1 **The genetic architecture underlying body-size traits plasticity over different**  
2 **temperatures and developmental stages in *Caenorhabditis elegans***

3 Muhammad I. Maulana<sup>1</sup>, Joost A.G. Riksen<sup>1</sup>, Basten L. Snoek<sup>1,2</sup>, Jan E. Kammenga<sup>1,3</sup>, Mark  
4 G. Sterken<sup>1,3</sup>

5

6 <sup>1</sup>Laboratory of Nematology, Wageningen University, Droevendaalsesteeg 1, 6708 PB

7 Wageningen, The Netherlands

8 <sup>2</sup>Theoretical Biology and Bioinformatics, Utrecht University, Padualaan 8, 3584 CH Utrecht,

9 The Netherlands

10 <sup>3</sup>Corresponding authors

11

12 **Keywords:** *Caenorhabditis elegans*, body-size traits, temperature, QTL, plasticity

13 **Abstract**

14 Most ectotherms obey the temperature-size rule, meaning they grow larger in a colder  
15 environment. This raises the question of how the interplay between genes and temperature  
16 affect the body size of ectotherms. Despite the growing body of literature on the physiological  
17 life-history and molecular genetic mechanism underlying the temperature-size rule, the  
18 overall genetic architecture orchestrating this complex phenotype is not yet fully understood.  
19 One approach to identify genetic regulators of complex phenotypes is Quantitative Trait  
20 Locus (QTL) mapping. Here, we explore the genetic architecture of body size phenotypes, in  
21 different temperatures using *Caenorhabditis elegans* as a model ectotherm. We used 40  
22 recombinant inbred lines (RILs) derived from N2 and CB4856, which were reared at four  
23 different temperatures (16°C, 20°C, 24°C, and 26°C) and measured at two developmental  
24 stages (L4 and adult). The animals were measured for body length, width at vulva, body  
25 volume, length/width ratio, and seven other body-size traits. The genetically diverse RILs  
26 varied in their body-size phenotypes with heritabilities ranging from 0.20 to 0.99. We  
27 detected 18 QTL underlying the body-size phenotypes across all treatment combinations, with  
28 the majority clustering on Chromosome X. We hypothesize that the Chromosome X QTL  
29 could result from a known pleiotropic regulator – *npr-1* – known to affect the body size of *C.*  
30 *elegans* through behavioral changes. In conclusion, our findings shed more light on multiple  
31 loci affecting body size plasticity and allow for a more refined analysis of the temperature-  
32 size rule.

### 33 **Introduction**

34           The body temperature of ectotherms such as invertebrates and fish are negatively  
35 correlated with their ambient temperature, where warmer environments result in smaller  
36 body-size. Besides body-size, the ectotherms' life-history traits are also strongly affected by  
37 temperatures. Phenotypic plasticity (the phenotypes that can be expressed by a single  
38 genotype at different environmental conditions) due to temperature changes has been studied  
39 widely for many different ectotherms, including evolutionary, ecological, physiological, and  
40 molecular investigations. In particular, body size plasticity has been studied well, aiming to  
41 understand why ectotherms grow larger at lower temperatures, a process called the  
42 temperature-size rule (Angilletta & Dunham, 2003; Atkinson 1994). Atkinson 1994 gathered  
43 results on the temperature-size rules phenotype in ectotherms from extensive number of  
44 studies and showed that 83% of the studies described that colder temperature resulted in  
45 significantly bigger body size. Although allelic variants and genes have been found that play  
46 an important role in body size plasticity, the genetic architecture underlying this phenomenon  
47 is not fully uncovered yet.

48           Nematodes are not exceptional to this phenomenon. For instance, the nematode  
49 *Caenorhabditis elegans*, showed a 33% larger body size when grown at 10°C compared to  
50 nematodes grown at 25°C (Van Voorhies, 1996) and other temperatures (i.e 24°C) (Gutteling  
51 et al., 2007; Kammenga et al., 2007). Part of this phenotypic variation in lower-temperature-  
52 dependent body size was caused by natural genetic variation in the calpain-like protease *tra-3*  
53 (Kammenga et al., 2007). Overall, *C. elegans* is an attractive organism for studying the  
54 genetics of plasticity to temperature. Its small genome, rapid life cycle (3.5 days at 20°C),  
55 genetic tractability, and a wealth of available experimental data have made this nematode a  
56 powerful platform to study the genetics underlying complex traits (Gaertner & Phillips, 2010;  
57 L. B. Snoek et al., 2020). Besides, *C. elegans* can be maintained completely homozygous,

58 produce many offspring (200-300 offspring per self-fertilizing hermaphrodite), and can be  
59 outcrossed with rarely occurring males (Petersen et al., 2015; Sterken et al., 2015; Gaertner &  
60 Phillips, 2010). Furthermore, there are many temperature-related trait differences between two  
61 widely used divergent strains: N2 and CB4856. More specifically, studies reported that  
62 CB4856 and N2 differed in their response to temperatures in several life-history traits such as  
63 time to maturity, fertility, egg size, body size, lifespan, and also in gene expression  
64 regulation (Gutteling et al., 2007; Gutteling et al., 2007; Jovic et al., 2017; Kammenga et al.,  
65 2007; Li et al., 2006; Rodriguez et al., 2012; Viñuela et al., 2011). Despite these findings, we  
66 still do not have a full overview of the loci that affect plasticity at a larger range of different  
67 temperatures.

68 To further elucidate the genetic architecture of temperature affected body size  
69 plasticity in *C. elegans*, we selected 40 RILs derived from N2 and CB4856 parents (Li et al.,  
70 2006) to study the plasticity and genetic regulation of body-size traits (body-size and some  
71 internal organs size) under four temperatures and two developmental stages. First, we sought  
72 to investigate the effect of temperature and developmental stages to the genetic parameters  
73 (heritability and transgressive segregation) and correlation of the body-size traits.  
74 Subsequently, we investigated the genomic regions underlying these body-size traits across  
75 temperature-developmental stage combinations. We found 18 QTL of body-size traits. Many  
76 of the QTL for different traits colocalized at the same position within temperatures suggesting  
77 a pleiotropic effect or close linkage. Moreover, we found colocalizing QTL across  
78 temperatures indicating a possible temperature sensitive regulatory mechanism.

79 **Materials and methods**

80

81 *Mapping population*

82 The mapping population used in this study consisted of 40 RILs from a 200 RIL population  
83 derived from crossing of N2 and CB4856. These RILs were generated by (Li et al., 2006) and  
84 most were genotyped by sequencing, with a genetic map consisting of 729 Single Nucleotide  
85 Polymorphism (SNP) markers (Thompson et al., 2015). The strain names and genotypes can  
86 be found in Figure S1.

87 We found that long-range linkage, between markers on different chromosomes, was not  
88 present in the population, by studying the pairwise correlation of the genetic markers in the  
89 used population (Figure S2).

90

91 *Cultivation and experimental procedures*

92 *C. elegans* nematodes were reared following standard culturing practices (Brenner, 1974).  
93 RILs were kept at 20°C before experiments and three days before starting an experiment a  
94 starved population was transferred to a fresh NGM plate. An experiment was started by  
95 bleaching the egg-laying population, following standard protocols (Brenner, 1974). From that  
96 point onward, RILs were grown at four different temperatures: 16°C, 20°C, 24°C, or 26°C. At  
97 two time-points of developmental stages (L4 and adult) per temperature, microscope pictures  
98 (Leica DM IRB, AxioVision) were taken of three nematodes per line per temperature that  
99 were mounted on agar pads. The timepoints were chosen such that L4 and young adult  
100 nematodes were photographed. The exact times are indicated in the sample data file (Table  
101 S1).

102

103 *Trait measurements and calculations*

104 The number of RILs subjected to treatments per developmental stage was 40, except for  
105 treatment of temperature 24°C at L4 stage, where 39 RILs were used. Per life-stage and  
106 temperature we took measurements of 3 replicate individuals per RIL, and 6 replicate  
107 individuals of the parental lines N2 and CB4856 (from two independent populations). This  
108 resulted in 1056 pictures.

109 To quantify traits, the pictures were loaded into ImageJ (version 1.51f) and traits were  
110 manually measured. In total, nine body-size traits were measured: (i) body length, (ii) width at  
111 vulva, (iii) length of the pharynx, (iv) width of the pharynx, (v) length of the isthmus, (vi)  
112 length of the buccal cavity, (vii) length of the procorpus, (viii) surface postbulb, and (ix)  
113 surface nematode. To convert the measurement data from pixels to millimeters (mm), a figure  
114 of scale (in mm) was loaded to imageJ. Subsequently, the resolution of *C. elegans* picture and  
115 the scale picture were equalized. Next, in ImageJ we determined how many pixels were  
116 represented by 0.1 mm. This step was repeated 10 times and the average value was taken as  
117 standard conversion scale from pixels to mm. We also calculated body volume (assuming the  
118 nematodes body resembles a tube) as

$$V_{body} = \pi * \left( \frac{L_{vulva}}{2} \right) * L_{body}$$

119 and the length/width ratio (L/W ratio) as the ratio of body length/width at vulva. For none of  
120 the traits we have a complete dataset due to difficulties in obtaining accurate measurements,  
121 the number of missing values for each trait are as follows: body length = 67; width at vulva =  
122 102; length pharynx = 76; length isthmus = 220; surface postbulb = 219; surface nematode =  
123 232; length buccal cavity = 193; length procorpus = 242; body volume = 135; width pharynx =  
124 65; length/width ratio = 135.

125 For QTL mapping purposes, we defined the phenotypic plasticity of all traits as ratio  
126 between the trait mean value at 16°C to 20°C, 20°C to 24°C, and 24°C to 26°C. All raw data  
127 can be found in Table S2.

128

### 129 *Analytical Software Used*

130 Phenotypic data was analyzed in “R” version 3.5.2x64 using custom written scripts (R core  
131 Team 2017). The script is accessible via Gitlab:  
132 [https://git.wur.nl/published\\_papers/maulana\\_2021\\_4temp](https://git.wur.nl/published_papers/maulana_2021_4temp). R package used for organizing data  
133 was the tidyverse (Wickham et al., 2019), while all plots were made using ggplot2 package  
134 (Wickham, 2011), except for heatmaps in Figure S3 which were made using the “heatmap ()”  
135 function provided in R. The data was deposited to WormQTL2 where it can be explored  
136 interactively ([www.bioinformatics.nl/WormQTL2](http://www.bioinformatics.nl/WormQTL2)) (Snoek et al., 2020).

137

### 138 *Genotype-environment interaction*

139 All phenotypic data were found to be normally distributed, allowing to perform parametric  
140 analysis on the data. To determine the effect of RIL lines, temperatures, and developmental  
141 stages on the phenotypic traits, full three-way ANOVA was performed, and when appropriate  
142 followed by Fisher’s LSD *posthoc* test. The traits were regarded as dependent variable with  
143 temperatures, developmental stages, and RILs as factors. Significant differences were  
144 determined using p-value < 0.05 threshold.

145

### 146 *Correlation analysis*

147 The correlation between the traits in all treatment combinations was determined by the  
148 Pearson correlation index and plotted in a correlation plot. To correct for the effect of outliers  
149 (effect of very high or low value of single observation), we normalized the data as follows:

$$X_{norm,i,j} = \log (x_{i,j} / \mu)$$

150 where  $x$  is individual observation of the traits in temperature  $i$  (16°C, 20°C, 24°C, 26°C) and  
151 developmental stage  $j$  (L4, adult) while  $\mu$  is the mean value of all traits.

152

153 *Transgressive segregation*

154 To determine transgressive segregation of the traits among RILs panel, we performed multiple  
155 t-tests comparing all RIL panel to both parents for all traits per temperature and  
156 developmental stages. Transgression was defined when the traits of individual RIL is  
157 significantly different than both parents (p.adjust with FDR < 0.05; equal variance not  
158 assumed).

159

160 *Heritability estimation*

161 Broad-sense and narrow-sense heritability of the phenotypic traits over RIL lines was  
162 calculated using Restricted Maximum Likelihood (REML) model to explain variation of the  
163 traits across the RIL lines (Kang et al., 2008; Rockman et al., 2010). The broad sense  
164 heritability was calculated according to the following equation:

165 
$$H^2 = (V_G / (V_G + V_E))$$

166 where  $H^2$  is the broad-sense heritability,  $V_G$  is the genotypic variation explained by the RILs,  
167 and  $V_e$  is residual variation. The  $V_G$  and  $V_E$  were estimated by the lme4 model  $x_{\text{norm}} \sim 1 +$   
168  $(1|\text{strain})$  (Bates et al., 2015).

169 Narrow-sense heritability is defined as the total variation in the population which is  
170 captured by additive effects. We calculated these using the heritability package in R, which  
171 estimates narrow-sense heritability based on an kinship matrix (Kruijer et al., 2014). The  
172 kinship matrix was calculated using the kinship function from the Emma package in R (Carta  
173 et al., 2011; Villanova et al., 2011).

174 The significances of broad and narrow-sense heritability were determined by  
175 permutation analysis where the traits values were randomly assigned to the RILs. Over these  
176 permuted values, the variation captured by genotype and residuals were then calculated.



177 This permutation was done 1,000 times for each trait. The result obtained were used as the by-  
178 chance-distribution and an FDR= 0.05 threshold was taken as the 50<sup>th</sup> highest value.

179

#### 180 *QTL mapping*

181 QTL mapping was performed using custom script in R using fitted single marker model as  
182 follows:

$$\mu_{i,j} = x_i + E_j$$

183 where  $\mu$  is the averaged of all strains replicates in terms of their body size-traits  $i$ , of RIL  $j$  ( $N$   
184 = 40) on marker location  $x$  ( $x= 1, 2, 3, \dots, 729$ ).

185 Detection of QTL was done by calculating a  $-\log_{10}(p)$  score for each marker and each  
186 trait. All the values were normalized as  $\mu_{norm_{i,j}} = \log(\mu_{i,j})$  where  $\mu$  is mean value of the  
187 traits in temperature  $i$  (16°C, 20°C, 24°C, 26°C) and developmental stage  $j$  (L4, adult). To  
188 estimate empirical significance of  $-\log_{10}(p)$ , the traits were randomly permuted value over  
189 the RILs 1,000 times. The permutation was done per environment (temperatures)  
190 independently, in a similar way as the QTL mapping. The calculation resulted in a  
191 significance threshold with false discovery rate (FDR) = 0.05 at a  $-\log_{10}(p)$  of 3.4 for QTL  
192 detection.

193 **Results**

194 ***C. elegans* body size traits vary across temperatures and developmental stages**

195 To investigate the impact of different genetic background, ambient temperature  
196 condition, and developmental stages on the body-size traits, we used a panel of 40 RILs  
197 derived from a cross between Bristol strain (N2) and Hawaiian strain (CB4856) (Li et al.,  
198 2006). Each individual RIL was grown under four different temperature regimes (16°C, 20°C,  
199 24°C, and 26°C). Once reaching the L4 and adult stage, we took pictures of each RIL with  
200 three individual replicates per strain and determined the body size parameters using ImageJ  
201 (Figure 1A; see materials and methods).

202 The eleven body-size traits showed a wide range of variation across RILs, sometimes  
203 exceeding their parental strains, suggesting transgressive segregation in the population (Figure  
204 1B; Figure S4). We found that body volume of adult worms in CB4856 did not differ between  
205 16°C and 24°C whereas Bristol N2 grew bigger at lower temperatures. This is in agreement  
206 with Kammenga et al., (2007) showing that CB4856 body size was less plastic than N2.

207 To get insight into the relations between the traits measured, we performed a  
208 correlation analysis for all pairs of traits at the two developmental stages. We found that the  
209 level of between trait-correlation differed between L4 and adult stage, where temperature  
210 seems to be the main driving factor (Figure S3). Both in L4 and adult stage, the body-size  
211 traits displayed a strong positive correlation within the same temperature, and strong negative  
212 correlation between different temperatures, suggesting that the variation in the body-size traits  
213 were temperature specific. Interestingly, both in L4 and adult stage, the body-size traits of  
214 worm grown in 16°C and 26°C were separated into several small clusters, while the traits  
215 from 20°C and 24°C treatments formed a single positively correlated cluster. These results  
216 indicated that there were more similar patterns of variation over RILs in temperature 20°C and  
217 24°C. Strongly correlated body-size traits imply that the same quantitative trait loci could be

218 detected for these traits due to similar patterns of variation in the RILs, temperatures, and  
219 developmental stages. To explore the source of variation of the body-size traits in the RILs  
220 population, we used principal component analysis (PCA) (Figure S5). The PCAs describes the  
221 variation of the traits based on temperatures and genetic background per developmental stage.  
222 At the L4 stage, the first principal component captured 45.5% of the variation that mostly due  
223 to 16°C temperature, while the second principal component captured 24% of the variation  
224 which derived from 24°C and 26°C temperatures. We found that at L4 stage, the RILs were  
225 more similar in lower temperature (16°C) while in 20°C, they were distributed across the PC  
226 plot. Subsequently, the value of body-size traits of the nematodes at 24°C were similar to the  
227 values at 26°C, but divided into two cluster (Figure S5). On the other hand, the individual  
228 RILs did not show any clear clusters at adult stage, indicating there was high variation  
229 between the RILs as a result of interaction between environment and genetic background of  
230 the RILs. This result combined with the correlation analysis show that there was a substantial  
231 variation in the RILs, suggesting that it was possible to detect QTL controlling the traits.

232

### 233 **Transgressive segregation and heritability indicate a complex genetic architecture** 234 **underlying body-size traits**

235 Upon inspecting the distribution of trait variation in the RILs compared to N2 and  
236 CB4856, we observed high levels of variation exceeding those of the parental strains (Figure  
237 1B; Figure S4). This suggests transgressive segregation within the RIL population. Hence, we  
238 tested the trait values of each RIL versus the parents. We found transgression for almost all  
239 traits per temperature-developmental stage combinations (t-test, p.adjust FDR < 0.05) (Table  
240 S3). Our findings show that the number of two-sided transgressive RILs depended on the  
241 combination of temperature and developmental stage (Figure 2A Figure 2B; Table S3).  
242 Whereas in the L4 stage the number of transgressive RILs was constant under 16°C, and

243 20°C, slightly dropped under 24°C – and then increased at 26°C. Conversely, in the adult  
244 stage, the number of transgressive strains decreased as the temperature increased. Moreover, it  
245 shows that the parental lines have both positive and negative alleles that interact with the  
246 environment leading to a more robust/stable phenotype over a broader temperature range.  
247 Using ANOVA, we found that developmental stage was indeed the factor driving  
248 transgression ( $p = 0.0275$ ; Table 1) whereas temperature alone showed no relation to the  
249 transgression ( $p = 0.786$ ). These findings indicate environment and age-specific effects on  
250 the regulation of body-size traits.

**Table 1** Results of ANOVA for the number of transgressive lines over temperatures and developmental stages.

| Source                          | Df | Sum Sq | Mean Sq | F value | Pr(>F) |
|---------------------------------|----|--------|---------|---------|--------|
| Temperature                     | 3  | 7.7    | 2.55    | 0.35    | 0.787  |
| Developmental Stage             | 1  | 37.0   | 37.01   | 5.13    | 0.028  |
| Temperature*Developmental Stage | 3  | 52.3   | 17.43   | 2.41    | 0.076  |
| Residuals                       | 56 | 404.4  | 7.22    |         |        |

*ANOVA: Analysis of variance; Df: degree of freedom*

251

252 Next, to determine the proportion of variance in body-size traits that were caused by  
253 genetic factors, we calculated the broad sense-heritability ( $H^2$ ) of each trait. We found  
254 significant heritability (REML, FDR = 0.05) for 81 out of 88 traits in developmental stage-  
255 temperature combinations. The significant heritabilities ranged from 0.20 (width Pharynx at  
256 20°C in L4) to 0.99 (width at 16°C in L4) (Figure 2C; Table S4). Hence, for a large fraction of  
257 traits we could detect a high contribution of genetic factors. In addition to broad-sense  
258 heritability, we calculated the narrow-sense heritability ( $h^2$ ) to identify how much of the  
259 variation could be explained by additive allelic effects. This analysis suggested that there  
260 were 11 traits with significant additive effect (REML, FDR < 0.05; Table S4). For nearly all  
261 body-size traits we detected broad-sense heritabilities well beyond narrow-sense heritabilities,  
262 indicating a role for epistasis in the genetic architecture of the traits.

263

**Table 2** Results of ANOVA for  $H^2$  of all traits over temperatures and developmental stages

| Source                           | Df | Sum Sq | Mean Sq | F value | Pr(>F) |
|----------------------------------|----|--------|---------|---------|--------|
| Temperatures                     | 3  | 0.292  | 0.097   | 2.35    | 0.078  |
| Developmental Stages             | 1  | 0.019  | 0.019   | 0.472   | 0.494  |
| Temperatures*Developmental Stage | 3  | 0.308  | 0.103   | 2.487   | 0.066  |
| Residuals                        | 80 | 3.308  | 0.041   |         |        |

*ANOVA: Analysis of variance; Df: degree of freedom*

264 To understand the contribution of temperature and developmental stage on heritability  
265 of all traits measured, we conducted an ANOVA (Table 2). The results suggested a trend that  
266 the main factor driving heritability was temperature ( $p = 0.078$ ) and its combination with  
267 developmental stage ( $p = 0.066$ ). On the other hand, developmental stage showed little  
268 relation to the variation of heritability ( $p = 0.493$ ). In the adult stage, we observed there were  
269 four traits (width at vulva, body length, body volume, and surface area of nematodes) which  
270 are relatively robust across all temperatures while in L4 they were found to be more variable  
271 across temperature. These four traits ,were affecting each other and observed to be positively  
272 correlated (Figure S3). Taken together, overall body-size traits show significant broad-sense  
273 heritabilities, indicating a substantial effect of the genetic background on the variation in these  
274 traits in this population. Moreover, the correlation between some traits indicate a shared  
275 genetic architecture between the traits. These results indicate a higher chance of detecting  
276 QTL on the traits measured.

277

278 **QTL underlying body-size traits in *C. elegans* are influenced by temperature and**  
279 **developmental stages**

280 To identify underlying loci controlling the variation of body-size traits, we performed  
281 QTL mapping for all the body-size traits measured in the 40 RILs. Using log-normalized

282 mean values per RIL as input, we found 18 significant QTL ( $-\log_{10}(p) = 3.4$ , FDR = 0.05)  
283 with  $-\log_{10}(p)$  scores ranging up to 6.5 in each temperature and developmental stages (Figure  
284 3, Table S5). We found QTL explaining 28-53% of variance among the RILs (Table S5). We  
285 found 7 QTL in the L4 stage namely surface area, length pharynx, body length, length  
286 procorpus (detected at 20°C), length/width ratio (detected at 20°C and 24 °C), and surface  
287 postbulb (detected at 16 °C) . For the adult stage, 11 QTL were detected for the body-size  
288 traits. Here, we found QTL evenly distributed over the temperatures: two at 16°C, two at  
289 20°C, three at 24°C, and four at 26°C (Figure 3A). Of the 18 significant QTL, eight were  
290 located on chromosome X, five QTL on chromosome V, three on chromosome I and two on  
291 chromosome IV.

292 We observed QTL-hotspots for various traits. For example, the chromosome I QTL  
293 (surface area, body volume, and body length) were positively correlated traits, mapped in the  
294 same developmental stage and temperature combination. Hence, this could point to a body-  
295 size QTL, where the N2 genotype was associated with larger body size compared to the  
296 CB4856 genotype (Figure 3B). Interestingly, all QTL on chromosome V were associated with  
297 the size of the feeding-apparatus, were found over various temperatures, and were all  
298 associated with an increased size in CB4856 (Figure 3A; Figure S6). In contrast, traits related  
299 to the overall body size (e.g. volume) were almost exclusively associated with an increased  
300 size due to the N2 allele (Figure 3B).

301 In line with the indications of the correlation- and heritability analyses, we found  
302 evidence for environment (temperatures), age (developmental stage) and genotype  
303 interactions. For example, for length/width ratio (Figure. 3C) in the adult stage, significant  
304 QTL in chromosome X were detected for the worms grown at 16°C and 24°C, one QTL on  
305 chromosome IV for worms grown at 20°C, and no significant QTL detected at 26°C. When  
306 we mapped the trait in adult worms grown at 16°C, we found a significant QTL on

307 chromosome X which we did not find in the L4 stage at 16°C. The same result was found for  
308 QTL at temperature 20°C at adult stage on chromosome IV which was not present in L4 stage.  
309 Similar patterns of (dis-) appearance were observed for many traits (Figure S7). Hence, traits  
310 may be regulated by different set of genes (loci) dependent on temperature-environment and  
311 developmental stage. This indicates that there is a considerable effect of genotype-  
312 environment interactions.

313

### 314 **The RIL population revealed plasticity QTL for several body-size traits**

315 The previous results suggested that QTL affecting body-size traits can be located on  
316 different chromosomes when measured in different environment, indicating an environment-  
317 QTL interaction. To further understand the mechanism of trait plasticity, we determined trait  
318 plasticity using the ratio value of the traits between environments. For QTL mapping, we  
319 mapped the plasticity by taking the ratio of measured traits from: 16°C to 20°C, 20°C to 24°C,  
320 and 24°C to 26°C as the input data. For all three conditions, we found four significant  
321 plasticity QTL. Two plasticity QTL were found in the temperature range from 16°C to 20°C,  
322 while one plasticity QTL was found in both temperature range of 20°C to 24°C, and 24°C to  
323 26°C. The two plasticity QTL in in the range between 16°C to 20°C harbouring a locus  
324 associated to width pharynx at adult stage, and length of the procorpus at adult stage. Two  
325 QTLs were detected for plasticity in isthmus length (20 °C - 24 °C, adult; 24 °C - 26 °C, L4)  
326 (Figure 4A, 4B, 4C; Table S6). Plasticity QTL in the temperature range of 16°C to 20°C  
327 related to length procorpus at adult stage has a positive effect of N2 genotype at the peak  
328 marker location, whereas the width pharynx plasticity QTL at the same temperature range  
329 associated to CB4856 genotype. In temperature range 20°C to 24°C, the plasticity QTL related  
330 to length isthmus of the nematodes at adult stage was associated to N2 genotype. In contrast,  
331 length isthmus of the nematodes at L4 stage in temperature range of 24°C to 26°C was

332 associated to CB4856 genotype. This indicates that temperature-related phenotypic plasticity  
333 of most body-size traits was not governed by alleles with large changes in effect-sizes over  
334 the temperature gradient. Rather, it indicates that in general, temperature-related plasticity is  
335 due to small increases in loci effects over the course of the gradient.



## 336 **Discussion**

### 337 **Correlation between body-size traits in *C. elegans* are temperature-specific**

338 In most ectotherms, temperature is an important factor driving body size and is related  
339 to life history traits (Angilletta & Dunham, 2003; Ellers & Driessen, 2011). This was also  
340 found for *C. elegans* (Gutteling et al., 2007a,b; Kammenga et al., 2007). In this study, we  
341 used a *C. elegans* RIL population to study the underlying genetic regions that regulate the  
342 body-size traits, both main body traits (i.e length, width at vulva, volume, length/width ratio,  
343 and surface area) as well as internal organs and feeding apparatus (i.e length isthmus, length  
344 procorpus, length pharynx, width pharynx, and surface postbulb) in different temperatures at  
345 two developmental stages. We found that positive correlation between traits was present only  
346 within certain temperatures, not between-temperatures. This result suggests a temperature-  
347 and developmental stage specific effect on the correlation among traits which can translate  
348 into a shared genetic architecture. A similar phenomenon was reported for body mass and egg  
349 size in *C. elegans* which correlated positively at 24°C, yet no correlation detected for these  
350 traits was reported at 12°C (Gutteling et al., 2007b). Furthermore, these authors also found a  
351 negative correlation between egg size and egg number at 12°C but not at 24°C. This is not  
352 surprising since developmental stages (age) and temperature are also known to affect the gene  
353 expression level in *C. elegans* that translate into a variation in expression-QTL (eQTL) (Li et  
354 al., 2006; Snoek et al., 2017; Viñuela et al., 2010).

355 Previous studies have reported the effect of temperatures on genetic correlation of  
356 several life history traits in different species. Norry & Loeschcke (2002) conducted a selection  
357 experiment and found a positive correlation effect of lifespan with temperature and sex in *D.*  
358 *melanogaster* at 25°C where the male flies lived longer. However, this effect was reversed at  
359 14°C in which the male flies were shorter lived. In *C. elegans*, an 18% of increase lifespan  
360 due to heat-shock was reported for CB4856 but not for N2, whereas the RILs showed a wide

361 range of lifespan variation due to heat-shock (Rodriguez et al., 2012). Our results are in  
362 agreement of other previous studies (reviewed in Sgro & Hoffmann, 2004) that different  
363 environmental conditions result in a different correlation power, suggesting that evolutionary  
364 trajectories on trade-offs between traits, especially the traits that are controlled by specific  
365 loci, depend strongly on the environmental condition.

366

### 367 **Genetic parameters indicate a complex genetic regulation of body-size traits**

368 In a population derived from two diverse parents, it is common to detect extreme  
369 phenotypes exceeding way beyond the parents (transgression) (Rieseberg et al., 1999).  
370 Transgression can represent genetic complexity of a trait, for example due to genetic  
371 interaction (epistasis) or it could mean that the trait is controlled by multiple loci with  
372 opposite effect combinations in the parental strains resulting in a similar phenotype. For  
373 example, transgression has been reported for *C. elegans* life-history traits such as egg size,  
374 number of eggs, body length (Andersen et al., 2015; Gutteling et al., 2007b; Kammenga et al.,  
375 2007), lifespan (Rodriguez et al., 2012), as well as metabolite levels (Gao et al., 2018), and  
376 gene expression (Li et al., 2006). We found transgressive segregation for almost all traits in  
377 temperature and developmental stage combinations, indicating a complementary actions of  
378 multiple loci underlying these traits.

379 We then calculated the broad-sense heritability ( $H^2$ ) to investigate the proportion of  
380 variance explained by genetic factors in our RIL population. 81 out of 88 body-size traits in  
381 temperature-developmental stage combinations were significantly heritable. We found that  
382 the heritability of traits was dynamic across different temperatures and developmental stages.  
383 Our estimation of broad-sense heritability for adult body length at 20°C (0.51) was similar to  
384 an estimation using another N2 x CB4856 RIL panel, reporting 0.57 (Andersen et al., 2014).  
385 In addition, the broad-sense heritability of body volume (0.71) and width at vulva (0.76) in

386 this study are also similar to (B. L. Snoek et al., 2019), which were 0.77 and 0.75,  
387 respectively. Heritability is a population trait characteristic and highly depends on the type of  
388 population used and environment. Therefore, the fact that we found similar heritability with  
389 previous works indicate that the variation of these traits is quite stable between different  
390 mapping population. This could also mean that the relative effect of the micro-environment as  
391 well as the stochasticity is small. Furthermore, similar patterns of heritability that changed  
392 over temperatures (12°C and 24°C) were reported for body mass (volume), growth rate (body  
393 length), age at maturity, egg size, and egg numbers (Gutteling et al., 2007a; Gutteling et al.,  
394 2007b). The heritability found in our study for body volume and body size were higher, but  
395 with the same pattern, where colder temperature resulted in a higher heritability, meaning that  
396 the effect of microenvironment or stochasticity is less compared to warmer temperature.

397 We found heritability was less variable in the adult stage compared to L4. This may be  
398 because the worm at L4 grow relatively faster which causing more variation between  
399 individuals. Yet, analysis of variance on the heritability showed that temperature was the most  
400 influential driver of heritability. At L4 stage, temperature 16°C and 26°C seemed to lead to a  
401 higher heritability value, whereas this pattern was not observed at adult stage. Despite the  
402 dynamics of heritability across temperature, we found some traits with robust heritability  
403 across temperature in adult stage namely width at vulva, body volume, body length, and  
404 surface area of the nematode. These traits were also strongly positively correlated in all  
405 temperatures. This means, the genetic loci underlying these traits might not be greatly affected  
406 by temperature changes which based on the QTL profile in Figure S7 is the case.

407

#### 408 **QTL mapping revealed genetic-environment interaction underlying body-size traits**

409 By QTL mapping, we found 18 significant QTL for 88 temperature and developmental  
410 stage combinations regulating body-size traits. Here, we showed QTL of some the traits were

411 colocalized in the same location in chromosome. For example, body length and surface area  
412 of the nematode in L4 stage at 20°C shared the same genomic region on the left arm of  
413 chromosome X. Similarly, the QTL for volume, body length and width at vulva in adult stage  
414 at 26°C shared the same location at chromosome I. This is expected since these traits have  
415 strong positive correlation. All the colocalized traits showed the same QTL effect where N2-  
416 derived loci were associated with an increase in size. It is possible that such co-localized QTL  
417 were the result of a single pleiotropic modifier affecting various aspects of the *C. elegans*  
418 physiology. On the other hand, this might be the result of unresolved separate QTL (Dupuis &  
419 Siegmund, 1999; Gutteling et al., 2007b; Sterken et al., 2020).

420         Some of our QTL matched previous work. As body length at 20°C has been  
421 investigated across multiple studies, we used it to cross-reference our mapping. The same  
422 location (chromosome X: 4.9 Mb) was mapped in two other studies (Andersen et al., 2014;  
423 Andersen et al., 2015). Furthermore, many QTL located in left arm of chromosome X were  
424 associated with body length, indicating the alleles controlling these traits might the same or  
425 linked with alleles of body length. In other study, using a multi-parent RIL, it was found that  
426 loci located in the same position (chromosome X around 4.5 to 5Mb) was associated with  
427 length/width ratio which is also related to body length (Snoek et al., 2019). For the same trait,  
428 (Snoek et al., 2014) found the QTL in different chromosome (i.e chr IV), meaning that our  
429 study has the power to reveal previous undetected QTL.

430         These QTL in chromosome X overlapped with the location of the Neuropeptide  
431 receptor 1 (*npr-1*) allele, which encodes the mammalian neuropeptide Y receptor homolog.  
432 This allele is a known pleiotropic regulator affecting traits such as lifetime fecundity, body  
433 size, and resistance to pathogens mediated by altered exposure to bacterial food (Andersen et  
434 al., 2014; Nakad et al., 2016; Reddy et al., 2009; Sterken et al., 2015). The *npr-1* allele affect  
435 body-size traits by changing feeding behaviour pattern of the worm due to oxygen

436 concentration that resulted in different food uptake. CB4856 genotype with the ancestral *npr-*  
437 *I* gene aggregated in low oxygen condition (10%) at the edge of bacterial lawn, that made  
438 them underfed and starved. In contrast, the N2 genotype with *npr-1* mutation spread out  
439 across bacterial lawn with oxygen concentration 21%, thus has more food compared to  
440 CB4856 worms (Andersen et al., 2014; Reddy et al., 2009). Moreover, 7 out of 8 QTL that  
441 colocalized in chromosome X has an increase size that are associated with N2 genotype,  
442 which support our hypothesis that those seven trait are *npr-1* regulated.

443 Although not significant, we found potential QTL of body volume and width at vulva  
444 of adult nematode at 20°C and 24°C on the left arm of chromosome IV (Figure S7) which  
445 overlapped with QTL identified previously for body volume by (Gutteling et al., 2007b;  
446 Kammenga et al., 2007) at 24°C using a larger population of RILs, also in chromosome X at  
447 20°C using multi-parental RIL (Snoek et al., 2019). These results indicate that these QTL  
448 represent robust and predictable genetic associations with temperature and size.

449 From 18 significant QTL, 9/18 (50%) were transgressive and six of the transgressive  
450 traits were found in L4 stage. In addition, 15/18 (83%) of the QTL had moderate to high  
451 heritability (> 0.3). These findings indicate a highly complex genetic regulation of many  
452 body-size traits that could involve multiple interaction of different genetic variants. This was  
453 supported by the higher value of broad-sense heritability compared to narrow-sense  
454 heritability which suggests that the driving factors of most heritable traits were additive loci  
455 of opposing effects or genetic interactions.

456

#### 457 **Mapping of plasticity increments indicates small effect-size changes result in shifting loci**

458 By mapping phenotypic plasticity over adjacent temperatures, we only found four  
459 plasticity QTL. We found two QTL over 16°C to 20°C that were related to width pharynx and  
460 length procorpus, both in adult stage. On the other hand, we detected one QTL over 20°C to

461 24°C that was related to length isthmus in adult stage and one QTL over 24°C to 26°C  
462 associated to length isthmus at L4 stage. These result suggests that the QTL associated  
463 plasticity was environment specific, meaning that the candidate genes in the QTL region are  
464 differentially expressed depending on environmental conditions (Gutteling et al., 2007b). We  
465 found plasticity QTL of width pharynx at adult stage (Figure 4A) and length isthmus at L4  
466 stage (Figure 4C) that were not detected before in the normal QTL mapping using single  
467 temperature regime which might indicate a locus regulating the trait's expression over  
468 different environmental condition.

469 Interestingly, plasticity QTL of length isthmus at L4 stage (Figure 4C) from gradient  
470 changes of 24°C to 26°C with higher size was associated to CB4856 genotype colocalized  
471 with length/width ratio QTL at adult stage under 24°C where higher size was associated to N2  
472 genotype. Furthermore, we also found plasticity QTL of length isthmus at adult stage (Figure  
473 4B) from gradient changes of 20°C to 24°C colocalized with length pharynx QTL at adult  
474 stage under 16°C with opposite genotype effect. These findings may indicate an allelic  
475 sensitivity model underlying plasticity mechanism where loci displaying environmentally  
476 based allelic sensitivity (Scheiner, 1993). The fact that these plasticity QTL were colocalized  
477 with normal QTL may suggest that the QTL contains loci/allele that is activated when the  
478 population in a different environment or in an unusual condition (Paaby & Rockman, 2014).

479 Here, we reported the use of 40 RILs derived from divergent strains N2 and CB4856  
480 in identifying the genetic parameters of body-size traits. We showed that in different  
481 temperatures regimes, heritability of certain traits could change as a result of environmental  
482 pressure. We also showed colocalized QTL of different traits in one region in chromosome X,  
483 I, V, and IV that indicates a pleiotropic effect or closely linked loci. Furthermore, we found  
484 temperature-specific QTL and plasticity QTL which differentially expressed depending on  
485 environmental conditions. Follow up study employing the use of near isogenic line or RIAIL

486 with selection on *npr-1* gene need to be performed to confirm the effect of detected QTL on  
487 the body-size traits. Together, our result showed the effect of different temperature and  
488 developmental stages to the complexity of body-size traits in *C. elegans*.

489

#### 490 **Acknowledgements**

491 The authors thank Simone Ariens for measurements on the microscopy images and Miriam  
492 Rodriguez for technical assistance. We thank Anne Morbach (Schlaugemacht.net) for making  
493 Figure 1A. We thank Harm Nijveen for assistance with WormQTL2. We thank Lisa van  
494 Sluijs for the critical review of the draft manuscript. We thank Fred van Eeuwijk for helpful  
495 discussions.

496

#### 497 **Funding**

498 M.G.S. was supported by NWO domain Applied and Engineering Sciences VENI grant  
499 (17282)

500

#### 501 **Availability of data and materials**

502 The strains used in this study can be requested from the authors. The underlying data is  
503 included in the paper and interactively accessible via WormQTL2.

504

#### 505 **Author contributions**

506 MGS, LBS and JEK conceived and designed the experiments. MGS and JAGR conducted the  
507 experiments. MIM analyzed the data with input from MGS. MIM and MGS wrote the  
508 manuscript, with input from JEK and LBS. All authors commented on the manuscript.

509 **Reference**

- 510 Andersen, E. C., Bloom, J. S., Gerke, J. P., & Kruglyak, L. (2014). A Variant in the  
511 Neuropeptide Receptor npr-1 is a Major Determinant of *Caenorhabditis elegans* Growth  
512 and Physiology. *PLoS Genetics*, *10*(2). <https://doi.org/10.1371/journal.pgen.1004156>
- 513 Andersen, E. C., Shimko, T. C., Crissman, J. R., Ghosh, R., Bloom, J. S., Seidel, H. S., ...  
514 Kruglyak, L. (2015). A Powerful New Quantitative Genetics Platform, Combining  
515 *Caenorhabditis elegans* High-Throughput Fitness Assays with a Large Collection of  
516 Recombinant Strains. *G3*, *5*(5), 911–920. <https://doi.org/10.1534/g3.115.017178>
- 517 Angilletta, M. J., & Dunham, A. E. (2003). The Temperature-Size Rule in Ectotherms:  $\square$ :  
518 Simple Evolutionary Explanations May Not Be General. *The American Naturalist*,  
519 *162*(3).
- 520 Atkinson, D. (1994). Temperature and organism size: a biological law for  
521 ectotherms?. *Advances in ecological research*, *25*, 1-58
- 522 Bates, D., Mächler, M., Bolker, B. M., & Walker, S. C. (2015). Fitting linear mixed-effects  
523 models using lme4. *Journal of Statistical Software*, *67*(1).  
524 <https://doi.org/10.18637/jss.v067.i01>
- 525 Brenner, S. (1974). Genetics of the *Caenorhabditis elegans*. *ChemBioChem*, *4*(8), 683–687.  
526 <https://doi.org/10.1002/cbic.200300625>
- 527 Carta, D., Villanova, L., Costacurta, S., Patelli, A., Poli, I., Vezzù, S., ... Falcaro, P. (2011).  
528 Method for optimizing coating properties based on an evolutionary algorithm approach.  
529 *Analytical Chemistry*, *83*(16), 6373–6380. <https://doi.org/10.1021/ac201337e>
- 530 Dupuis, J., & Siegmund, D. (1999). Statistical methods for mapping quantitative trait loci  
531 from a dense set of markers. *Genetics*, *151*(1), 373–386.
- 532 Ellers, J., & Driessen, G. (2011). Genetic correlation between temperature-induced plasticity  
533 of life-history traits in a soil arthropod. *Evolutionary Ecology*, *25*, 473–484.  
534 <https://doi.org/10.1007/s10682-010-9414-1>
- 535 Gaertner, B. E., & Phillips, P. C. (2010). *Caenorhabditis elegans* as a platform for molecular  
536 quantitative genetics and the systems biology of natural variation. *Genetics Research*,  
537 *92*(5–6), 331–348. <https://doi.org/10.1017/S0016672310000601>
- 538 Gao, A. W., Sterken, M. G., de Bos, J. uit, van Creij, J., Kamble, R., Snoek, B. L., ...  
539 Houtkooper, R. H. (2018). Natural genetic variation in *C. Elegans* identified genomic  
540 loci controlling metabolite levels. *Genome Research*, *28*(9), 1296–1308.  
541 <https://doi.org/10.1101/gr.232322.117>
- 542 Gutteling, E. W., Doroszuk, A., Riksen, J. A. G., Prokop, Z., Reszka, J., & Kammenga, J. E.  
543 (2007). Environmental influence on the genetic correlations between life-history traits in  
544 *Caenorhabditis elegans*. *Heredity*, *98*, 206–213. <https://doi.org/10.1038/sj.hdy.6800929>
- 545 Gutteling, E. W., Riksen, J. A. G., Bakker, J., & Kammenga, J. E. (2007). Mapping  
546 phenotypic plasticity and genotype – environment interactions affecting life-history traits  
547 in *Caenorhabditis elegans*. *Heredity*, *98*, 28–37. <https://doi.org/10.1038/sj.hdy.6800894>
- 548 Jovic, K., Sterken, M. G., Grilli, J., Bevers, R. P. J., Rodriguez, M., Riksen, J. A. G., ...  
549 Snoek, L. B. (2017). Temporal dynamics of gene expression in heat-stressed  
550 *Caenorhabditis elegans*. *PLoS ONE*, 1–16.
- 551 Kammenga, J. E., Doroszuk, A., Riksen, J. A. G., Hazendonk, E., Spiridon, L., Petrescu, A.  
552 J., ... Bakker, J. (2007). A *Caenorhabditis elegans* wild type defies the temperature-size  
553 rule owing to a single nucleotide polymorphism in tra-3. *PLoS Genetics*, *3*(3), 0358–  
554 0366. <https://doi.org/10.1371/journal.pgen.0030034>
- 555 Kang, M. H., Zaitlen, N. A., Wade, C. M., Kirby, A., Heckerman, D., Daly, M. J., & Eskin, E.  
556 (2008). Efficient control of population structure in model organism association mapping.  
557 *Genetics*, *178*(3), 1709–1723. <https://doi.org/10.1534/genetics.107.080101>
- 558 Kruijer, W., Boer, M. P., Malosetti, M., Flood, P. J., Engel, B., Kooke, R., ... Van Eeuwijk,



- 559 F. A. (2014). Marker-based estimation of heritability in immortal populations. *Genetics*,  
560 *199*(2), 379–398. <https://doi.org/10.1534/genetics.114.167916>
- 561 Li, Y., Álvarez, O. A., Gutteling, E. W., Tijsterman, M., Fu, J., Riksen, J. A. G., ...  
562 Kammenga, J. E. (2006). Mapping determinants of gene expression plasticity by  
563 genetical genomics in *C. elegans*. *PLoS Genetics*, *2*(12), 2155–2161.  
564 <https://doi.org/10.1371/journal.pgen.0020222>
- 565 Nakad, R., Snoek, L. B., Yang, W., Ellendt, S., Schneider, F., Mohr, T. G., ... Schulenburg,  
566 H. (2016). Contrasting invertebrate immune defense behaviors caused by a single gene,  
567 the *Caenorhabditis elegans* neuropeptide receptor gene *npr-1*. *BMC Genomics*, *17*(1), 1–  
568 20. <https://doi.org/10.1186/s12864-016-2603-8>
- 569 Norry, F. M., & Loeschcke, V. R. (2002). Longevity and resistance to cold stress in cold-  
570 stress selected lines and their controls in *Drosophila melanogaster*. *Journal of*  
571 *Evolutionary Biology*, *15*, 775–783.
- 572 Paaby, A. B., & Rockman, M. V. (2014). Cryptic genetic variation: evolution's hidden  
573 substrate. *Nature Reviews Genetics*, *15*(4), 247–258. <https://doi.org/10.1038/nrg3688>
- 574 Petersen, C., Dirksen, P., & Schulenburg, H. (2015). Why we need more ecology for genetic  
575 models such as *C. elegans*. *Trends in Genetics*, *31*(3), 120–127.  
576 <https://doi.org/10.1016/j.tig.2014.12.001>
- 577 Reddy, K. C., Andersen, E. C., Kruglyak, L., & Kim, D. H. (2009). A polymorphism in *npr-1*  
578 is a behavioral determinant of pathogen susceptibility in *C. elegans*. *Science*, *323*(5912),  
579 382–384. <https://doi.org/10.1126/science.1166527>
- 580 Rieseberg, L. H., Archer, M. A., & Wayne, R. K. (1999). Transgressive segregation,  
581 adaptation and speciation. *Heredity*, *83*(June).
- 582 Rockman, M. V., Skrovanek, S. M., & Kruglyak, L. (2010). Selection at Linked Sites Shapes.  
583 *Science*, (October), 372–376. <https://doi.org/10.1126/science.1194208>
- 584 Rodriguez, M., Snoek, L. B., Riksen, J. A. G., Bevers, R. P., & Kammenga, J. E. (2012).  
585 Genetic variation for stress-response hormesis in *C. elegans* lifespan. *Experimental*  
586 *Gerontology*, *47*(8), 581–587. <https://doi.org/10.1016/j.exger.2012.05.005>
- 587 Scheiner, S. (1993). Plasticity as a Selectable Trait: Reply to Via. *American Society of*  
588 *Naturalist*, *142*(2), 371–373.
- 589 Sgro, C., & Hoffmann, A. (2004). Genetic correlations, tradeoffs and environmental  
590 variation. *Heredity*, 241–248. <https://doi.org/10.1038/sj.hdy.6800532>
- 591 Snoek, B. L., Sterken, M. G., Bevers, R. P. J., Volkers, R. J. M., van't Hof, A., Brenchley, R.,  
592 ... Kammenga, J. E. (2017). Contribution of trans regulatory eQTL to cryptic genetic  
593 variation in *C. elegans*. *BMC Genomics*, *18*(1). [https://doi.org/10.1186/s12864-017-](https://doi.org/10.1186/s12864-017-3899-8)  
594 3899-8
- 595 Snoek, B. L., Volkers, R. J. M., Nijveen, H., Petersen, C., Dirksen, P., Sterken, M. G., ...  
596 Kammenga, J. E. (2019). A multi-parent recombinant inbred line population of *C.*  
597 *elegans* allows identification of novel QTLs for complex life history traits. *BMC Biology*,  
598 1–17.
- 599 Snoek, L. B., Orbidans, H. E., Stastna, J. J., Aartse, A., Rodriguez, M., Riksen, J. A. G., ...  
600 Harvey, S. C. (2014). Widespread genomic incompatibilities in *Caenorhabditis elegans*.  
601 *G3: Genes, Genomes, Genetics*, *4*(10), 1813–1823.  
602 <https://doi.org/10.1534/g3.114.013151>
- 603 Snoek, L. B., Sterken, M. G., Hartanto, M., van Zuilichem, A. J., Kammenga, J. E., de Ridder,  
604 D., & Nijveen, H. (2020). WormQTL2: an interactive platform for systems genetics in  
605 *Caenorhabditis elegans*. *Database: The Journal of Biological Databases and Curation*,  
606 *2020*, 1–17. <https://doi.org/10.1093/database/baz149>
- 607 Sterken, M. G., Bevers, R. P. J., Volkers, R. J. M., Riksen, J. A. G., Kammenga, J. E., &  
608 Snoek, B. L. (2020). Dissecting the eQTL Micro-Architecture in *Caenorhabditis elegans*.

- 609 *Frontiers in Genetics*, 11(November), 1–15. <https://doi.org/10.3389/fgene.2020.501376>
- 610 Sterken, M. G., Snoek, L. B., Kammenga, J. E., & Andersen, E. C. (2015). The laboratory  
611 domestication of *Caenorhabditis elegans*. *Trends in Genetics*, 31(5), 224–231.  
612 <https://doi.org/10.1016/j.tig.2015.02.009>
- 613 Team, R. C. (2017). R: A language and environment for statistical computing
- 614 Thompson, O. A., Snoek, L. B., Nijveen, H., Sterken, M. G., Volkers, R. J. M., Brenchley, R.,  
615 ... Waterston, R. H. (2015). Remarkably divergent regions punctuate the genome  
616 assembly of the *Caenorhabditis elegans* hawaiian strain CB4856. *Genetics*, 200(3), 975–  
617 989. <https://doi.org/10.1534/genetics.115.175950>
- 618 Van Voorhies, W. A. (1996). Bergmann size clines: A simple explanation for their occurrence  
619 in ectotherms. *Evolution*, 50(3), 1259–1264. <https://doi.org/10.1111/j.1558-5646.1996.tb02366.x>
- 620
- 621 Viñuela, A., Snoek, L. B., Riksen, J. A. G., & Kammenga, J. E. (2010). Genome-wide gene  
622 expression regulation as a function of genotype and age in *C. elegans*. *Genome Research*,  
623 20(7), 929–937. <https://doi.org/10.1101/gr.102160.109>
- 624 Viñuela, A., Snoek, L. B., Riksen, J. A. G., & Kammenga, J. E. (2011). Gene Expression  
625 Modifications by Temperature- Toxicants Interactions in *Caenorhabditis elegans*. *PLoS*  
626 *ONE*, 6(9). <https://doi.org/10.1371/journal.pone.0024676>
- 627 Wickham, H. (2011). Ggplot2. *Wiley Interdisciplinary Reviews: Computational Statistics*,  
628 3(2), 180–185. <https://doi.org/10.1002/wics.147>
- 629 Wickham, H., Averick, M., Bryan, J., Chang, W., McGowan, L., François, R., ... Yutani, H.  
630 (2019). Welcome to the Tidyverse. *Journal of Open Source Software*, 4(43), 1686.  
631 <https://doi.org/10.21105/joss.01686>
- 632
- 633

634 **Figures Legends**

635

636 **Figure 1. (A) Flowchart of experimental overview.** A set of 40 RILs were grown at  
637 temperature 16°C, 20°C, 24°C, and 26°C. separately, at L4 and adult stage, individual RIL  
638 with 3 replicates per RIL were photographed under microscope. Subsequently, the body-size  
639 traits of the RILs were determined using ImageJ. **(B) The mean value per genotype of four**  
640 ***C. elegans* body-size traits** across different temperature and developmental stages. The x-axis  
641 represents strains used while y-axis represent the mean value of the individual strains in their  
642 respective traits. Both parents are depicted in blue (CB4856) and orange (N2), while the RILs  
643 are grey. Treatment combination (temperature x developmental stages) are depicted on the  
644 facet above the plot box. AD = Adult; 16:AD = Grown in 16°C and measured at adult stage.

645

646 **Figure 2. (A) The number of transgressive lines of eleven body-size traits** in *C. elegans*  
647 across temperatures and developmental stages. The traits are on the x-axis while y-axis  
648 represents the number of transgressive lines based on multiple t-test of traits in each  
649 individual lines against both parents (p.adjust FDR < 0.05). Colours represent the  
650 temperatures treatment, corresponding to the legend on the right side. **(B) The number of**  
651 **transgressive traits found in the RIL population** per treatments combination (temperature-  
652 developmental stage). The temperature is on the x-axis while y-axis represents how many  
653 transgression found within those temperatures. Developmental stages are depicted on the  
654 above side of the graph. **(C) Broad-sense vs narrow-sense heritability** of body-size traits  
655 across temperature and developmental stages. On the x-axis are narrow sense heritability and  
656 y-axis are broad-sense heritability. Colours represent traits as depicted on the legend at the  
657 bottom of the plot. Shapes represent the significant of broad-sense heritability: dots= not  
658 significant; triangle = significant. The dashed line is added as visual reference.

659

660 **Figure 3. (A) QTLs found for body-size traits in the 40 RILs.** The x-axis represents the  
661 position of the QTL in mega base pairs (Mbp) for each chromosome and y-axis displays the  
662 corresponding significant QTL. In total 18 QTL were found with  $-\log_{10}(p)$  score ranging from  
663 3.44 to 6.49 ( $-\log_{10}(p)$  threshold 3.4, FDR = 0.05). Shapes represent genotype effect: dots:  
664 CB4856; triangles: N2. **(B) Allelic effects of QTL** for body length, body volume, and  
665 surface area of the nematode in adult stage at 26°C at the pek marker location. RILs that have  
666 N2 marker at this locus relatively have bigger body size compared to those that have CB4856  
667 marker. The genetic variation on chromosome I can explain 30 to 37% of the variation in  
668 body length, body volume, and surface nematode at that condition. **(C) QTL profile of**  
669 **length/width ratio.** The QTL analysis were performed across four temperatures (16°C, 20°C,  
670 24°C, 26°C) and two developmental stages (L4 and adult). X-axis displays genomic position  
671 in the chromosome corresponding to the box above the line while y-axis represents the -  
672  $\log_{10}(p)$  score. Box in the right graph show the developmental stages. Blue line represents  
673 QTL at 16°C, light blue line at 20°C, orange line at 24°C, and red line at 26°C. Black-dash  
674 line represents  $-\log_{10}(p)$  threshold (FDR = 0.05).

675

676 **Figure 4. (A) QTL plot of length procorpus and width pharynx at adult stage in**  
677 **temperature range of 16°C to 20°C.** X-axis displays genomic position in the chromosome  
678 corresponding to the box above the line while y-axis represents the  $-\log_{10}(p)$  score. Black-  
679 dash line represents significant  $-\log_{10}(p)$  threshold 3.0. **(B) QTL plot of width pharynx at**  
680 **adult stage in temperature range of 16°C to 20°C.** X-axis displays genomic position in the  
681 chromosome corresponding to the box above the line while y-axis represents the  $-\log_{10}(p)$   
682 score. Black-dash line represents significant  $-\log_{10}(p)$  threshold 3.0. **(C) QTL plot of length**  
683 **isthmus at adult stage in temperature range of 20°C to 26°C.** X-axis displays genomic  
684 position in the chromosome corresponding to the box above the line while y-axis represents

685 the  $-\log_{10}(p)$  score. Black-dash line represents significant  $-\log_{10}(p)$  threshold 3.0. **(D) QTL**  
686 **plot of length isthmus at L4 stage in temperature range of 24°C to 26°C.** X-axis displays  
687 genomic position in the chromosome corresponding to the box above the line while y-axis  
688 represents the  $-\log_{10}(p)$  score. Black-dash line represents significant  $-\log_{10}(p)$  threshold 4.3  
689 (FDR = 0.05). **Box-plots** next to the QTL plots illustrate the **Allelic effects of the QTL** at the  
690 peak marker location. X-axis displays the genotype while y-axis displays the traits explained  
691 in box-plots.

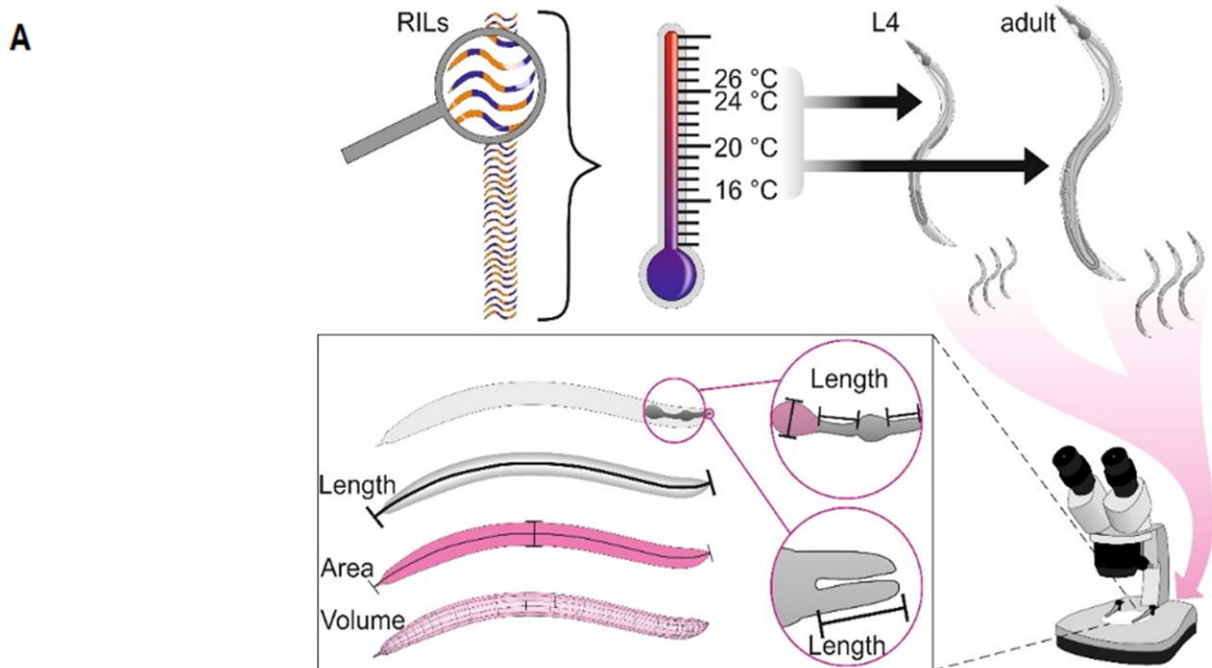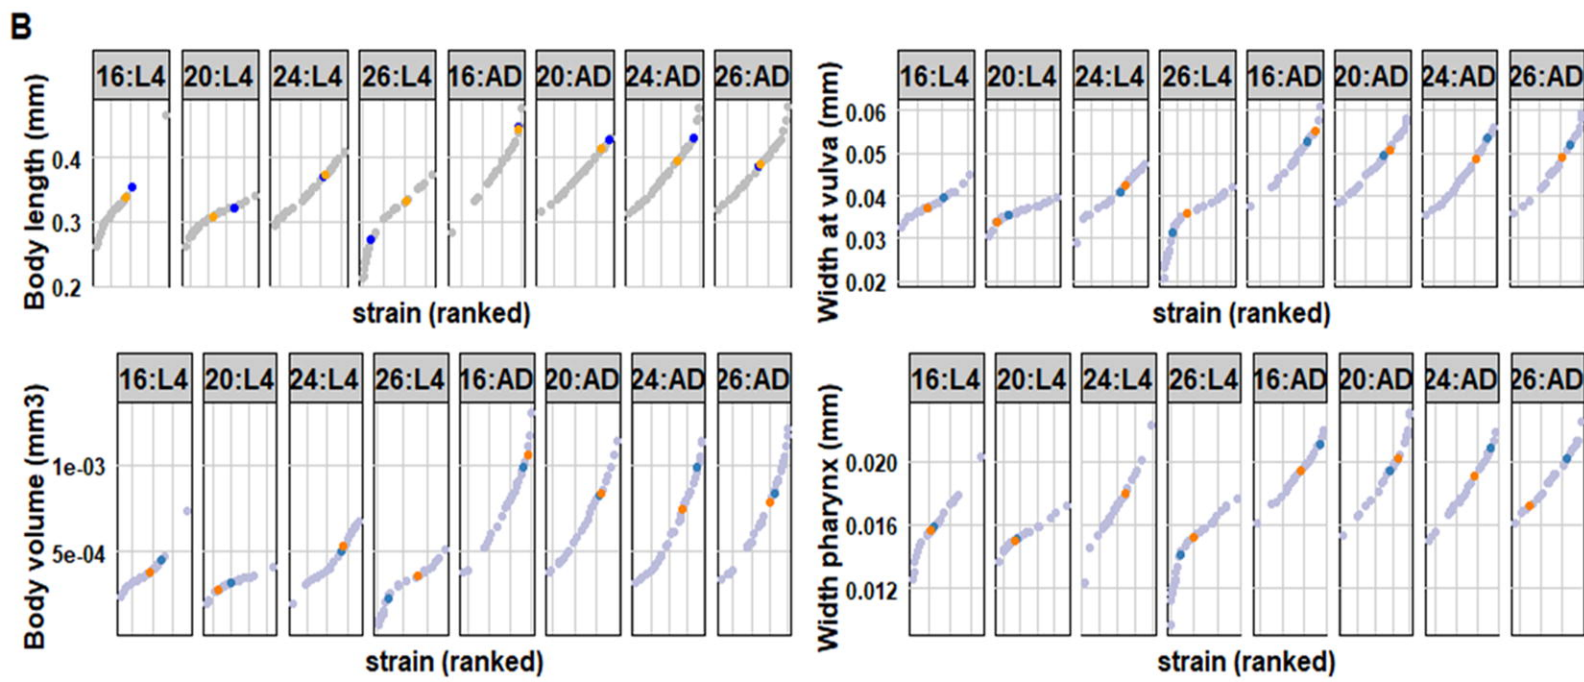

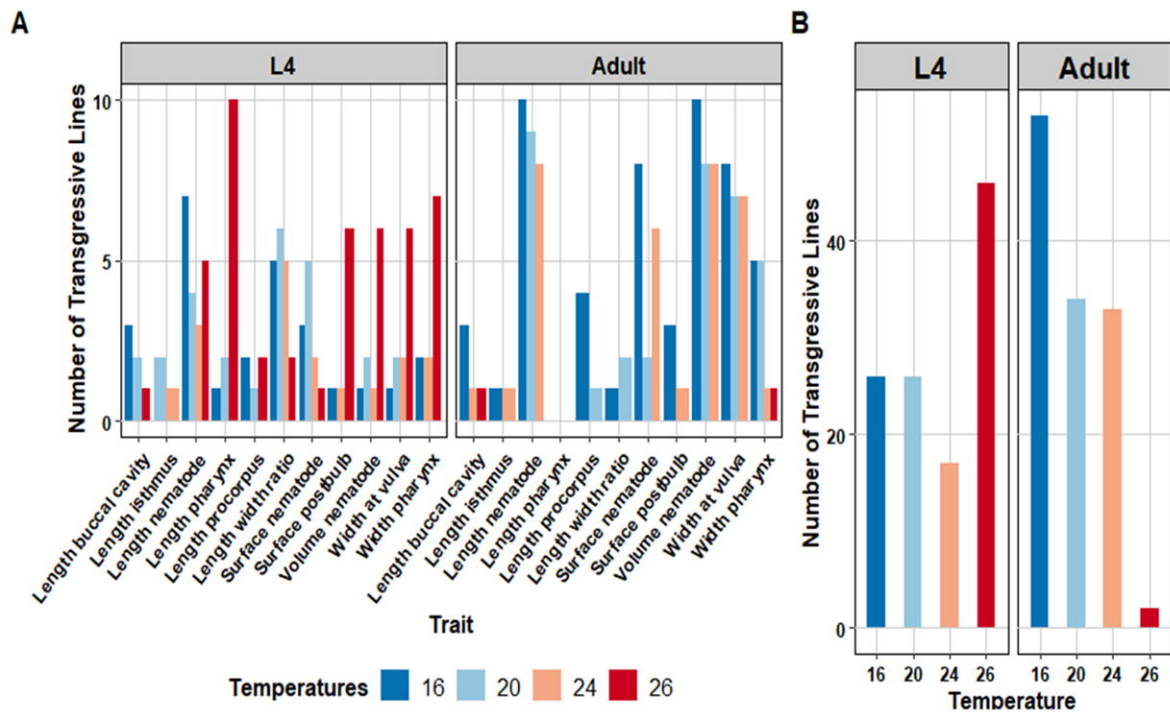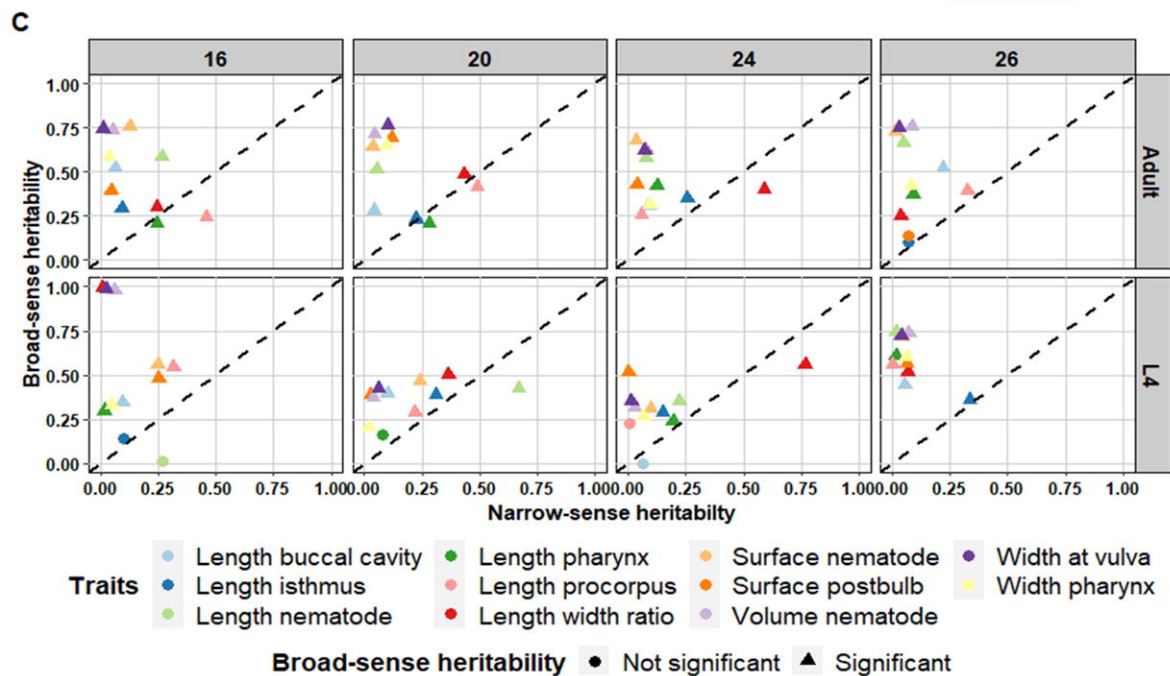

**A**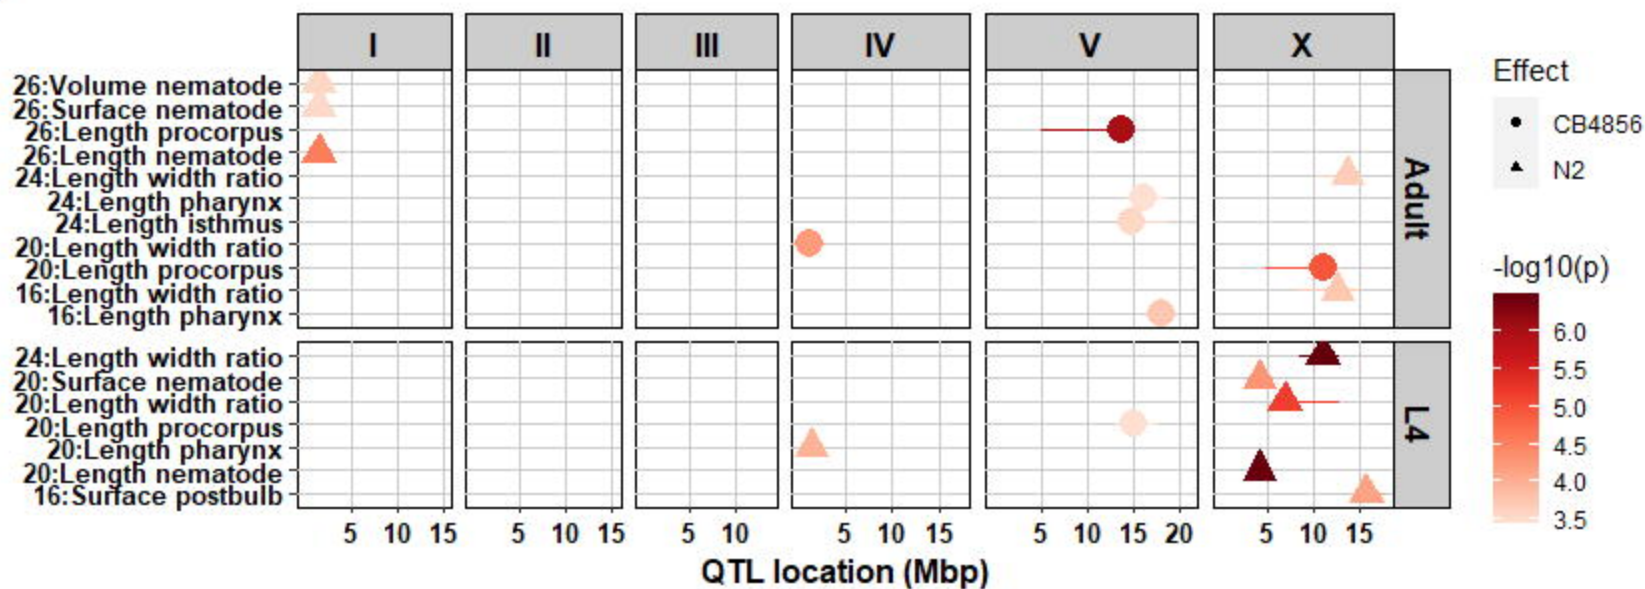**B**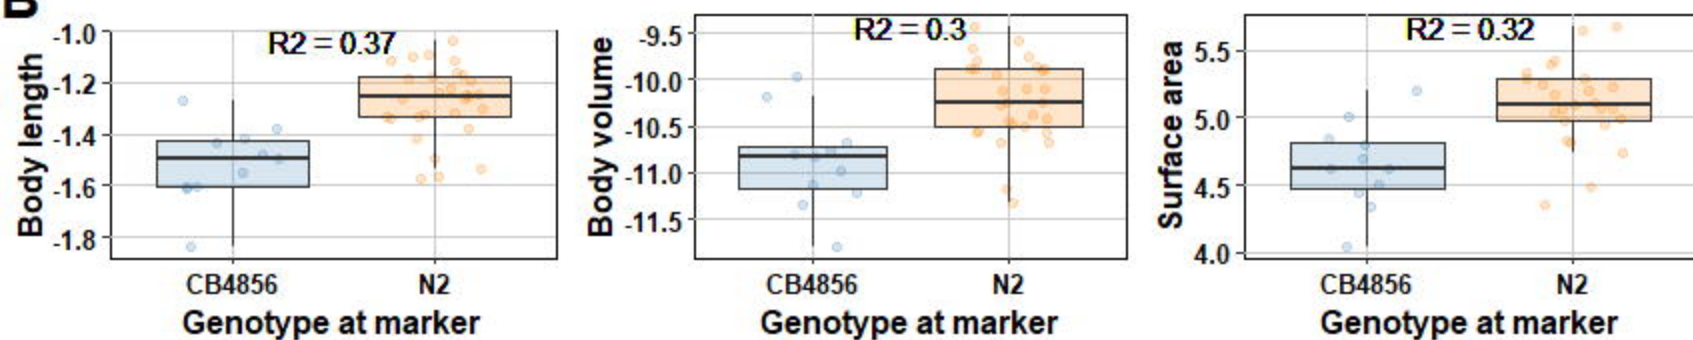**C**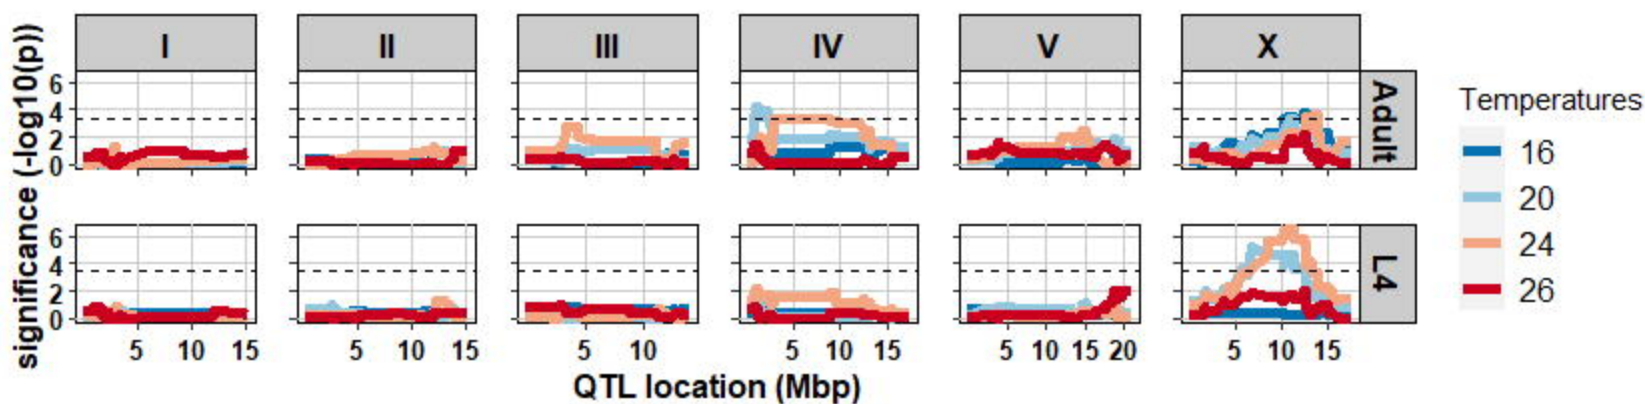



A

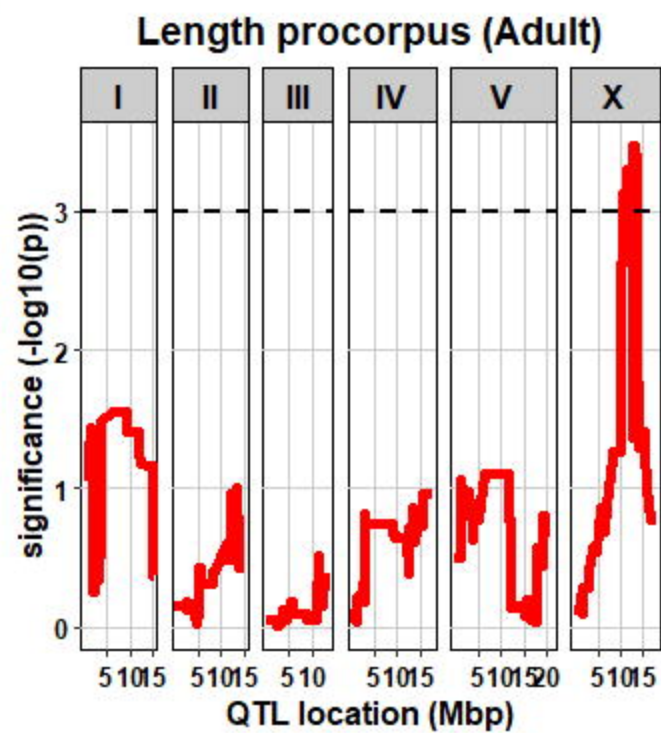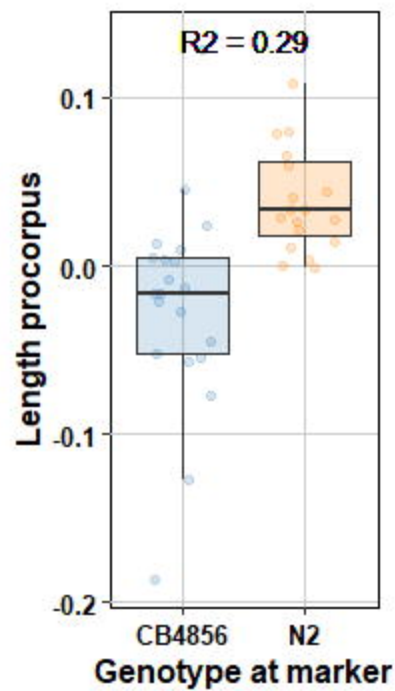

B

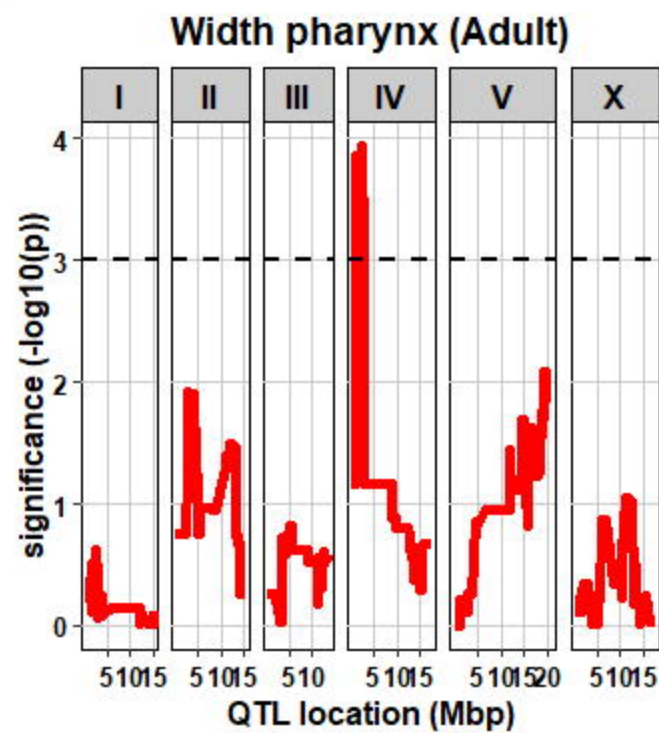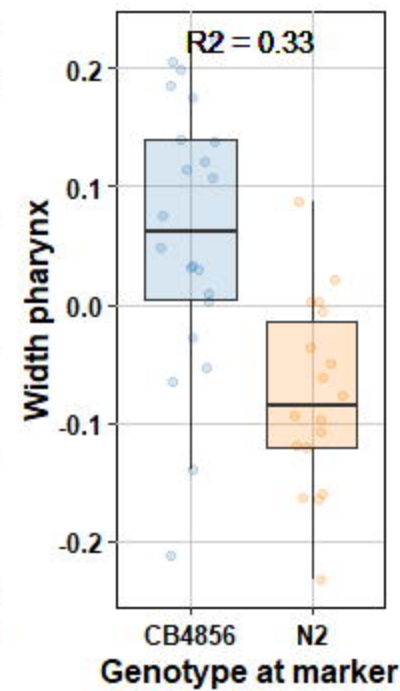

C

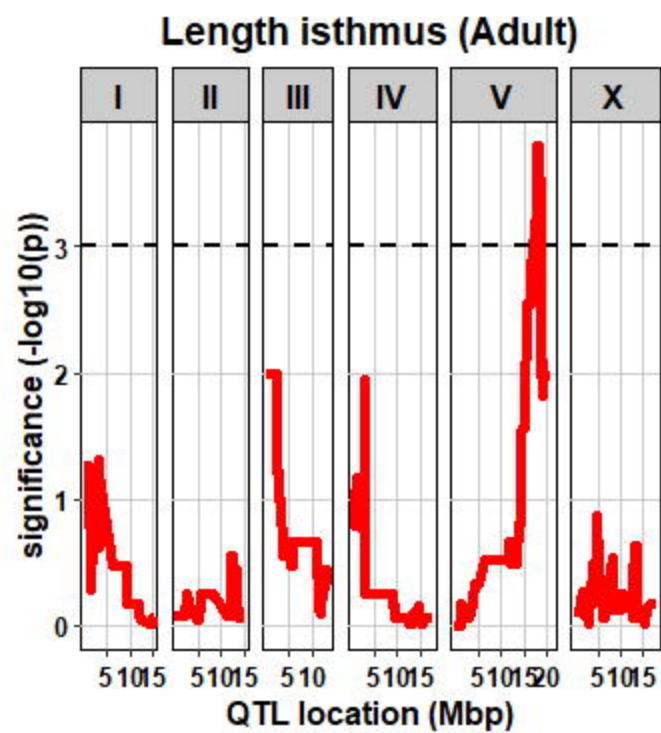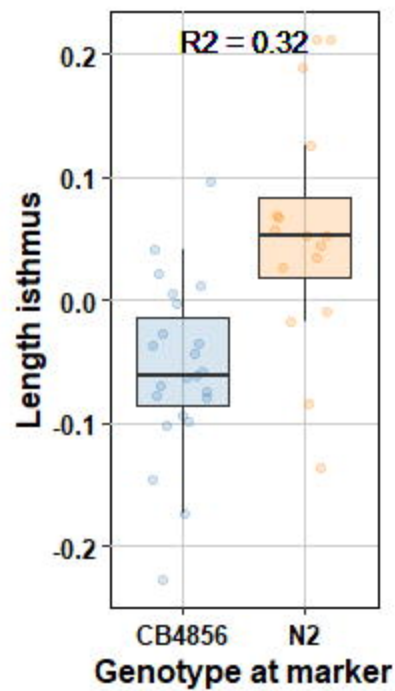

D

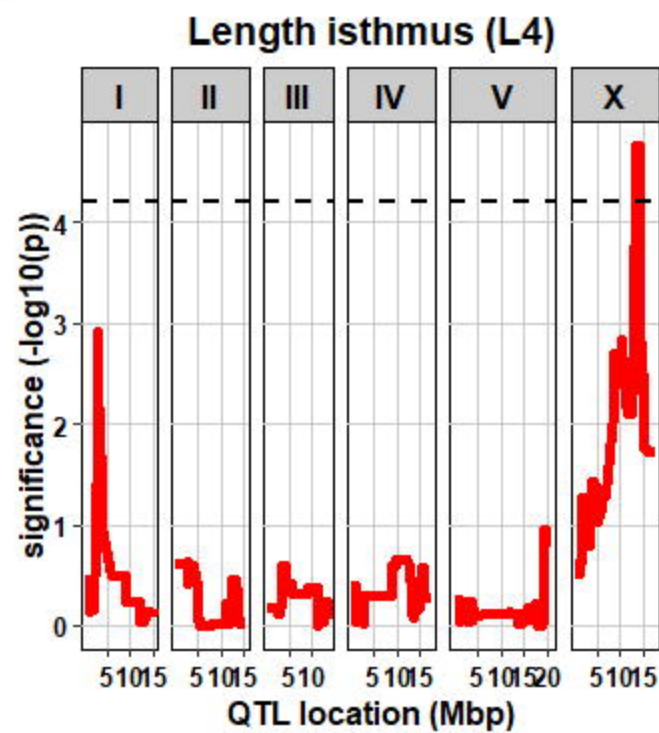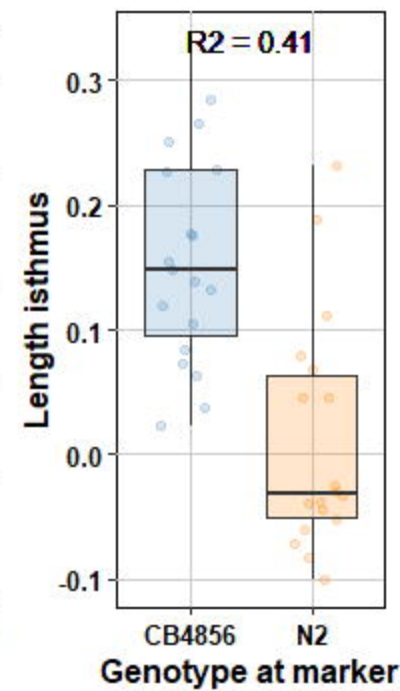

Source: https://www.biorxiv.org/content/10.1101/2021.04.21.440777v2.full.pdf
