1 **The genetic architecture underlying body-size traits plasticity over different**  
2 **temperatures and developmental stages in *Caenorhabditis elegans***

3 Muhammad I. Maulana<sup>1</sup>, Joost A.G. Riksen<sup>1</sup>, Basten L. Snoek<sup>1,2</sup>, Jan E. Kammenga<sup>1,3</sup>, Mark  
4 G. Sterken<sup>1,3</sup>

5

6 <sup>1</sup>Laboratory of Nematology, Wageningen University, Droevendaalsesteeg 1, 6708 PB  
7 Wageningen, The Netherlands

8 <sup>2</sup>Theoretical Biology and Bioinformatics, Utrecht University, Padualaan 8, 3584 CH Utrecht,  
9 The Netherlands

10 <sup>3</sup>Corresponding authors

11

12 **Keywords:** *Caenorhabditis elegans*, body-size traits, temperature, QTL, plasticity

13 **Abstract**

14 Most ectotherms obey the temperature-size rule, meaning they grow larger in a colder  
15 environment. This raises the question of how the interplay between genes and temperature  
16 affect the body size of ectotherms. Despite the growing body of literature on the physiological  
17 life-history and molecular genetic mechanism underlying the temperature-size rule, the  
18 overall genetic architecture orchestrating this complex phenotype is not yet fully understood.  
19 One approach to identify genetic regulators of complex phenotypes is Quantitative Trait  
20 Locus (QTL) mapping. Here, we explore the genetic architecture of body size phenotypes,  
21 and plasticity of body-size phenotypes in different temperatures using *Caenorhabditis elegans*  
22 as a model ectotherm. We used 40 recombinant inbred lines (RILs) derived from N2 and  
23 CB4856, which were reared at four different temperatures (16°C, 20°C, 24°C, and 26°C) and  
24 measured at two developmental stages (L4 and adult). The animals were measured for body  
25 length, width at vulva, body volume, length/width ratio, and seven other body-size traits. The  
26 genetically diverse RILs varied in their body-size phenotypes with heritabilities ranging from  
27 0.0 to 0.99. We detected 18 QTL underlying the body-size traits across all treatment  
28 combinations, with the majority clustering on Chromosome X. We hypothesize that the  
29 Chromosome X QTL could result from a known pleiotropic regulator – *npr-1* – known to  
30 affect the body size of *C. elegans* through behavioral changes. We also found five plasticity  
31 QTL of body-size which three of them colocalized with some body-size QTL at certain  
32 temperature. In conclusion, our findings shed more light on multiple loci affecting body size  
33 plasticity and the possibility of co-regulation of traits and traits plasticity by the same loci  
34 under different environment.

## 35 **Introduction**

36           The body size of ectotherms such as invertebrates, insects and fish are negatively  
37 correlated with their ambient temperature, where warmer environments result in smaller  
38 body-size. Besides body-size, the ectotherms' life-history traits are also strongly affected by  
39 temperatures. Phenotypic plasticity (the phenotypes that can be expressed by a single  
40 genotype at different environmental conditions) due to temperature changes has been studied  
41 widely for many different ectotherms, including evolutionary, ecological, physiological, and  
42 molecular investigations (Beldade et al., 2011; Callahan et al., 2005; Lafuente & Beldade,  
43 2019; Scheiner, 1993; Via et al., 1995).

44           In particular, body size plasticity has been studied well, aiming to understand why  
45 ectotherms grow larger at lower temperatures, a process called the temperature-size rule  
46 (Angilletta & Dunham, 2003; Atkinson, 1994; Ghosh et al., 2013; Van Voorhies, 1996).  
47 Atkinson, 1994 gathered results on the temperature-size rules phenotype in ectotherms from  
48 extensive number of studies and showed that 83% of the studies described that colder  
49 temperature resulted in significantly bigger body size. The same pattern of increased size at  
50 lower temperature was also observed in many insects and arthropods for body size and egg  
51 size (Azevedo et al., 2002; Azevedo et al., 1998; Czarnoleski et al., 2017; Ellers & Driessen,  
52 2011; Fischer et al., 2006; Klok & Harrison, 2013; Steigenga et al., 2005). Although allelic  
53 variants and genes have been found that play an important role in body size plasticity  
54 (Bochdanovits et al., 2003; Ghosh et al., 2013; Lafuente et al., 2018; Li et al., 2006), the  
55 genetic architecture underlying this phenomenon is not fully uncovered yet.

56           Nematodes are not exceptional to this phenomenon. For instance, the nematode  
57 *Caenorhabditis elegans*, showed a 33% larger body size when grown at 10°C compared to  
58 nematodes grown at 25°C (Van Voorhies, 1996) and other temperatures (i.e 24°C) (Gutteling  
59 et al., 2007b; Kammenga et al., 2007). Part of this phenotypic variation in lower-temperature-

60 dependent body size was caused by natural genetic variation in the calpain-like protease *tra-3*  
61 (Kammenga et al., 2007). Furthermore, the laboratory wide-used CB4856 strain are naturally  
62 smaller than N2 strain when grown at standard laboratory temperature which is associated  
63 with the variation in *npr-1* allele (Andersen et al., 2014).

64 Overall, *C. elegans* is an attractive organism for studying the genetics of plasticity to  
65 temperature. Its small genome, rapid life cycle (3.5 days at 20°C), genetic tractability, and a  
66 wealth of available experimental data have made this nematode a powerful platform to study  
67 the genetics underlying complex traits (Gaertner & Phillips, 2010; Snoek et al., 2020).  
68 Besides, *C. elegans* can be maintained completely homozygous, produce many offspring  
69 (200-300 offspring per self-fertilizing hermaphrodite), and can be outcrossed with rarely  
70 occurring males (Petersen et al., 2015; Sterken et al., 2015; Gaertner & Phillips, 2010).  
71 Furthermore, there are many temperature-related trait differences between two widely used  
72 divergent strains: N2 and CB4856. More specifically, studies reported that CB4856 and N2  
73 differed in their response to temperatures in several life-history traits such as time to  
74 maturity, fertility, egg size, body size, lifespan, and also in gene expression regulation  
75 (Gutteling et al., 2007a; Gutteling et al., 2007b; Jovic et al., 2017; Kammenga et al., 2007; Li  
76 et al., 2006; Rodriguez et al., 2012; Viñuela et al., 2011). Despite these findings, we still do  
77 not have a full overview of the loci that affect plasticity at a larger range of different  
78 temperatures.

79 To further elucidate the genetic architecture of temperature affected body size  
80 plasticity in *C. elegans*, we selected 40 RILs derived from N2 and CB4856 parents (Li et al.,  
81 2006) to study the plasticity and genetic regulation of body-size traits (body-size and some  
82 internal organs size) under four temperatures and two developmental stages. First, we sought  
83 to investigate the effect of temperature and developmental stages to the reaction norms of the  
84 body-size traits, correlation between body size-traits within and between temperature-

85 developmental stages, as well as investigating genetic parameters (heritability and  
86 transgressive segregation) of body size-traits and body-size plasticity. Subsequently, we  
87 investigated the genomic regions underlying these body-size traits across temperature-  
88 developmental stage combinations and plasticity traits under three temperature ranges. We  
89 found 18 QTL of body-size traits at certain temperature and developmental stages and five  
90 plasticity QTL. Many of the QTL for different traits colocalized at the same position within  
91 temperatures suggesting a pleiotropic effect or close linkage. Furthermore, some of the  
92 plasticity QTL also colocalized with body-size QTL in certain temperature, suggesting a  
93 possibility of co-regulatory loci underlying plasticity traits and traits itself. Moreover, the  
94 colocalizing QTL across temperatures indicating a possible temperature sensitive regulatory  
95 mechanism.

96 **Materials and methods**

97

98 *Mapping population*

99 The mapping population used in this study consisted of 40 RILs from a 200 RIL population  
100 derived from crossing of N2 and CB4856. These RILs are chosen because they resembled the  
101 smallest set of population with highest genetic diversity. The RILs were generated by (Li et  
102 al., 2006) and most were genotyped by sequencing, with a genetic map consisting of 729  
103 informative (indicating a cross-over) Single Nucleotide Polymorphism (SNP) markers  
104 (Thompson et al., 2015). The strain names and genotypes can be found in Figure S1.

105 We confirmed that long-range linkage, between markers on different chromosomes,  
106 was not present in the population, by studying the pairwise correlation of the genetic markers  
107 in the used population (Figure S2).

108

109 *Cultivation and experimental procedures*

110 *C. elegans* nematodes were reared following standard culturing practices (Brenner, 1974).  
111 RILs were kept at 20°C before experiments and three days before starting an experiment a  
112 starved population was transferred to a fresh NGM plate. An experiment was started by  
113 bleaching the egg-laying population, following standard protocols (Brenner, 1974). After  
114 bleaching, nematodes were placed on fresh NGM plate seeded with *E. coli* OP50. From that  
115 point onward, RILs were grown at four different temperatures: 16°C, 20°C, 24°C, or 26°C. At  
116 two time-points of developmental stages (L4 and adult) per temperature, microscope pictures  
117 (Leica DM IRB, AxioVision) were taken of three nematodes per line per temperature that  
118 were mounted on agar pads. The timepoints were chosen such that L4 and young adult  
119 nematodes were photographed, this was confirmed by mid-L4 vulva shape and adult vulva-  
120 shape and germline. The exact times are indicated in the sample data file (Table S1).

121

122 *Trait measurements and calculations*

123 The number of RILs subjected to treatments per developmental stage was 40, except for  
124 treatment of temperature 24°C at L4 stage, where 39 RILs were used. Per life-stage and  
125 temperature we took measurements of 3 replicate individuals per RIL, and 6 replicate  
126 individuals of the parental lines N2 and CB4856 (from two independent populations). This  
127 resulted in 1056 pictures.

128 To quantify traits, the pictures were loaded into ImageJ (version 1.51f) and traits were  
129 manually measured. In total, nine body-size traits were measured: (i) body length, (ii) width at  
130 vulva, (iii) length of the pharynx, (iv) width of the pharynx, (v) length of the isthmus, (vi)  
131 length of the buccal cavity, (vii) length of the procorpus, (viii) surface postbulb, and (ix)  
132 surface nematode. To convert the measurement data from pixels to millimeters (mm), a figure  
133 of scale (in mm) was loaded to imageJ. Subsequently, the resolution of *C. elegans* picture and  
134 the scale picture were equalized. Next, in ImageJ we determined how many pixels were  
135 represented by 0.1 mm. This step was repeated 10 times and the average value was taken as  
136 standard conversion scale from pixels to mm. We also calculated body volume (assuming the  
137 nematodes body resembles a tube) as

$$V_{body} = \pi * \left(\frac{L_{vulva}}{2}\right) * L_{body}$$

138 and the length/width ratio (L/W ratio) as the ratio of body length/width at vulva. For none of  
139 the traits we have a complete dataset due to difficulties in obtaining accurate measurements,  
140 the number of missing values for each trait are as follows: body length = 67; width at vulva =  
141 102; length pharynx = 76; length isthmus = 220; surface postbulb = 219; surface nematode =  
142 232; length buccal cavity = 193; length procorpus = 242; body volume = 135; width pharynx =  
143 65; length/width ratio = 135. All raw data can be found in Table S2.

144

145 *Analytical Software Used*

146 Phenotypic data was analyzed in “R” version 3.5.2x64 using custom written scripts (R core  
147 Team 2017). The script is accessible via Gitlab:  
148 [https://git.wur.nl/published\\_papers/maulana\\_2021\\_4temp](https://git.wur.nl/published_papers/maulana_2021_4temp). R package used for organizing data  
149 was the tidyverse (Wickham et al., 2019), while all plots were made using ggplot2 package  
150 (Wickham, 2011), except for heatmaps in Figure S3 which were made using the “heatmap ()”  
151 function provided in R. The data was deposited to WormQTL2 where it can be explored  
152 interactively ([www.bioinformatics.nl/WormQTL2](http://www.bioinformatics.nl/WormQTL2)) (Snoek et al., 2020).

153

154 *Correlation analysis*

155 The correlation between the traits in all treatment combinations was determined by the  
156 Pearson correlation index and plotted in a correlation plot. To correct for the effect of outliers  
157 (effect of very high or low value of single observation), we normalized the data as follows:

$$X_{i,j} = \log (x_{i,j} / \mu)$$

158 where  $x$  is individual observation of the traits in temperature  $i$  (16°C, 20°C, 24°C, 26°C) and  
159 developmental stage  $j$  (L4, adult) while  $\mu$  is the mean value of all traits.

160

161 *Transgressive segregation*

162 To determine transgressive segregation of the traits among RILs panel, we performed multiple  
163 t-tests comparing all RIL panel to both parents for all traits per temperature and  
164 developmental stages. Transgression was defined when the traits of individual RIL is  
165 significantly different than both parents (p.adjust with FDR < 0.05; equal variance not  
166 assumed).

167

168 *Heritability estimation*



169 Broad-sense and narrow-sense heritability of the phenotypic traits over RIL lines was  
170 calculated using Restricted Maximum Likelihood (REML) model to explain variation of the  
171 traits across the RIL lines (Kang et al., 2008; Rockman et al., 2010). The broad sense  
172 heritability was calculated according to the following equation:

$$173 \quad H^2 = \left( \frac{V_g}{V_g + V_e} \right)$$

174 where  $H^2$  is the broad-sense heritability,  $V_g$  is the genotypic variation explained by the RILs,  
175 and  $V_e$  is residual variation. The  $V_g$  and  $V_e$  were estimated by the lme4 model  $x_{\text{norm}} \sim 1 +$   
176  $(1|\text{strain})$  (Bates et al., 2015). The input data was normalized using  $\log_2$  phenotype value to  
177 better fit the normality assumption.

178 Narrow-sense heritability is defined as the total variation in the population which is  
179 captured by additive effects. We calculated these using the heritability package in R, which  
180 estimates narrow-sense heritability based on an kinship matrix (Kruijer et al., 2014). The  
181 kinship matrix was calculated using the kinship function from the Emma package in R (Carta  
182 et al., 2011).

183 The significances of broad and narrow-sense heritability were determined by  
184 permutation analysis where the traits values were randomly assigned to the RILs. Over these  
185 permuted values, the variation captured by genotype and residuals were then calculated.  
186 This permutation was done 1,000 times for each trait. The result obtained were used as the by-  
187 chance-distribution and an FDR= 0.05 threshold was taken as the 50<sup>th</sup> highest value.

188

### 189 *QTL mapping*

190 QTL mapping was performed using custom script in R using fitted single marker model as  
191 follows:

$$\mu_{i,j} = x_i + E_j$$

192 where  $\mu$  is the averaged of all strains replicates in terms of their body size-traits  $i$ , of RIL  $j$  ( $N$   
193 = 40) on marker location  $x$  ( $x= 1, 2, 3, \dots, 729$ ).

194 Detection of QTL was done by calculating a  $-\log_{10}(p)$  score for each marker and each  
195 trait. To increase the detection power, all the values were  $\log_2$  normalized mean trait values in  
196 temperature. To estimate empirical significance of  $-\log_{10}(p)$ , the traits were randomly  
197 permuted value over the RILs 1,000 times. The calculation resulted in a significance  
198 threshold with false discovery rate (FDR) = 0.05 at a  $-\log_{10}(p)$  of 3.4 for QTL detection.

199

#### 200 *Trait plasticity calculation*

201 We divided plasticity ranges into three adjacent temperature groups: 16°C to 20°C, 20°C to  
202 24°C, and 24°C to 26°C. Trait plasticity was defined as ratio between the trait mean value per  
203 nematode strain at 16°C to 20°C, 20°C to 24°C, and 24°C to 26°C.

204

#### 205 *Heritability estimation of trait plasticity*

206 Broad-sense and narrow-sense heritability of trait plasticity was calculated using the same  
207 model as in phenotypic traits heritability above. The broad sense heritability was calculated  
208 according to the following equation:

209

$$Hp^2 = \left( \frac{V_g}{V_g + V_e} \right)$$

210 where  $Hp^2$  is the broad-sense heritability of trait plasticity,  $V_g$  is the genotypic variation  
211 explained by the RILs, and  $V_e$  is residual variation. The  $V_g$  and  $V_e$  were estimated by the lme4  
212 model  $x_{\text{norm}} \sim 1 + (1|\text{strain})$  (Bates et al., 2015).

213 The narrow-sense heritability was estimated based on kinship matrix calculated using  
214 the kinship function from the Emma package in R (Carta et al., 2011). The significances of  
215 broad and narrow-sense heritability were determined by permutation analysis as in phenotypic

216 heritability estimation. The calculation was done for all temperature ranges (16°C to 20°C,  
217 20°C to 24°C, and 24°C to 26°C) in adult and L4 stage.

218

### 219 *QTL mapping for trait plasticity*

220 Plasticity QTL mapping was performed using fitted single marker model as follows

$$\mu_{i,j} = x_i + E_j$$

221 where  $\mu$  is the averaged of all strains replicates in terms of their body size-traits  $i$ , of RIL  $j$  ( $N$   
222 = 40) on marker location  $x$  ( $x= 1, 2, 3, \dots, 729$ ).

223 Plasticity QTL detection was done by calculating a  $-\log_{10}(p)$  score for each marker and  
224 each trait. The calculation was done per temperature ranges. Empirical significance of -  
225  $\log_{10}(p)$  was estimated by randomly permuted value over the RILs 1,000 times. The false  
226 discovery rate (FDR) = 0.05 at a  $-\log_{10}(p)$  of 3.0 was found as the significant threshold for  
227 plasticity QTL detection.

228

### 229 *Statistical power calculation*

230 To determine the statistical power of our QTL and plasticity QTL dataset at the set threshold,  
231 we performed power analysis using the genetic map of the strains ( $n = 40$ ) used per condition  
232 as in (Sterken et al., 2017). We simulated ten QTL per marker location that explained 20-80%  
233 of the variance, with increments of 5% (20%, 25%, 30%, ..., 80%). Random variation was  
234 introduced based on a normal distribution with  $\sigma = 1$  and  $\mu = 0$ . Peaks were simulated  
235 according to effect-size, for example, a peak corresponding to 20% explained variation was  
236 simulated in this random variation. Based on the simulation, we analysed the number of  
237 correctly detected QTL, the number of false positives as well as undetected QTL. In addition,  
238 the precision of effect-size prediction and the QTL location were determined. The threshold

239 used was based on 1000x permutation analysis  $-\log_{10}(p) > 3.4$  for individual QTL and -

240  $\log_{10}(p) > 3.0$  for plasticity QTL. The results of this calculation is presented in Table S5.

241

242 **Results**

243 ***C. elegans* body size traits vary across temperatures and developmental stages**

244 To investigate the impact of different genetic background, ambient temperature  
245 condition, and developmental stages on the body-size traits, we used a panel of 40 RILs  
246 derived from a cross between Bristol strain (N2) and Hawaiian strain (CB4856) (Figure S1  
247 and S2) (Li et al., 2006). Each individual RIL was grown under four different temperature  
248 regimes (16°C, 20°C, 24°C, and 26°C). Once reaching the L4 and adult stage, we took pictures  
249 of each RIL with three individual replicates per strain and determined the body size  
250 parameters using ImageJ (Figure 1A; see materials and methods).

251 The eleven body-size traits showed a dynamic variation across RILs when measured in  
252 different temperatures and developmental stages (Figure 1B; Figure S3), suggesting that these  
253 traits are indeed plastic. In general, we observed similar dynamic pattern of traits plasticity  
254 across RILs in L4 stage including N2 and CB4856. The trait values dropped from 16°C to  
255 20°C, then increased from 20°C to 24°C, and dropped again from 24°C to 26°C. On the other  
256 hand, the trait values in adult stages show no similar pattern across the RILs, suggesting that  
257 the traits plasticity in adult stage are more sensitive to genetic background, whereas in the  
258 larvae the environment seems to play a larger role (Figure 1B; Figure S3). For several major  
259 body-size such as body length, body volume, width at vulva, and surface area of the  
260 nematodes of adult worms, we found that CB4856 did not completely follow the temperature-  
261 size rules (a decrease curve from 16-20°C, followed by an increase from 20-24°C, and  
262 decreased from 24-26°C) whereas Bristol N2 consistently grew bigger at lower temperatures.  
263 This gives a new insight to the finding from previous study (Gutteling, et al., 2007b;  
264 Kammenga et al., 2007), where CB4856 found to deviate the temperature-size rule, which  
265 that's not always the case. This results shows that N2 body size was less plastic than CB4856.

266 To get insight into the relations between the traits measured, we performed a  
267 correlation analysis for all pairs of traits at the two developmental stages. We found that the  
268 level of between trait-correlation differed between L4 and adult stage, where temperature  
269 seems to be the main driving factor (Figure S4). Both in L4 and adult stage, the body-size  
270 traits displayed a strong positive correlation within the same temperature, and strong negative  
271 correlation between different temperatures, suggesting that the variation in the body-size traits  
272 were temperature specific. Interestingly, both in L4 and adult stage, the body-size traits of  
273 worm grown in 16°C and 26°C were separated into several small clusters, while the traits  
274 from 20°C and 24°C treatments formed a single positively correlated cluster. These results  
275 indicated that there were more similar patterns of variation over RILs in temperature 20°C and  
276 24°C. Strongly correlated body-size traits imply that the same quantitative trait loci could be  
277 detected for these traits due to similar patterns of variation in the RILs, temperatures, and  
278 developmental stages.

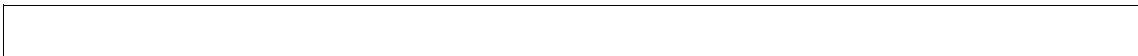

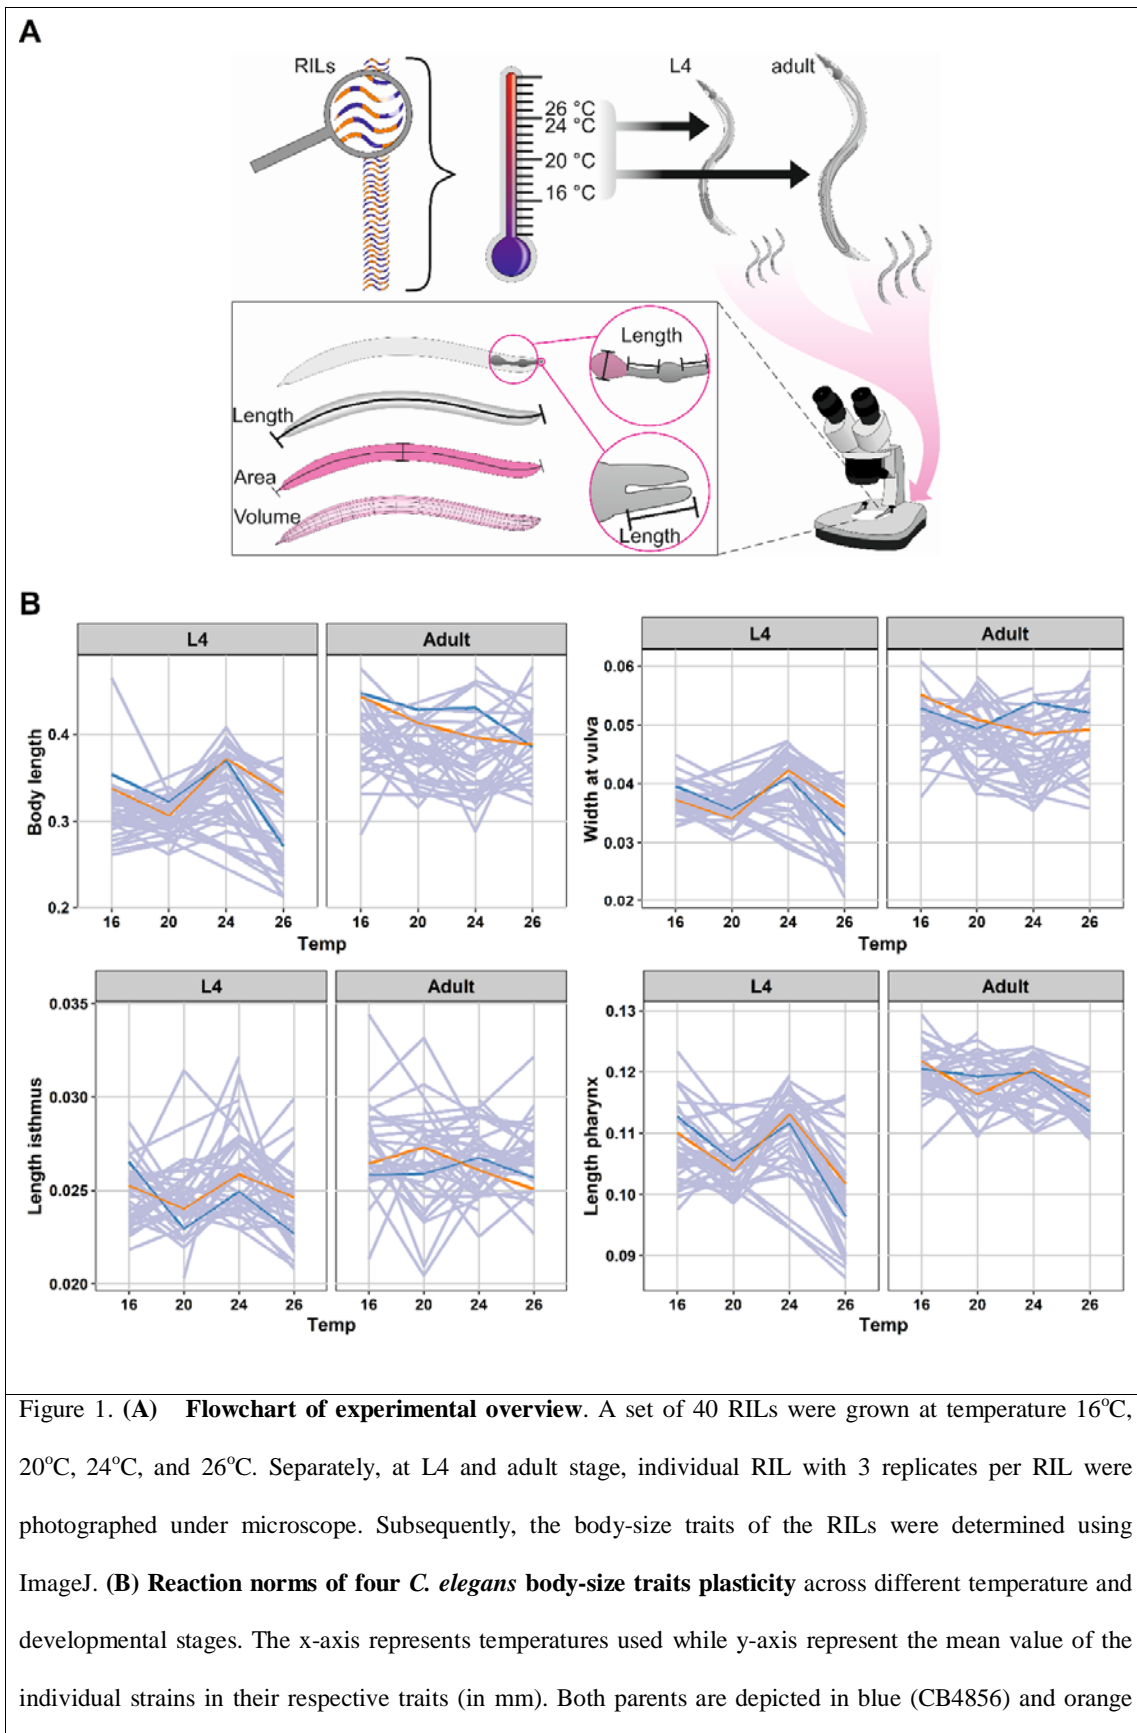

(N2), while the RILs are grey.

279

280 To explore the source of variation of the body-size traits in the RILs population, we  
281 used principal component analysis (PCA) (Figure S5). The PCAs describes the variation of  
282 the traits based on temperatures and genetic background per developmental stage. At the L4  
283 stage, the first principal component captured 45.5% of the variation where the 16°C  
284 temperature animals were most distal from the other temperatures, while the second principal  
285 component captured 24% of the variation where the 24°C and 26°C temperatures were most  
286 distal. We found that at L4 stage, the RILs were more similar in lower temperature (16°C)  
287 while in 20°C, they were distributed across the PC plot. Subsequently, the value of body-size  
288 traits of the nematodes at 24°C were similar to the values at 26°C, but divided into two cluster  
289 (Figure S5). On the other hand, the individual RILs did not show any clear clusters at adult  
290 stage, indicating there was high variation between the RILs as a result of interaction between  
291 environment and the genetic background. This result combined with the correlation analysis  
292 show that there was a substantial variation in the RILs, suggesting that it was possible to  
293 detect QTL controlling the traits.

294

### 295 **Transgressive segregation and heritability indicate a complex genetic architecture** 296 **underlying body-size traits**

297 Upon inspecting the distribution of trait variation in the RILs compared to N2 and  
298 CB4856, we observed high levels of variation exceeding those of the parental strains (Figure  
299 S6). This suggests transgressive segregation within the RIL population. Hence, we tested the  
300 trait values of each RIL versus the parents. We found transgression for almost all traits per  
301 temperature-developmental stage combinations (t-test, p.adjust FDR < 0.05) (Table S3). Our  
302 findings show that the number of two-sided transgressive RILs depended on the combination



303 of temperature and developmental stage (Figure 2A Figure 2B; Table S3). Whereas in the L4  
304 stage the number of transgressive RILs was constant under 16°C, and 20°C, slightly dropped  
305 under 24°C – and then increased at 26°C. Conversely, in the adult stage, the number of  
306 transgressive strains decreased as the temperature increased. Moreover, it shows that the  
307 parental lines have both positive and negative alleles that interact with the environment  
308 leading to a more robust/stable phenotype over a broader temperature range. Using ANOVA,  
309 we found that developmental stage was indeed the factor driving transgression ( $p = 0.0275$ ;  
310  $R^2 = 0.073$  Table 1) whereas temperature alone showed no relation to the transgression ( $p =$   
311  $0.786$ ;  $R^2 = 0.015$ ). These findings indicate environment and age-specific effects on the  
312 regulation of body-size traits.

**Table 1** Results of ANOVA for the number of transgressive lines over temperatures and developmental stages.

| Source                          | Df | Sum Sq | Mean Sq | F value | Pr(>F) | R <sup>2</sup> |
|---------------------------------|----|--------|---------|---------|--------|----------------|
| Temperature                     | 3  | 7.7    | 2.55    | 0.35    | 0.787  | 0.015          |
| Developmental Stage             | 1  | 37.0   | 37.01   | 5.13    | 0.028  | 0.073          |
| Temperature*Developmental Stage | 3  | 52.3   | 17.43   | 2.41    | 0.076  | 0.103          |
| Residuals                       | 56 | 404.4  | 7.22    |         |        |                |

*ANOVA: Analysis of variance; Df: degree of freedom*

313

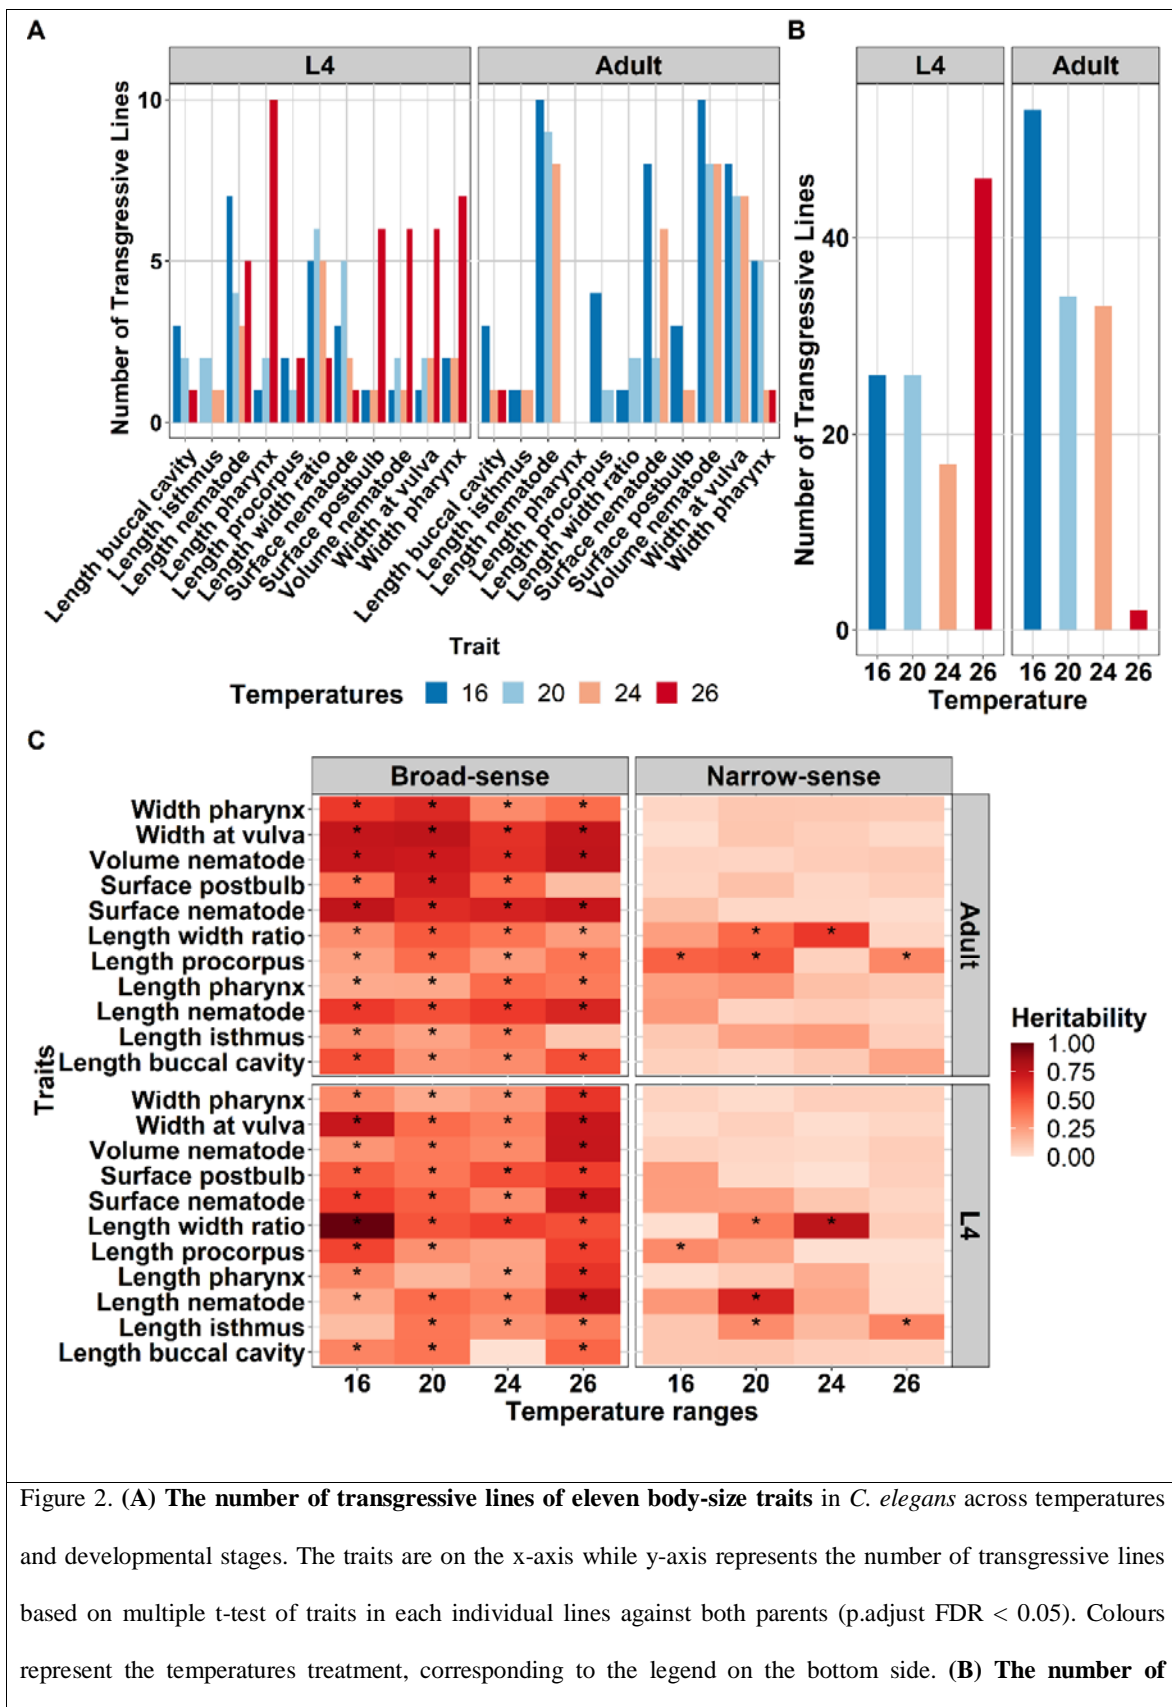

**transgressive traits found in the RIL population** per treatments combination (temperature-developmental stage). The temperature is on the x-axis while y-axis represents how many transgression found within those temperatures. Developmental stages are depicted on the above side of the graph. **(C) Broad-sense and narrow-sense heritability** of body-size traits across temperature and developmental stages. On the x-axis are temperature and on the y-axis are the traits measured. The colour gradient represents the heritability values as depicted on the legend on the right side of the plot. Asterisk (\*) inside the box indicate significant heritability values (FDR0.05 based on 1000 permutations). Developmental stages are depicted on the right side of the plot whereas the types of heritability are on the top.

314

315           Next, to determine the proportion of variance in body-size traits that were caused by  
316 genetic factors, we calculated the broad sense-heritability ( $H^2$ ) of each trait. We found  
317 significant heritability (REML, FDR = 0.05) for 81 out of 88 traits in developmental stage-  
318 temperature combinations. The significant heritability ranged from 0.0 (length buccal cavity  
319 at 24°C in L4) to 0.99 (length/width ratio at 16°C in L4) (Figure 2C; Table S4). Hence, for a  
320 large fraction of traits we could detect a high contribution of genetic factors. In addition to  $H^2$ ,  
321 we calculated the narrow-sense heritability ( $h^2$ ) to identify how much of the variation could be  
322 explained by additive allelic effects. This analysis suggested that there were 11 traits with  
323 significant additive effect (REML, FDR < 0.05; Table S4). For nearly all body-size traits we  
324 detected  $H^2$  well beyond  $h^2$ , indicating a role for epistasis in the genetic architecture of the  
325 traits.

**Table 2** Results of ANOVA for  $H^2$  of all traits over temperatures and developmental stages

| Source                           | Df | Sum Sq | Mean Sq | F value | Pr(>F) | R <sup>2</sup> |
|----------------------------------|----|--------|---------|---------|--------|----------------|
| Temperatures                     | 3  | 0.292  | 0.097   | 2.35    | 0.078  | 0.008          |
| Developmental Stages             | 1  | 0.019  | 0.019   | 0.472   | 0.494  | 0.005          |
| Temperatures*Developmental Stage | 3  | 0.308  | 0.103   | 2.487   | 0.066  | 0.084          |
| Residuals                        | 80 | 3.308  | 0.041   |         |        |                |

*ANOVA: Analysis of variance; Df: degree of freedom; The input data used were the heritability measurements of all traits*

326 To understand the contribution of temperature and developmental stage on heritability  
327 of all traits measured, we conducted an ANOVA (Table 2). The results suggested a trend that  
328 the main factor driving  $H^2$  was temperature ( $R^2 = 0.008$ ,  $p = 0.078$ ) and its combination with  
329 developmental stage ( $R^2 = 0.084$ ,  $p = 0.066$ ). On the other hand, developmental stage showed  
330 little relation to the variation of  $H^2$  ( $R^2 = 0.005$ ,  $p = 0.493$ ). In the adult stage, we observed  
331 there were four traits (width at vulva, body length, body volume, and surface area of  
332 nematodes) which  $H^2$  are relatively robust across all temperatures while in L4 they were  
333 found to be more variable across temperature. These four traits ,were affecting each other and  
334 observed to be positively correlated (Figure S3). Taken together, overall body-size traits show  
335 significant  $H^2$ , indicating a substantial effect of the genetic background on the variation in  
336 these traits in this population. Moreover, the correlation between some traits indicate a shared  
337 genetic architecture between the traits. These results indicate a higher chance of detecting  
338 QTL on the traits measured.

339

#### 340 **QTL underlying body-size traits in *C. elegans* are influenced by temperature and** 341 **developmental stages**

342 To identify underlying loci controlling the variation of body-size traits, we performed  
343 QTL mapping for all the body-size traits measured in the 40 RILs. Analysis of statistical  
344 power showed that our population can detect 80% of true QTL explaining 60% of the  
345 variance (Table S5). Using log-normalized mean values per RIL as input, we found 18  
346 significant QTL ( $-\log_{10}(p) = 3.4$ ,  $FDR = 0.05$ ) with  $-\log_{10}(p)$  scores ranging up to 6.5 in each  
347 temperature and developmental stages (Figure 3, Table S6). We found QTL explaining 28-  
348 53% of variance among the RILs (Table S6). We found 7 QTL in the L4 stage namely surface  
349 area, length pharynx, body length, length procorpus (detected at 20°C), length/width ratio  
350 (detected at 20°C and 24°C), and surface postbulb (detected at 16°C) . For the adult stage, 11

351 QTL were detected for the body-size traits. Here, we found QTL evenly distributed over the  
352 temperatures: two at 16°C, two at 20°C, three at 24°C, and four at 26°C (Figure 3A). Of the 18  
353 significant QTL, eight were located on chromosome X, five QTL on chromosome V, three on  
354 chromosome I and two on chromosome IV.

355 We observed QTL-hotspots for various traits. For example, the chromosome I QTL  
356 (surface area, body volume, and body length) were positively correlated traits, mapped in the  
357 same developmental stage and temperature combination. Hence, this could point to a body-  
358 size QTL, where the N2 genotype was associated with larger body size compared to the  
359 CB4856 genotype (Figure 3B). Interestingly, all QTL on chromosome V were associated with  
360 the size of the feeding-apparatus, were found over various temperatures, and were all  
361 associated with an increased size in CB4856 (Figure 3A; Figure S7). In contrast, traits related  
362 to the overall body size (e.g. volume) were almost exclusively associated with an increased  
363 size due to the N2 allele (Figure 3B).

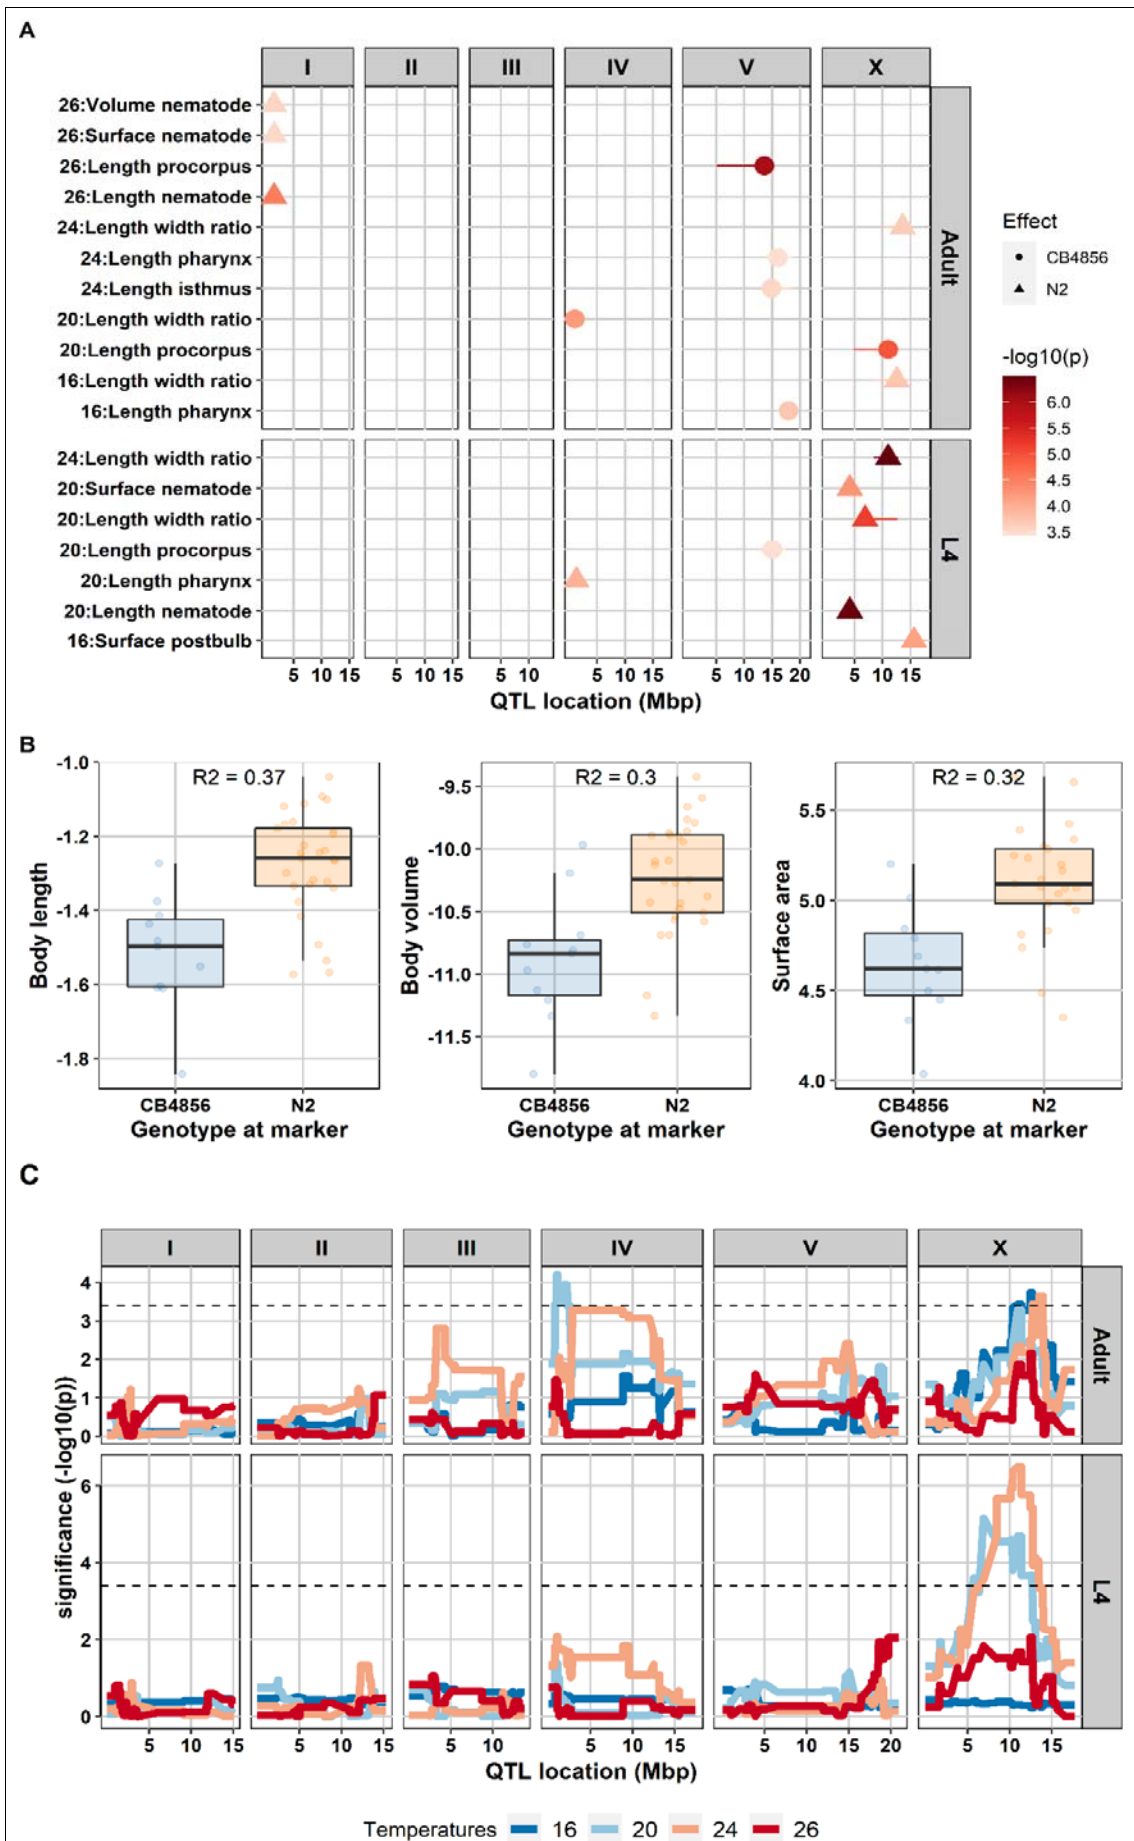

Figure 3. **(A) QTLs found for body-size traits in the 40 RILs.** The x-axis represents the position of the QTL in mega base pairs (Mbp) for each chromosome and y-axis displays the corresponding significant QTL from a single marker model. In total 18 QTL were found with  $-\log_{10}(p)$  score ranging from 3.44 to 6.49 ( $-\log_{10}(p)$  threshold 3.4, FDR = 0.05). Shapes represent genotype effect: dots = CB4856; triangles = N2. **(B) Allelic effects of QTL** for body length, body volume, and surface area of the nematode in adult stage at 26°C at the peak marker location. RILs that have N2 marker at this locus relatively have bigger body size compared to those that have CB4856 marker. The genetic variation on chromosome I can explain 30 to 37% of the variation in body length, body volume, and surface nematode at that condition. **(C) QTL profile of length/width ratio.** The QTL analysis were performed across four temperatures (16°C, 20°C, 24°C, 26°C) and two developmental stages (L4 and adult) using a single marker model. X-axis displays genomic position in the chromosome corresponding to the box above the line while y-axis represents the  $-\log_{10}(p)$  score. Box in the right graph show the developmental stages. Blue line represents QTL at 16°C, light blue line at 20°C, orange line at 24°C, and red line at 26°C. Black-dash line represents  $-\log_{10}(p)$  threshold (FDR = 0.05).

364

365 In line with the indications of the correlation- and heritability analyses, we found  
366 evidence for environment (temperatures), age (developmental stage) and genotype  
367 interactions. For example, for length/width ratio (Figure. 3C) in the adult stage, significant  
368 QTL in chromosome X were detected for the worms grown at 16°C and 24°C, one QTL on  
369 chromosome IV for worms grown at 20°C, and no significant QTL detected at 26°C. When  
370 we mapped the trait in adult worms grown at 16°C, we found a significant QTL on  
371 chromosome X which we did not find in the L4 stage at 16°C. The same result was found for  
372 QTL at temperature 20°C at adult stage on chromosome IV which was not present in L4 stage.  
373 Similar patterns of (dis-) appearance were observed for many traits (Figure S7). Hence, traits  
374 may be regulated by different set of genes (loci) dependent on temperature-environment and  
375 developmental stage. This indicates that there is a considerable effect of genotype-  
376 environment interactions.

377

378 **The RIL population revealed plasticity QTL for several body-size traits**

379 Phenotypic plasticity is the change of the expressed phenotype in different environments. To  
380 determine the amount of variation in body-size plasticity was due to genetic factors, we  
381 calculated the  $H^2$  of each set of neighbouring experimental temperatures: we defined plasticity  
382 as the ratio of the traits in 16°C to 20°C, 20°C to 24°C, and 24°C to 26°C. We found significant  
383  $H^2$  (REML, FDR = 0.05) for trait plasticity for 45 out of 66 traits in developmental stage-  
384 temperature ranges combinations. In contrast, for  $h^2$  of traits plasticity, there were only three  
385 traits (length pharynx, length procorpus, and width pharynx, ad adult stage on temperature  
386 ranges of 16°C to 20°C) with significant additive effect (REML, FDR < 0.05; Table S7). The  
387 significant  $h^2$  values ranged from 0.19 (length pharynx at adult stage on 20°C to 24°C range)  
388 to 1.00 (length/width ratio on 16°C to 20°C in L4 stage) (Figure 4A; Table S7). Consistent  
389 with the patterns observed across temperatures in the L4 versus the adult stages (Figure 1B),  
390 there were fewer significant broad- and narrow-sense heritabilities observed in L4 stage  
391 compared to the adult stage, indicating higher environmental variation of traits plasticity in  
392 L4. In summary, we observed a strong effect of developmental stages to the heritability of  
393 trait plasticity which was also strongly dependent on the body-size trait under study.

**Table 3** Results of ANOVA for  $H^2$  of all trait plasticity over temperatures and developmental stages

| Source                                  | Df | Sum Sq | Mean Sq | F value | Pr(>F) | $R^2$ |
|-----------------------------------------|----|--------|---------|---------|--------|-------|
| Temperatures ranges                     | 2  | 0.044  | 0.022   | 0.407   | 0.6677 | 0.012 |
| Developmental Stages                    | 1  | 0.340  | 0.34    | 6.234   | 0.0153 | 0.092 |
| Temperatures ranges*Developmental Stage | 2  | 0.030  | 0.015   | 0.275   | 0.7605 | 0.008 |
| Residuals                               | 60 | 3.272  | 0.0545  |         |        |       |

*ANOVA: Analysis of variance; Df: degree of freedom; The input data used were the heritability measurements of all traits*

394 In contrast to  $H^2$  values per temperature-trait combination where the main factor  
395 driving the heritability was temperature, in  $H^2$  of plasticity, developmental stage ( $R^2 = 0.092$ ,



396  $p = 0.0153$ ) was the main explanatory factor. On the other hand, temperature ranges showed  
397 little relation to the variation of plasticity  $H^2$  ( $R^2 = 0.012$ ,  $p = 0.667$ ). Taken together, overall  
398 body-size traits plasticity showed significant  $H^2$ , indicating a substantial effect of the genetic  
399 background on the variation of these traits in this population.

400 The previous results suggested that QTL affecting body-size traits can be located on  
401 different chromosomes when measured in different environment, indicating an environment-  
402 QTL interaction. To further understand the mechanism of trait plasticity, we mapped QTL for  
403 trait plasticity. Statistical power analysis indicated that we can detect 80% of QTL explaining  
404 60% of variation (Table S5). For all three conditions, we found five significant plasticity  
405 QTL. Two plasticity QTL were found in the temperature range from 16°C to 20°C harbouring  
406 a locus associated with width pharynx at adult stage, and length of the procorpus at adult  
407 stage. Two plasticity QTL in temperature range of 20°C to 24°C were associated with length  
408 isthmus at adult stage and body volume at L4 stage. One plasticity QTL in temperature ranges  
409 of 24°C to 26°C related to length isthmus at L4 stage (Figure 4B, 4C; Table S8). Hence, we  
410 found less QTL than for the individual temperatures. However, this was to be expected since  
411 the narrow-sense heritability of plasticity was lower and resulted in fewer significant values.

412 We compared the plasticity QTL to the QTL mapped for the individual temperatures.  
413 Of the five plasticity QTL, three of them were colocalized with QTL for body-size traits  
414 within individual temperatures (Figure 3A; 4B): (1) plasticity QTL of length procorpus in the  
415 temperature range from 16°C to 20°C colocalized with QTL for length width ratio of adult  
416 nematode at 16°C; (2) plasticity QTL for length isthmus of L4 worms in temperature ranges  
417 of 24°C to 26°C colocalized with length width ratio of adult worms in 24°C; (3) plasticity  
418 QTL for length isthmus of adult worms in the temperature range of 20°C to 24°C colocalized  
419 with QTL for length pharynx at adult stage at 16°C. These results indicate that although

420 plasticity can be reflected in individual temperatures, contrasting trait values over varying  
421 conditions reveals new insights into the underlying loci.

422 We continued by investigating the direction of the plasticity QTL. In two of the QTL  
423 the N2 genotype had a negative effect on the trait value, namely for length procorpus (16°C to  
424 20°C at adult stage) and plasticity QTL for length isthmus (20°C to 24°C at adult stage). In  
425 other words, the RILs harbouring N2 genotype at the peak marker location have decreased  
426 phenotype, while CB4856 genotype have an increased phenotype (Figure 4C). In contrast, for  
427 plasticity QTL of width pharynx (16°C to 20°C at adult stage), body volume (20°C to 24°C at  
428 L4 stage), and length isthmus (24°C to 26°C at L4 stage), the RILs with an N2 locus display  
429 an increase of the trait value. The slope of reaction norm of the trait plasticity indicates  
430 allele(s) that affect the trait variation both in environment 1 and environment 2 linked to  
431 genetic variation in plasticity (Lafuente & Beldade, 2019). Together, our results indicate that  
432 temperature-related phenotypic plasticity of body-size traits were not governed by alleles with  
433 large changes in effect-sizes over the temperature gradient as we map few QTL. The  
434 heritability analysis indicate that in general, temperature-related plasticity is regulated by  
435 complex genetic effects over the course of the gradient.

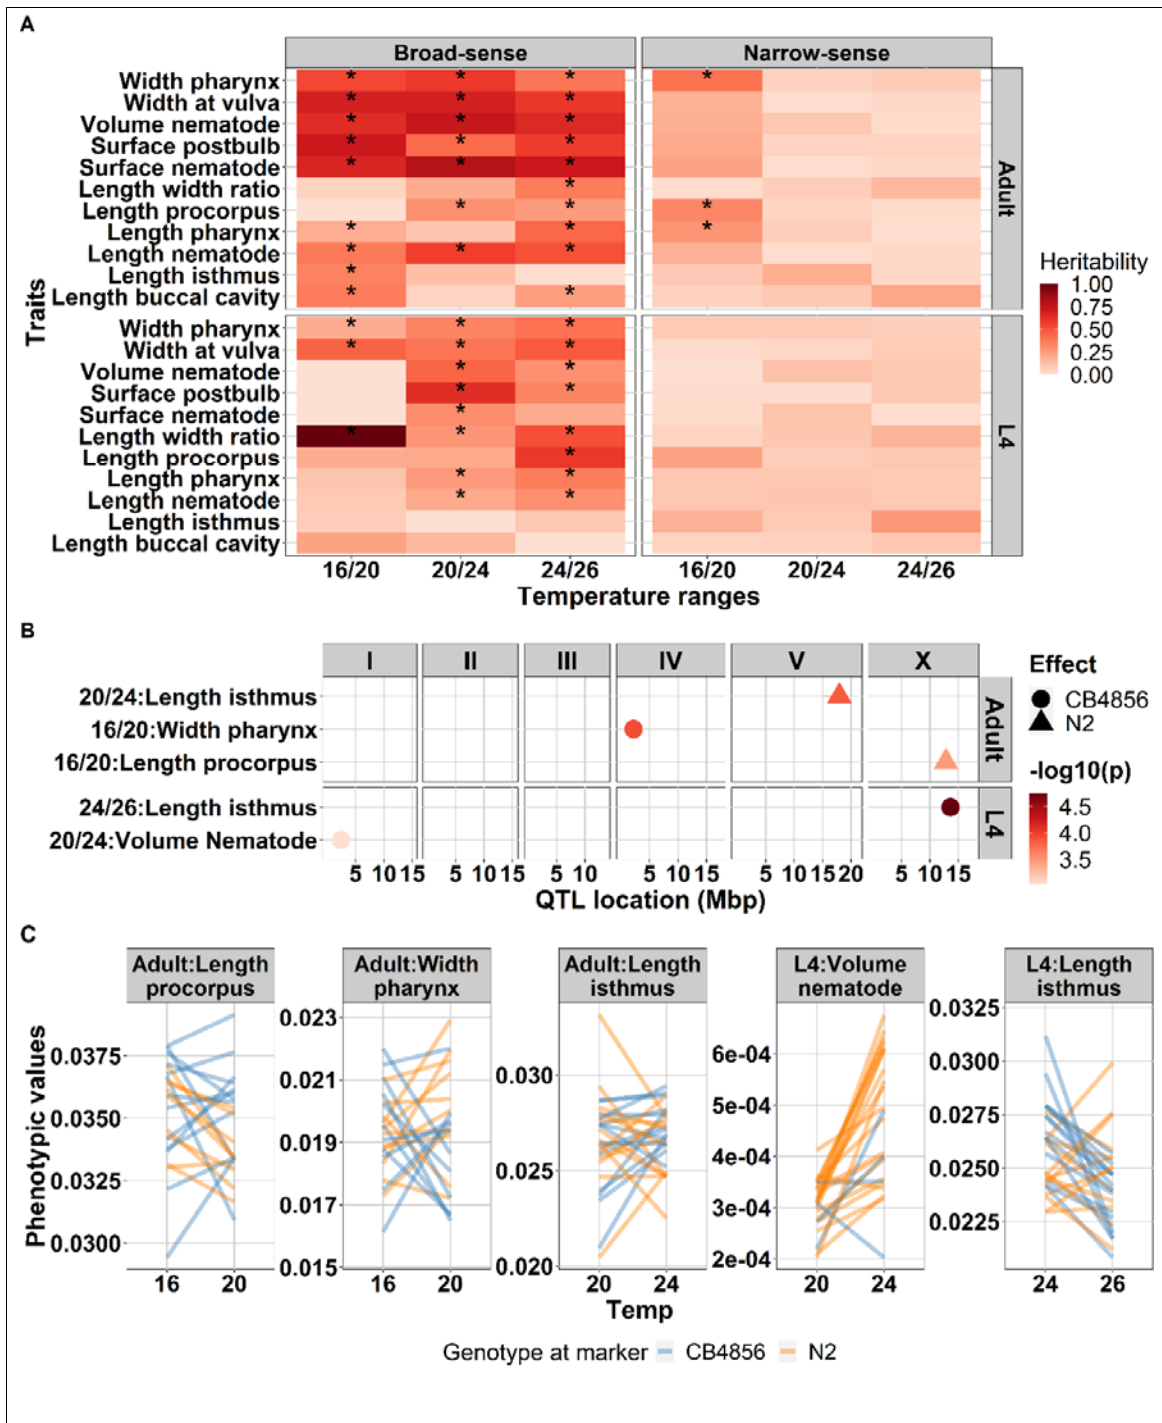

Figure 4. (A) **Broad-sense and narrow-sense heritability** of body-size traits plasticity across temperature range and developmental stages. On the x-axis temperature plasticity and y-axis are the traits measured. Colour gradient represent the heritability value as depicted on the legend on the right side of the plot. Asterisk (\*) inside the box represent significant heritability value (FDR0.05 based on 1000x permutation). Developmental stages are depicted on the right side of the plot whereas the type of heritability are on the top. (B) **Plasticity QTLs found for body-size traits in the 40 RILs**. The x-axis represents the position of the QTL in million base pairs (Mbp) for each chromosome and y-axis displays the corresponding significant plasticity QTL based on a single marker model. In total five plasticity QTL were found with  $-\log_{10}(p)$  score ranging from 3.03 to 4.75 ( $-\log_{10}(p)$  threshold 3.0). (C) **Phenotypic values (in mm) of the corresponding plasticity QTL**. X-axis represents the temperature regime where the plasticity QTL identified. Y-axis represents the mean phenotypic values of the traits. Orange lines were RILs with N2 genotype at the peak marker location, whereas blue lines represent RILs

with CB4856 genotype at the marker location. The traits are depicted on the top of each plots.

436

437 **Discussion**

438 **Body-size traits reaction norm reveals a genotype x environment interaction**

439 In most ectotherms, temperature is an important factor driving body size and is related  
440 to life history traits (Angilletta & Dunham, 2003; Ellers & Driessen, 2011; Ghosh et al., 2013;  
441 Peng et al., 2007). This was also found for *C. elegans* (Gutteling et al., 2007a,b; Kammenga et  
442 al., 2007). In this study, we used a *C. elegans* RIL population to study the underlying genetic  
443 regions that regulate the body-size traits, both main body traits (i.e length, width at vulva,  
444 volume, length/width ratio, and surface area) as well as internal organs and feeding apparatus  
445 (i.e length isthmus, length procorpus, length pharynx, width pharynx, and surface postbulb),  
446 and the plasticity of such traits in different temperatures at two developmental stages.

447 We observed that the reaction norm of the body-size traits over temperatures were  
448 varied depending on the trait and individual genotypes and showed a clear genotype-  
449 environment interaction (GxE) (Beldade et al., 2011; Lafuente & Beldade, 2019; Lafuente et  
450 al., 2018; Saltz et al., 2018). The fact that some RILs do not follow the temperature-size rule,  
451 especially for major body-size traits, might be the results of CB4856 genotype in the RILs, as  
452 this strain is known to deviate from this rule (Gutteling et al., 2007; Kammenga et al., 2007).  
453 Interestingly, we also found that the type of reaction norm was affected by developmental  
454 stage of the animal. For most of the traits measured, adult worms displayed non-parallel  
455 reaction norm across temperature, as opposed to L4 stage worms which showed relatively  
456 similar non-linear parallel reaction among genotypes in most of the traits (Figure S4). This  
457 indicates that variation in phenotypic plasticity was not common in juvenile animals  
458 suggesting the absence of (or less significant) GxE for most genotypes as described in (Saltz  
459 et al., 2018). This differences of L4 and adult stage reaction norm could stem from differences  
460 in interaction between gene-expressions and environment (temperature) in L4 and adult  
461 (Lafuente & Beldade, 2019; Li et al., 2006; Snoek et al., 2017; Viñuela et al., 2010).

462           Within *C. elegans* it was previously known that the reaction norm of body length and  
463 body volume was defied in the CB4856 strain due to a polymorphism in *tra-3* (Gutteling et  
464 al., 2007b; Kammenga et al., 2007). This was measured over a two-temperature gradient from  
465 12-24°C. We found that this not always the case, as the body size of CB4856 was dynamics  
466 (decrease and increase) over the course of temperatures. Meanwhile, for N2, we found that the  
467 negative linear norm was most apparent from 16 to 20, and at higher temperatures the overall  
468 body-size (e.g. length, width at vulva, surface area, and volume) were robust. It suggests that  
469 the body-size trait of N2 follows the “threshold” reaction norm model, instead of the linear  
470 function as described in (Lafuente & Beldade, 2019). This discrepancy could only be revealed  
471 by using four temperatures (16°C, 20°C, 24°C, and 26°C) as in this study.

472           Previous studies have suggested the effect of temperatures on genetic correlation of  
473 body size and several life history traits in different species. Lafuente *et al.*, (2018) found that  
474 body size (thorax and abdomen) of *D. melanogaster* reared at 17°C and 28°C significantly  
475 correlates with chill coma recovery and survival of *Metarhizium anisopliae* fungi. Norry &  
476 Loeschcke (2002) found a positive correlation effect of lifespan with temperature and sex in  
477 *D. melanogaster* at 25°C where the male flies lived longer. However, this effect was reversed  
478 at 14°C. In *C. elegans*, an 18% of increase lifespan due to heat-shock was reported for  
479 CB4856 but not for N2, whereas the RILs showed a wide range of lifespan variation  
480 (Rodriguez et al., 2012). Our results are in agreement of other previous studies (reviewed in  
481 Sgro & Hoffmann, 2004) that different environmental conditions result in a different  
482 correlation power, suggesting that evolutionary trajectories on trade-offs between traits,  
483 especially the traits that are controlled by specific loci, depend strongly on the environmental  
484 condition.

485

486 **Genetic parameters and QTL analysis indicate a complex genetic regulation of body-size**  
487 **traits**

488 In a population derived from two diverse parents, it is common to detect extreme  
489 phenotypes exceeding way beyond the parents (transgression) (Rieseberg et al., 1999).  
490 Transgression can represent genetic complexity of a trait, for example due to genetic  
491 interaction (epistasis) or it could mean that the trait is controlled by multiple loci with  
492 opposite effect combinations in the parental strains resulting in a similar phenotype.  
493 Transgression has been reported for *C. elegans* life-history traits such as egg size, number of  
494 eggs, body length (Andersen et al., 2015; Gutteling et al., 2007b; Kammenga et al., 2007),  
495 lifespan (Rodriguez et al., 2012), as well as metabolite levels (Gao et al., 2018), and gene  
496 expression (Li et al., 2006). We found transgressive segregation for almost all traits in  
497 temperature and developmental stage combinations, indicating a complementary actions of  
498 multiple loci underlying these traits.

499 We then calculated the broad-sense heritability to investigate the proportion of  
500 variance explained by genetic factors in our RIL population. It should be noted that because  
501 of the necessity of using batches  $H^2$  represents an upper-bound. Still, our estimation of broad-  
502 sense heritability of adult body length at 20°C (0.51) was similar ( $H^2 = 0.57$ ) as reported by  
503 Andersen et al., (2014). In addition, the  $H^2$  of body volume (0.71) and width at vulva (0.76) in  
504 this study are also similar to (Snoek et al., 2019), which were 0.77 and 0.75, respectively.  
505 Heritability is a population trait characteristic and highly depends on the type of population  
506 used and environment. Therefore, the fact that we found similar heritability with previous  
507 works indicate that the variation of these traits is quite stable between different mapping  
508 population. This could also mean that the relative effect of the micro-environment as well as  
509 the stochasticity is small. Furthermore, similar patterns of heritability that changed over  
510 temperatures (12°C and 24°C) were reported for body mass (volume), growth rate (change in

511 body length), age at maturity, egg size, and egg numbers (Gutteling et al., 2007a; Gutteling et  
512 al., 2007b).

513 By QTL mapping, we found 18 significant QTL for 88 temperature and developmental  
514 stage combinations regulating body-size traits. Here, we showed QTL of some the traits were  
515 colocalized in the same location in chromosome. For example, body length and surface area  
516 of the nematode in L4 stage at 20°C shared the same genomic region on the left arm of  
517 chromosome X. This is expected since these traits have strong positive correlation. All the  
518 colocalized traits showed the same QTL effect where N2-derived loci were associated with an  
519 increase in size. It is possible that such co-localized QTL were the result of a single  
520 pleiotropic modifier affecting various aspects of the *C. elegans* physiology. On the other  
521 hand, this might be the result of unresolved separate QTL (Dupuis & Siegmund, 1999;  
522 Gutteling et al., 2007b; Sterken et al., 2020).

523 As body length at 20°C has been investigated across multiple studies, we used it to  
524 cross-reference our mapping. The same location (chromosome X: 4.9 Mb) was mapped in two  
525 other studies (Andersen et al., 2014; Andersen et al., 2015). Furthermore, many QTL located  
526 in left arm of chromosome X were associated with body length, indicating the alleles  
527 controlling these traits might the same or linked with alleles of body length. In other study,  
528 using a multi-parent RIL, it was found that loci located in the same position (chromosome X  
529 around 4.5 to 5Mb) was associated with length/width ratio which is also related to body  
530 length (Snoek et al., 2019). For the same trait, (Snoek et al., 2014) found the QTL in different  
531 chromosome (i.e chr IV), meaning that our study has the power to reveal the previous  
532 undetected QTL.

533 Nagashima et al., (2017) summarized factors and its genetic basis involved in  
534 regulating body size in *C. elegans* including *DBL-1*, *TGF-β* signalling, *DAF-2*, *rict-1*, *sma-5*,  
535 *wts-1*, *IGF*-signalling, *tra-3*, *npr-1*, *cat-2*, *dop-3*, *eat-2*, *pha-2*, and *pha-3*. We manually



536 checked the position of those genes in [www.wormbase.org](http://www.wormbase.org) and found that none of the genes  
537 located under our QTL, except for *npr-1* (wormbase, 2021). Our QTL in chromosome X  
538 overlapped with the location of the Neuropeptide receptor 1 (*npr-1*) allele, which encodes the  
539 mammalian neuropeptide Y receptor homolog. This allele is a known pleiotropic regulator  
540 affecting traits such as lifetime fecundity, body size, and resistance to pathogens mediated by  
541 altered exposure to bacterial food (Andersen et al., 2014; Nakad et al., 2016; Reddy et al.,  
542 2009; Sterken et al., 2015). Moreover, 7 out of 8 QTL that colocalized in chromosome X has  
543 an increase size that are associated with N2 genotype, which support our hypothesis that those  
544 seven trait could be *npr-1* regulated.

545         Although not significant, we found potential QTL of body volume and width at vulva  
546 of adult nematode at 20°C and 24°C on the left arm of chromosome IV (Figure S7) which  
547 overlapped with QTL identified previously for body volume by (Gutteling et al., 2007b;  
548 Kammenga et al., 2007) at 24°C using a larger population of RILs, also in chromosome X at  
549 20°C using multi-parental RIL (Snoek et al., 2019). These results indicate that these QTL  
550 represent robust and predictable genetic associations with temperature and size.

551         From 18 significant QTL, 9/18 (50%) were transgressive and 15/18 (83%) of the QTL  
552 had moderate to high heritability (> 0.3). These findings indicate a highly complex genetic  
553 regulation of many body-size traits that could involve multiple interaction of different genetic  
554 variants. This was supported by the higher value of broad-sense heritability compared to  
555 narrow-sense heritability which suggests that the driving factors of most heritable traits were  
556 additive loci of opposing effects or genetic interactions.

557

558 **Mapping of plasticity increments indicates small effect-size changes resulting in shifting**  
559 **loci**

560 By mapping phenotypic plasticity over adjacent temperatures, we only found five  
561 plasticity QTL. We found two plasticity QTL over 16°C to 20°C that were related to width  
562 pharynx and length procorpus, both in adult stage. In addition, we detected two plasticity QTL  
563 over 20°C to 24°C that was related to length isthmus in adult stage and body volume at L4  
564 stage. Lastly, one plasticity QTL over 24°C to 26°C associated with length isthmus at L4  
565 stage. These result suggests that the QTL associated plasticity was environment specific,  
566 meaning that the candidate genes in the QTL region are differentially expressed depending on  
567 environmental conditions (Gutteling et al., 2007b).

568 We found little overlap between QTL for trait plasticity and QTL of traits in specific  
569 temperatures and developmental stages. Moreover, the plasticity QTL and traits QTL that  
570 colocalized were related to different traits. This low overlap of plasticity QTL and body-size  
571 trait QTL was also reported for *D. melanogaster* (Lafuente et al., 2018). Our results contribute  
572 to the long standing debate on the genetic basis of plasticity (whether it is controlled via  
573 specific loci for trait plasticity or via the same loci that regulate trait at certain environment)  
574 (Via et al., 1995). We showed that genetic basis of trait plasticity, to some extent, can be the  
575 same with the genetic basis of traits in certain environment, which support both ideas in  
576 congruence with previous papers, e.g. (Têtard-jones et al., 2011). We also showed that one  
577 loci can be responsible for different traits as well as responsible for plasticity in different  
578 environments. These findings may also indicate an allelic sensitivity model underlying  
579 plasticity mechanism where loci display environmental-based allelic sensitivity (Scheiner,  
580 1993). The fact that these plasticity QTL were colocalized with QTL of traits at certain  
581 environment may suggest that the QTL contains loci/alleles that are activated when the  
582 population in a different environment or in an unusual condition (Paaby & Rockman, 2014)  
583 and can points to the co-evolution of traits plasticity and traits at given environment.

584

585 **Acknowledgements**

586 The authors thank Simone Ariens for measurements on the microscopy images and Miriam  
587 Rodriguez for technical assistance. We thank Anne Morbach (Schlaugemacht.net) for making  
588 Figure 1A. We thank Harm Nijveen for assistance with WormQTL2. We thank Lisa van  
589 Sluijs for the critical review of the draft manuscript. We thank Fred van Eeuwijk for helpful  
590 discussions.

591

592 **Funding**

593 M.G.S. was supported by NWO domain Applied and Engineering Sciences VENI grant  
594 (17282)

595

596 **Availability of data and materials**

597 The strains used in this study can be requested from the authors. The underlying data is  
598 included in the paper and interactively accessible via WormQTL2.

599

600 **Author contributions**

601 MGS, LBS and JEK conceived and designed the experiments. MGS and JAGR conducted the  
602 experiments. MIM analyzed the data with input from MGS. MIM and MGS wrote the  
603 manuscript, with input from JEK and LBS. All authors commented on the manuscript.

604

605 **Supplementary material**

606 **Supplementary Table S1.** An overview of the experimental set up and raw data (in pixels) of  
607 this study. Per nematodes individual, detailed workflow of the experiment starting from the  
608 nematodes line used, replicate per lines, bleaching date and time per nematodes, picture date  
609 and time per nematodes, developmental stage and age of the nematodes when the pictures  
610 were taken, and raw data of the traits measured (in pixel) are given.

611

612 **Supplementary Table S2.** Calculated raw data (in mm) and the mean value of every traits  
613 measured. Conversion of the raw data was done by calculating the conversion constant from  
614 pixels to millimeters using ImageJ. Mean values of the trait were calculated per nematodes  
615 lines per temperature and developmental stages. All blank cells containing no value were  
616 removed.

617

618 **Supplementary Table S3.** Calculated transgressive segregation. Per Strain, stage,  
619 temperature, and trait the t-test significance - adjusted for multiple testing by the false  
620 discovery rate (FDR) method – is given. When both the N2 and CB4856 parent were  
621 significant, a strain was considered to show transgression.

622

623 **Supplementary Table S4.** Calculated broad sense and narrow sense heritability. Per trait,  
624 developmental stage and temperature the broad-sense heritability  $H^2$  was calculated  
625 ( $H2\_REML$ ), the value for the 0.05 FDR threshold is also given ( $H2\_FDR$ ) as is whether the  
626  $H^2$  was significant ( $H2\_significance$ ). Similar for the narrow-sense heritability  $h^2$  was  
627 calculated ( $h2\_REML$ ), the value for the 0.05 FDR threshold is also given ( $h2\_FDR$ ) as is  
628 whether the  $h^2$  was significant ( $h2\_significance$ ).

629

630 **Supplementary Table S5.** Analysis of power by simulation of QTL. Ten simulated QTL per  
631 marker location was performed that explained 20-80% of the variation, with an increment of  
632 5% (20%, 25%, 30%, ..., 80%). The threshold used was  $-\log_{10}(p)$  3.4 that was derived from  
633 1000x permutation at an FDR 0.05. The number of variance explained, fraction of false QTL,  
634 detected QTL, undetected QTL, as well as QTL effect size estimation were given.

635

636 **Supplementary Table S6.** QTL table of the body-size traits across different temperatures and  
637 developmental stages. Per trait in temperature and developmental stage combination, the QTL  
638 detection was done by calculating the  $-\log_{10}(p)$  score and significance was determined if the  
639 QTL  $-\log_{10}(p)$  value is bigger than the FDR (0.05) at  $-\log_{10}(p)$  of 3.4 based on permutation  
640 analysis. Per QTL in developmental stage and temperature combination, the position of QTL  
641 in chromosome, QTL position in base pairs, QTL left region, QTL right region, QTL effect,  
642 and the  $R^2$  value of each QTL are given.

643

644 **Supplementary Table S7.** Calculated broad sense and narrow sense heritability of plasticity.  
645 Plasticity per trait, developmental stage and temperature ranges the broad-sense heritability

646  $H^2$  was calculated (H2\_REML), the value for the 0.05 FDR threshold is also given (H2\_FDR)  
647 as is whether the  $H^2$  was significant (H2\_significance). Similar for the narrow-sense  
648 heritability  $h^2$  was calculated (h2\_REML), the value for the 0.05 FDR threshold is also given  
649 (h2\_FDR) as is whether the  $h^2$  was significant (h2\_significance).

650

651 **Supplementary Table 8.** Plasticity QTL table of the body-size traits across different  
652 temperatures changes and developmental stages. Per trait and developmental stage, the  
653 temperature change, the position of QTL in chromosome, QTL position in base pairs, QTL  
654 left region, QTL right region, QTL effect, and the  $R^2$  value of each QTL are given. The QTL  
655 detection was done by calculating the  $-\log_{10}(p)$  score and significance was determined if the  
656 QTL  $-\log_{10}(p)$  value is bigger than the FDR (0.05) at  $-\log_{10}(p)$  of 3.4 or 4.1 (for temperature  
657 range 24°C to 26°C).

658

659 **Supplementary Figure S1.** (A) Genetic map of the 40 RILs population. The x-axis indicates  
660 the genomic position with separate chromosomes indicated at the top of the graph. The strains  
661 of the RILs are depicted on y-axis. The RILs were genotyped by PCR-based genotyping.  
662 Orange color represents N2 genotype while CB4856 is represented by blue. Regions with  
663 uncertain genotyped are indicated by white. (B) Genotype distribution of the 729 markers  
664 along the six chromosomes. Orange represent N2 background while CB4856 was depicted in  
665 blue. The proportion of alleles frequencies that formed the RILs genetic background were  
666 roughly equal over most of the genome (Figure S2). On the left arm of chromosome I  
667 however, there was a skew of allele frequencies which we have been expected as we used the  
668 same RILs panel developed by (Li *et al.*, 2006). This skew is the result of the genetic  
669 incompatibility between *zeel-1* and *peel-1* allele from N2 parent. The strains that are not  
670 protected by N2-provided *zeel-1* gene would be killed by the toxic effect from the N2-  
671 provided *peel-1* gene (Seidel *et al.*, 2011).

672

673 **Supplementary Figure S2.** Correlation plot between markers. The markers were arranged to  
674 conform their physical position starting from telomere until the arms of chromosome. The  
675 correlation ranges from -1 (purple) to 1 (green) where strong correlation indicated a linkage  
676 between markers. The genotyping was done using 729 SNPs marker generated previously  
677 from low coverage sequencing of the parental strains (N2 and CB4856) (Thompson *et al.*,  
678 2015). To validate the genetic map for QTL mapping, we conducted a correlation analysis of  
679 the markers to detect linkage over the map. The markers are arranged to represent their  
680 physical position in chromosome.

681

682 **Supplementary Figure S3.** The reaction norms of *C. elegans* body-size traits plasticity  
683 across different temperature and developmental stages. The x-axis represents temperatures  
684 used while y-axis represent the mean value of the individual strains in their respective traits  
685 (in mm, except for body volume in mm<sup>3</sup> and surface area in mm<sup>2</sup>). Please note that the y-axis

686 is not identical between traits. Both parents are depicted in blue (CB4856) and orange (N2),  
687 while the RILs are grey. Lines are the traits mean value (N = 3 for RILs, and N= 9 to 12 for  
688 parents).

689

690 **Supplementary Figure S4.** Correlation analysis of body-size traits in the RIL population. (A)  
691 correlation heatmap of body-size traits of all RILs in L4 stage. There were three five strong  
692 positively correlated clusters which were temperature specific. (B) correlation heatmap of  
693 body-size traits of all RILs in adult stage. There were five strong cluster of positive  
694 correlation of worm grown in 20°C and 24°C.

695

696 **Supplementary Figure S5.** Principal component analysis of *C. elegans* body-size at (A) L4  
697 stage and (B) adult stage: the first principal component (PC1) versus the second principal  
698 component (PC2) of the body-size traits from four different temperatures (16°C, 20°C, 24°C,  
699 and 26°C) and genetic backgrounds (N2, CB4856, and RILs).

700

701 **Supplementary Figure S6.** The body size parameters of *C. elegans* across 40 RILs and two  
702 parental strains. The average traits are expressed as percentage of sum of each traits (x-axis),  
703 followed by the mean value of the traits (y-axis). Please note that the y-axis is not identical  
704 between traits. The 40 RILs are indicated with grey, the parental N2 in orange, and the  
705 parental CB4856 in blue. Points are the traits mean value (N = 3 for RILs, and N= 9 to 12 for  
706 parents).

707

708 **Supplementary Figure S7.** Description of genotype at the peak marker locations of the  
709 significant QTL. X-axis represents parental genotype at the peak marker location of the QTL  
710 while y-axis represents the corresponding body-size traits. Blue box visualizes CB4856 and  
711 orange box is N2.  $R^2$  shows how much the variation of the body-size traits can be explained  
712 by genetic variation in the chromosome.

713

714 **Supplementary Figure S8.** QTL plot of the body-size traits. The QTL analysis were  
715 performed across four temperatures (16°C, 20°C, 24°C, 26°C) and two developmental stages  
716 (L4 and adult). X-axis displays genomic position in the chromosome corresponding to the box  
717 above the line while y-axis represents the LOD score. Box in the right graph show the  
718 developmental stages. Red line represents QTL at 16°C, green line at 20°C, blue line at 24°C,  
719 and purple line at 26°C. Red-dash line represents LOD threshold (1000x permutation-based  
720 significant LOD with FDR = 0.05).

721

722 **References**

- 723 Andersen, E. C., Bloom, J. S., Gerke, J. P., & Kruglyak, L. (2014). A Variant in the  
724 Neuropeptide Receptor npr-1 is a Major Determinant of *Caenorhabditis elegans* Growth  
725 and Physiology. *PLoS Genetics*, *10*(2). <https://doi.org/10.1371/journal.pgen.1004156>
- 726 Andersen, E. C., Shimko, T. C., Crissman, J. R., Ghosh, R., Bloom, J. S., Seidel, H. S., ...  
727 Kruglyak, L. (2015). A Powerful New Quantitative Genetics Platform, Combining  
728 *Caenorhabditis elegans* High-Throughput Fitness Assays with a Large Collection of  
729 Recombinant Strains. *G3*, *5*(5), 911–920. <https://doi.org/10.1534/g3.115.017178>
- 730 Angilletta, M. J., & Dunham, A. E. (2003). The Temperature-Size Rule in Ectotherms □:  
731 Simple Evolutionary Explanations May Not Be General. *The American Naturalist*,  
732 *162*(3).
- 733 Atkinson, D. (1994). Temperature and organism size-A biological law for ectotherms □?  
734 *Advances in Ecological Research*, *25*(January).
- 735 Azevedo, R. B. R., French, V., & Partridge, L. (2002). Temperature modulates epidermal cell  
736 size in *Drosophila melanogaster*. *Journal of Insect Physiology*, *48*, 231–237.
- 737 Azevedo, R. B. R., James, A. C., McCabe, J., & Partridge, L. (1998). Latitudinal Variation of  
738 Wing:Thorax size and Wing-Aspect Ration in *Drosophila melanogaster*. *Evolution*,  
739 *52*(5), 1353–1362.
- 740 Bates, D., Mächler, M., Bolker, B. M., & Walker, S. C. (2015). Fitting linear mixed-effects  
741 models using lme4. *Journal of Statistical Software*, *67*(1).  
742 <https://doi.org/10.18637/jss.v067.i01>
- 743 Beldade, P., Mateus, A. R. A., & Keller, R. A. (2011). Evolution and molecular mechanisms  
744 of adaptive developmental plasticity. *Molecular Ecology*, *20*, 1347–1363.  
745 <https://doi.org/10.1111/j.1365-294X.2011.05016.x>
- 746 Bochdanovits, Z., Van Der Klis, H., & De Jong, G. (2003). Covariation of Larval Gene  
747 Expression and Adult Body Size in Natural Populations of *Drosophila melanogaster*.  
748 *Molecular Biology and Evolution*, *20*(11), 1760–1766.  
749 <https://doi.org/10.1093/molbev/msg179>
- 750 Brenner, S. (1974). Genetics of the *Caenorhabditis elegans*. *ChemBioChem*, *4*(8), 683–687.  
751 <https://doi.org/10.1002/cbic.200300625>
- 752 Callahan, H. S., Dhanooolal, N., & Ungerer, M. C. (2005). Plasticity genes and plasticity costs:  
753 A new approach using an *Arabidopsis* recombinant inbred population. *New Phytologist*,  
754 *166*(1), 129–140. <https://doi.org/10.1111/j.1469-8137.2005.01368.x>
- 755 Carta, D., Villanova, L., Costacurta, S., Patelli, A., Poli, I., Vezzù, S., ... Falcaro, P. (2011).  
756 Method for optimizing coating properties based on an evolutionary algorithm approach.  
757 *Analytical Chemistry*, *83*(16), 6373–6380. <https://doi.org/10.1021/ac201337e>
- 758 Czarnoleski, M., Kramarz, P., Malek, D., & Drobniak, S. M. (2017). Genetic components in a  
759 thermal developmental plasticity of the beetle *Tribolium castaneum*. *Journal of Thermal*  
760 *Biology*, *68*(February), 55–62. <https://doi.org/10.1016/j.jtherbio.2017.01.015>
- 761 Dupuis, J., & Siegmund, D. (1999). Statistical methods for mapping quantitative trait loci

- 762 from a dense set of markers. *Genetics*, *151*(1), 373–386.
- 763 Ellers, J., & Driessen, G. (2011). Genetic correlation between temperature-induced plasticity  
764 of life-history traits in a soil arthropod. *Evolutionary Ecology*, *25*, 473–484.  
765 <https://doi.org/10.1007/s10682-010-9414-1>
- 766 Fischer, K., Bauerfeind, S. S., & Fiedler, K. (2006). Temperature-mediated plasticity in egg  
767 and body size in egg size-selected lines of a butterfly. *Journal of Thermal Biology*, *31*,  
768 347–354. <https://doi.org/10.1016/j.jtherbio.2006.01.006>
- 769 Gaertner, B. E., & Phillips, P. C. (2010). *Caenorhabditis elegans* as a platform for molecular  
770 quantitative genetics and the systems biology of natural variation. *Genetics Research*,  
771 *92*(5–6), 331–348. <https://doi.org/10.1017/S0016672310000601>
- 772 Gao, A. W., Sterken, M. G., de Bos, J. uit, van Creijl, J., Kamble, R., Snoek, B. L., ...  
773 Houtkooper, R. H. (2018). Natural genetic variation in *C. Elegans* identified genomic  
774 loci controlling metabolite levels. *Genome Research*, *28*(9), 1296–1308.  
775 <https://doi.org/10.1101/gr.232322.117>
- 776 Ghosh, S. M., Testa, N. D., & Shingleton, A. W. (2013). Temperature-size rule is mediated by  
777 thermal plasticity of critical size in *Drosophila melanogaster*. *Proceedings of the Royal*  
778 *Society B: Biological Sciences*, *280*(1760). <https://doi.org/10.1098/rspb.2013.0174>
- 779 Gutteling, E. W., Doroszuk, A., Riksen, J. A. G., Prokop, Z., Reszka, J., & Kammenga, J. E.  
780 (2007). Environmental influence on the genetic correlations between life-history traits in  
781 *Caenorhabditis elegans*. *Heredity*, *98*, 206–213. <https://doi.org/10.1038/sj.hdy.6800929>
- 782 Gutteling, E. W., Riksen, J. A. G., Bakker, J., & Kammenga, J. E. (2007). Mapping  
783 phenotypic plasticity and genotype – environment interactions affecting life-history traits  
784 in *Caenorhabditis elegans*. *Heredity*, *98*, 28–37. <https://doi.org/10.1038/sj.hdy.6800894>
- 785 Jovic, K., Sterken, M. G., Grilli, J., Bevers, R. P. J., Rodriguez, M., Riksen, J. A. G., ...  
786 Snoek, L. B. (2017). Temporal dynamics of gene expression in heat-stressed  
787 *Caenorhabditis elegans*. *PLoS ONE*, 1–16.
- 788 Kammenga, J. E., Doroszuk, A., Riksen, J. A. G., Hazendonk, E., Spiridon, L., Petrescu, A.  
789 J., ... Bakker, J. (2007). A *Caenorhabditis elegans* wild type defies the temperature-size  
790 rule owing to a single nucleotide polymorphism in *tra-3*. *PLoS Genetics*, *3*(3), 0358–  
791 0366. <https://doi.org/10.1371/journal.pgen.0030034>
- 792 Kang, M. H., Zaitlen, N. A., Wade, C. M., Kirby, A., Heckerman, D., Daly, M. J., & Eskin, E.  
793 (2008). Efficient control of population structure in model organism association mapping.  
794 *Genetics*, *178*(3), 1709–1723. <https://doi.org/10.1534/genetics.107.080101>
- 795 Klok, C. J., & Harrison, J. F. (2013). The Temperature Size Rule in Arthropods □ :  
796 Independent of Macro-Environmental Variables but Size Dependent. *Integrative and*  
797 *Comparative Biology*, *53*(4), 557–570. <https://doi.org/10.1093/icb/ict075>
- 798 Kruijer, W., Boer, M. P., Malosetti, M., Flood, P. J., Engel, B., Kooke, R., ... Van Eeuwijk,  
799 F. A. (2014). Marker-based estimation of heritability in immortal populations. *Genetics*,  
800 *199*(2), 379–398. <https://doi.org/10.1534/genetics.114.167916>
- 801 Lafuente, E., & Beldade, P. (2019). Genomics of developmental plasticity in animals.  
802 *Frontiers in Genetics*, *10*(JUL), 1–18. <https://doi.org/10.3389/fgene.2019.00720>



- 803 Lafuente, E., Duneau, D., & Beldade, P. (2018). Genetic basis of thermal plasticity variation  
804 in *Drosophila melanogaster* body size. *PLoS Genetics*, *14*(9), 1–24.  
805 <https://doi.org/10.1371/journal.pgen.1007686>
- 806 Li, Y., Álvarez, O. A., Gutteling, E. W., Tijsterman, M., Fu, J., Riksen, J. A. G., ...  
807 Kammenga, J. E. (2006). Mapping determinants of gene expression plasticity by  
808 genetical genomics in *C. elegans*. *PLoS Genetics*, *2*(12), 2155–2161.  
809 <https://doi.org/10.1371/journal.pgen.0020222>
- 810 Nagashima, T., Ishiura, S., & Suo, S. (2017). Regulation of body size in *Caenorhabditis*  
811 *elegans*: Effects of environmental factors and the nervous system. *International Journal*  
812 *of Developmental Biology*, *61*(6–7), 367–374. <https://doi.org/10.1387/ijdb.160352ss>
- 813 Nakad, R., Snoek, L. B., Yang, W., Ellendt, S., Schneider, F., Mohr, T. G., ... Schulenburg,  
814 H. (2016). Contrasting invertebrate immune defense behaviors caused by a single gene,  
815 the *Caenorhabditis elegans* neuropeptide receptor gene *npr-1*. *BMC Genomics*, *17*(1), 1–  
816 20. <https://doi.org/10.1186/s12864-016-2603-8>
- 817 Norry, F. M., & Loeschcke, V. R. (2002). Longevity and resistance to cold stress in cold-  
818 stress selected lines and their controls in *Drosophila melanogaster*. *Journal of*  
819 *Evolutionary Biology*, *15*, 775–783.
- 820 Paaby, A. B., & Rockman, M. V. (2014). Cryptic genetic variation □: evolution ' s hidden  
821 substrate. *Nature Reviews Genetics*, *15*(4), 247–258. <https://doi.org/10.1038/nrg3688>
- 822 Peng, I. F., Berke, B. A., Zhu, Y., Lee, W. H., Chen, W., & Wu, C. F. (2007). Temperature-  
823 dependent developmental plasticity of *Drosophila* neurons: Cell-autonomous roles of  
824 membrane excitability, Ca<sup>2+</sup> influx, and cAMP signaling. *Journal of Neuroscience*,  
825 *27*(46), 12611–12622. <https://doi.org/10.1523/JNEUROSCI.2179-07.2007>
- 826 Petersen, C., Dirksen, P., & Schulenburg, H. (2015). Why we need more ecology for genetic  
827 models such as *C. elegans*. *Trends in Genetics*, *31*(3), 120–127.  
828 <https://doi.org/10.1016/j.tig.2014.12.001>
- 829 Reddy, K. C., Andersen, E. C., Kruglyak, L., & Kim, D. H. (2009). A polymorphism in *npr-1*  
830 is a behavioral determinant of pathogen susceptibility in *C. elegans*. *Science*, *323*(5912),  
831 382–384. <https://doi.org/10.1126/science.1166527>
- 832 Rieseberg, L. H., Archer, M. A., & Wayne, R. K. (1999). Transgressive segregation ,  
833 adaptation and speciation. *Heredity*, *83*(June).
- 834 Rockman, M. V., Skrovanek, S. M., & Kruglyak, L. (2010). Selection at Linked Sites Shapes.  
835 *Science*, (October), 372–376. <https://doi.org/10.1126/science.1194208>
- 836 Rodriguez, M., Snoek, L. B., Riksen, J. A. G., Bevers, R. P., & Kammenga, J. E. (2012).  
837 Genetic variation for stress-response hormesis in *C. elegans* lifespan. *Experimental*  
838 *Gerontology*, *47*(8), 581–587. <https://doi.org/10.1016/j.exger.2012.05.005>
- 839 Saltz, J. B., Bell, A. M., Flint, J., Gomulkiewicz, R., Hughes, K. A., & Keagy, J. (2018). Why  
840 does the magnitude of genotype-by-environment interaction vary? *Ecology and*  
841 *Evolution*, *8*(12), 6342–6353. <https://doi.org/10.1002/ece3.4128>
- 842 Scheiner, S. (1993). Plasticity as a Selectable Trait □: Reply to Via. *American Society of*  
843 *Naturalist*, *142*(2), 371–373.

- 844 Seidel, H. S., Ailion, M., Li, J., van Oudenaarden, A., Rockman, M. V., & Kruglyak, L.  
845 (2011). A novel sperm-delivered toxin causes late-stage embryo lethality and  
846 transmission ratio distortion in *C. elegans*. *PLoS Biology*, *9*(7).  
847 <https://doi.org/10.1371/journal.pbio.1001115>  
848
- 849 Sgro, C., & Hoffmann, A. (2004). Genetic correlations , tradeoffs and environmental  
850 variation. *Heredity*, 241–248. <https://doi.org/10.1038/sj.hdy.6800532>
- 851 Snoek, B. L., Sterken, M. G., Bevers, R. P. J., Volkers, R. J. M., Hof, A. Van, Brenchley, R.,  
852 ... Kammenga, J. E. (2017). Contribution of trans regulatory eQTL to cryptic genetic  
853 variation in *C. elegans*, 1–15. <https://doi.org/10.1186/s12864-017-3899-8>
- 854 Snoek, B. L., Volkers, R. J. M., Nijveen, H., Petersen, C., Dirksen, P., Sterken, M. G., ...  
855 Kammenga, J. E. (2019). A multi-parent recombinant inbred line population of *C.*  
856 *elegans* allows identification of novel QTLs for complex life history traits. *BMC Biology*,  
857 1–17.
- 858 Snoek, L. B., Orbidans, H. E., Stastna, J. J., Aartse, A., Rodriguez, M., Riksen, J. A. G., ...  
859 Harvey, S. C. (2014). Widespread genomic incompatibilities in *Caenorhabditis elegans*.  
860 *G3: Genes, Genomes, Genetics*, *4*(10), 1813–1823.  
861 <https://doi.org/10.1534/g3.114.013151>
- 862 Snoek, L. B., Sterken, M. G., Hartanto, M., van Zuilichem, A. J., Kammenga, J. E., de Ridder,  
863 D., & Nijveen, H. (2020). WormQTL2: an interactive platform for systems genetics in  
864 *Caenorhabditis elegans*. *Database*: *The Journal of Biological Databases and Curation*,  
865 2020, 1–17. <https://doi.org/10.1093/database/baz149>
- 866 Steigenga, M. J., Zwaan, B. J., Brakefield, P. M., & Fischer, K. (2005). The evolutionary  
867 genetics of egg size plasticity in a butterfly. *Journal of Evolutionary Biology*, *18*, 281–  
868 289. <https://doi.org/10.1111/j.1420-9101.2004.00855.x>
- 869 Sterken, M. G., Bevers, R. P. J., Volkers, R. J. M., Riksen, J. A. G., Kammenga, J. E., &  
870 Snoek, B. L. (2020). Dissecting the eQTL Micro-Architecture in *Caenorhabditis elegans*.  
871 *Frontiers in Genetics*, *11*(November), 1–15. <https://doi.org/10.3389/fgene.2020.501376>
- 872 Sterken, M. G., Plaat, L. V. B. Van Der, Riksen, J. A. G., Rodriguez, M., Schmid, T., Hajnal,  
873 A., ... Snoek, B. L. (2017). Ras / MAPK Modifier Loci Revealed by eQTL in  
874 *Caenorhabditis elegans*, *7*(September), 3185–3193. <https://doi.org/10.1534/g3.117.1120>
- 875 Sterken, M. G., Snoek, L. B., Kammenga, J. E., & Andersen, E. C. (2015). The laboratory  
876 domestication of *Caenorhabditis elegans*. *Trends in Genetics*, *31*(5), 224–231.  
877 <https://doi.org/10.1016/j.tig.2015.02.009>
- 878 Têtard-jones, C., Kertesz, M. ., & Preziosi, R. . (2011). Quantitative trait loci mapping of  
879 phenotypic plasticity and genotype-environment interactions in plant and insect  
880 performance. *Philosophical Transactions of the Royal Society B: Biological Sciences*,  
881 *366*(1569).
- 882 Thompson, O. A., Snoek, L. B., Nijveen, H., Sterken, M. G., Volkers, R. J. M., Brenchley, R.,  
883 ... Waterston, R. H. (2015). Remarkably divergent regions punctuate the genome  
884 assembly of the *Caenorhabditis elegans* hawaiian strain CB4856. *Genetics*, *200*(3), 975–

- 885            989. <https://doi.org/10.1534/genetics.115.175950>
- 886    Van Voorhies, W. A. (1996). Bergmann size clines: A simple explanation for their occurrence  
887            in ectotherms. *Evolution*, 50(3), 1259–1264. [https://doi.org/10.1111/j.1558-](https://doi.org/10.1111/j.1558-5646.1996.tb02366.x)  
888            5646.1996.tb02366.x
- 889    Via, S., Gomulkiewicz, R., Jong, G. De, Scheiner, S. M., Schlichting, C. D., & Tienderen, P.  
890            H. Van. (1995). Adaptive phenotypic plasticity □: consensus and controversy. *Trends in*  
891            *Ecology and Evolution*, 10(5).
- 892    Viñuela, A., Snoek, L. B., Riksen, J. A. G., & Kammenga, J. E. (2010). Genome-wide gene  
893            expression regulation as a function of genotype and age in *C. elegans*. *Genome Research*,  
894            20(7), 929–937. <https://doi.org/10.1101/gr.102160.109>
- 895    Viñuela, A., Snoek, L. B., Riksen, J. A. G., & Kammenga, J. E. (2011). Gene Expression  
896            Modifications by Temperature- Toxicants Interactions in *Caenorhabditis elegans*. *PLoS*  
897            *ONE*, 6(9). <https://doi.org/10.1371/journal.pone.0024676>
- 898    Wickham, H. (2011). Ggplot2. *Wiley Interdisciplinary Reviews: Computational Statistics*,  
899            3(2), 180–185. <https://doi.org/10.1002/wics.147>
- 900    Wickham, H., Averick, M., Bryan, J., Chang, W., McGowan, L., François, R., ... Yutani, H.  
901            (2019). Welcome to the Tidyverse. *Journal of Open Source Software*, 4(43), 1686.  
902            <https://doi.org/10.21105/joss.01686>
- 903
- 904

**A**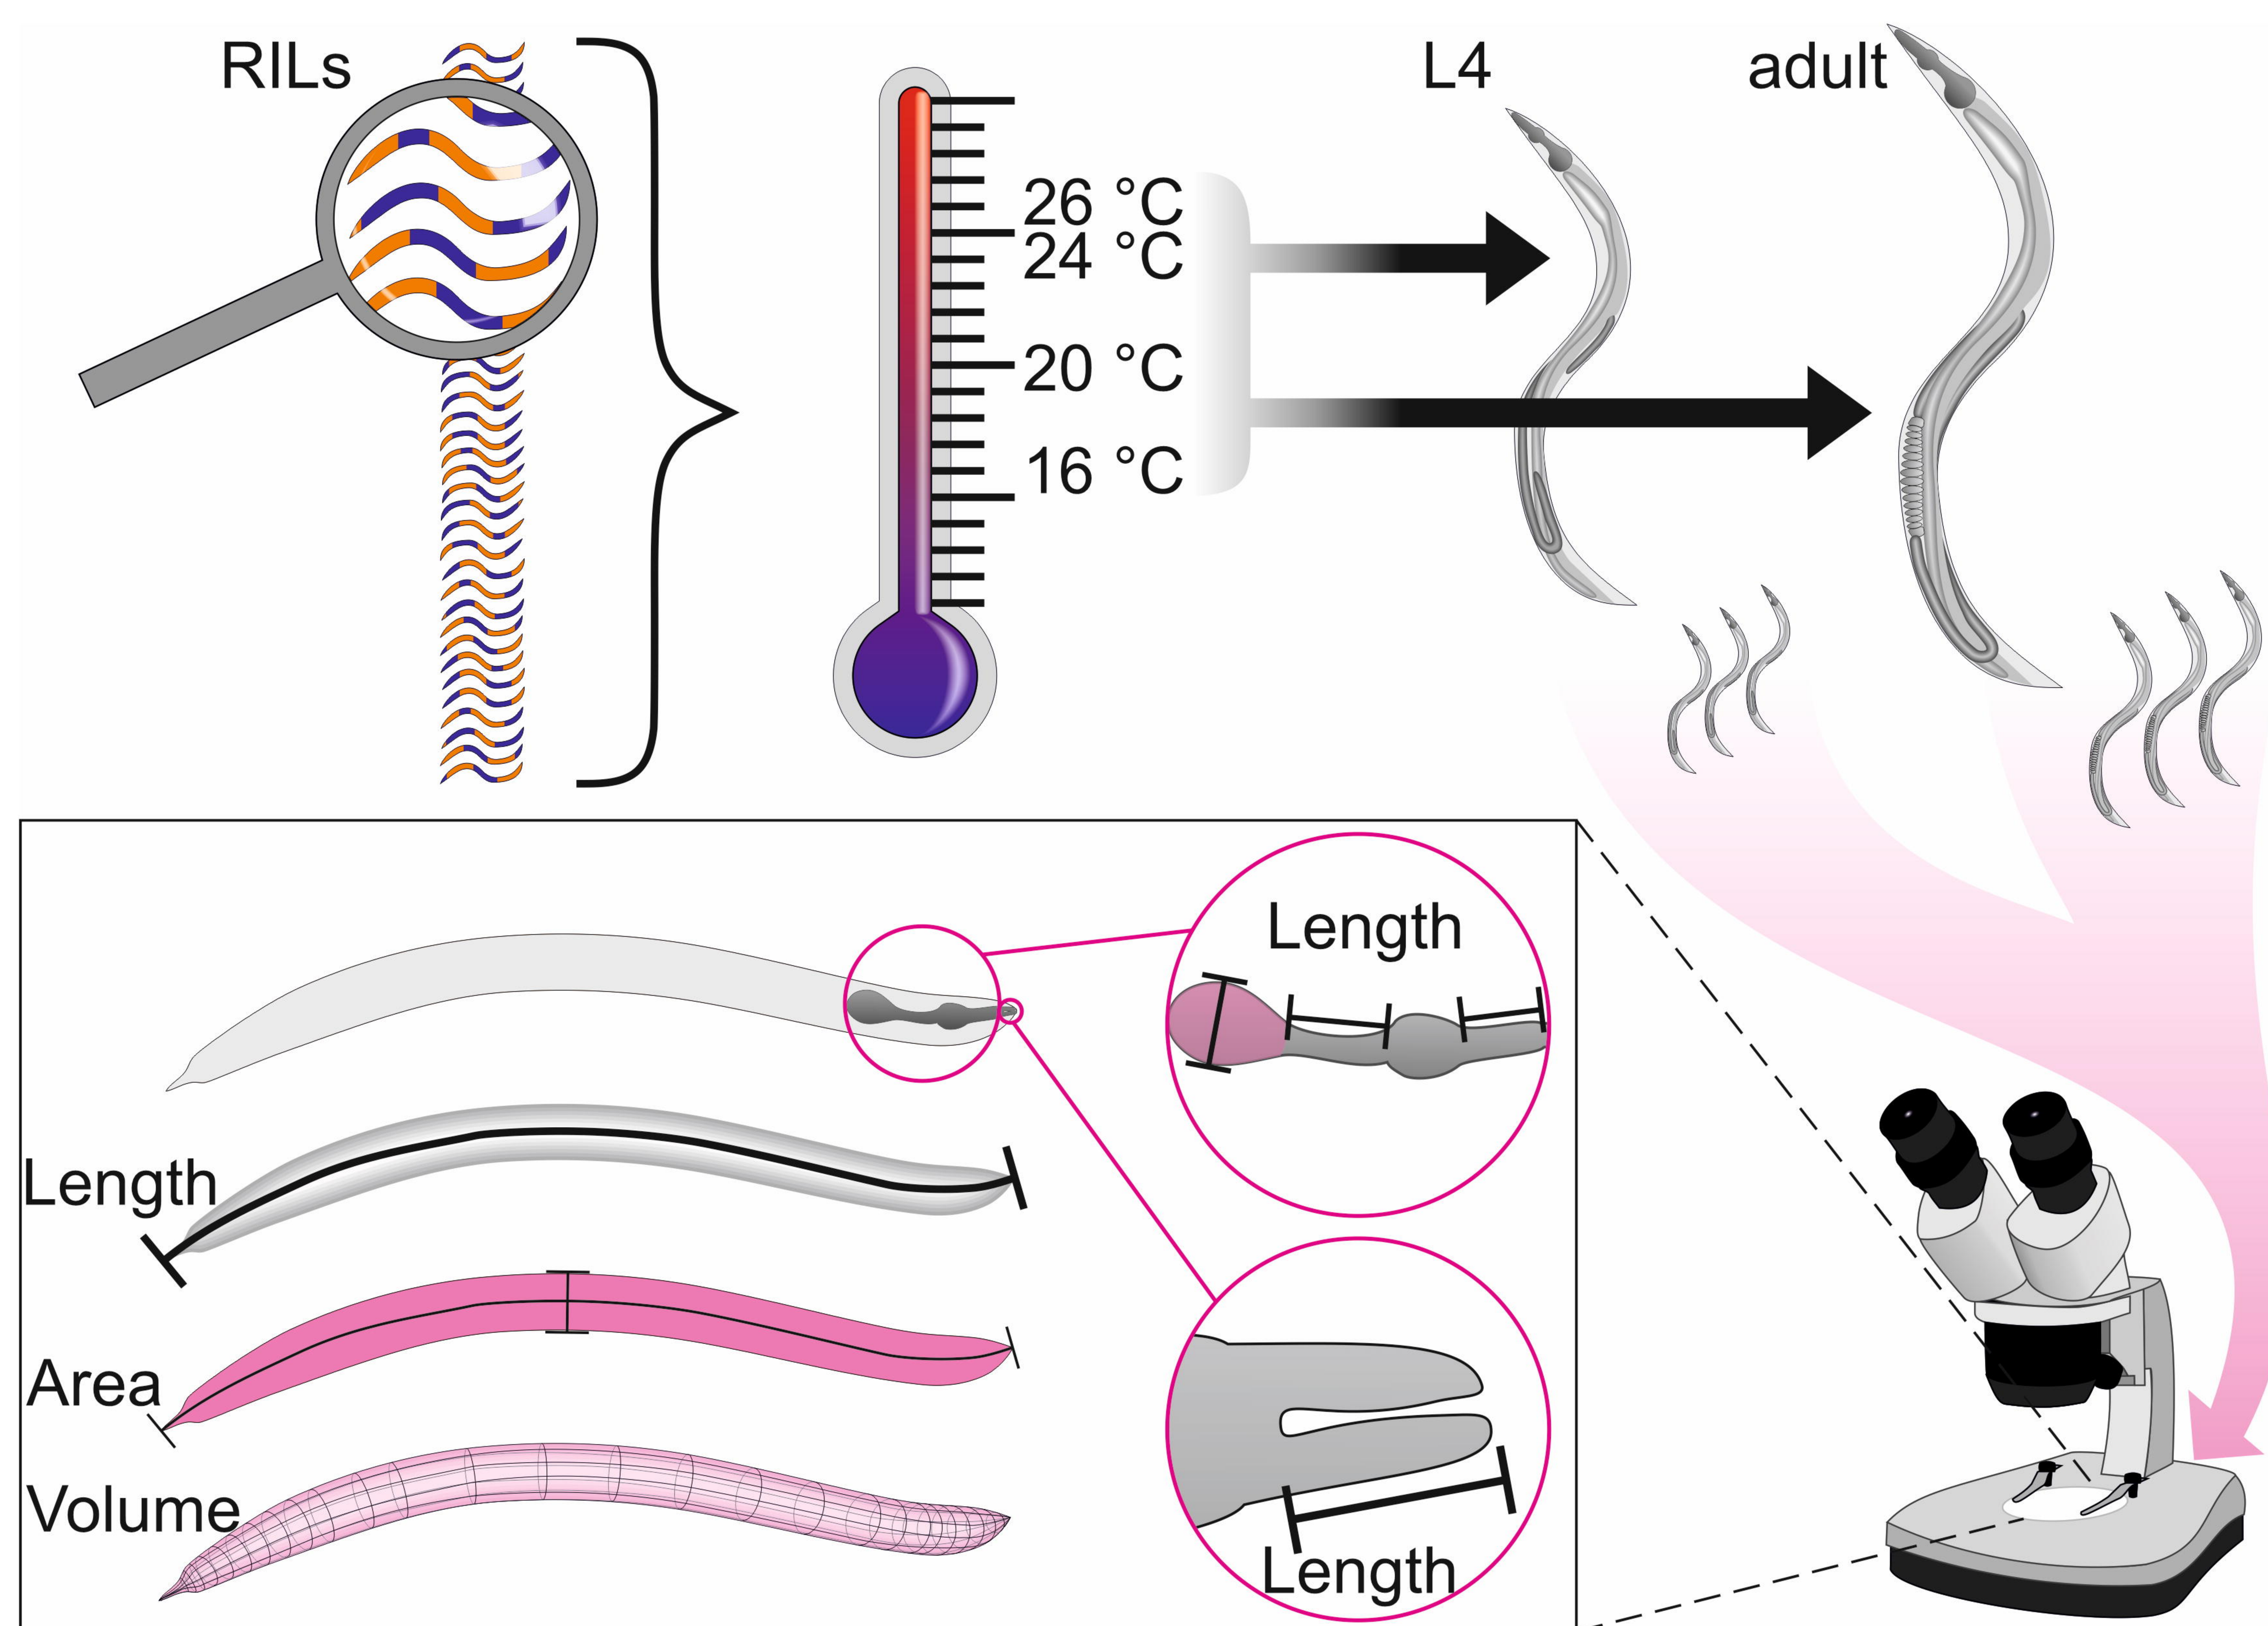**B**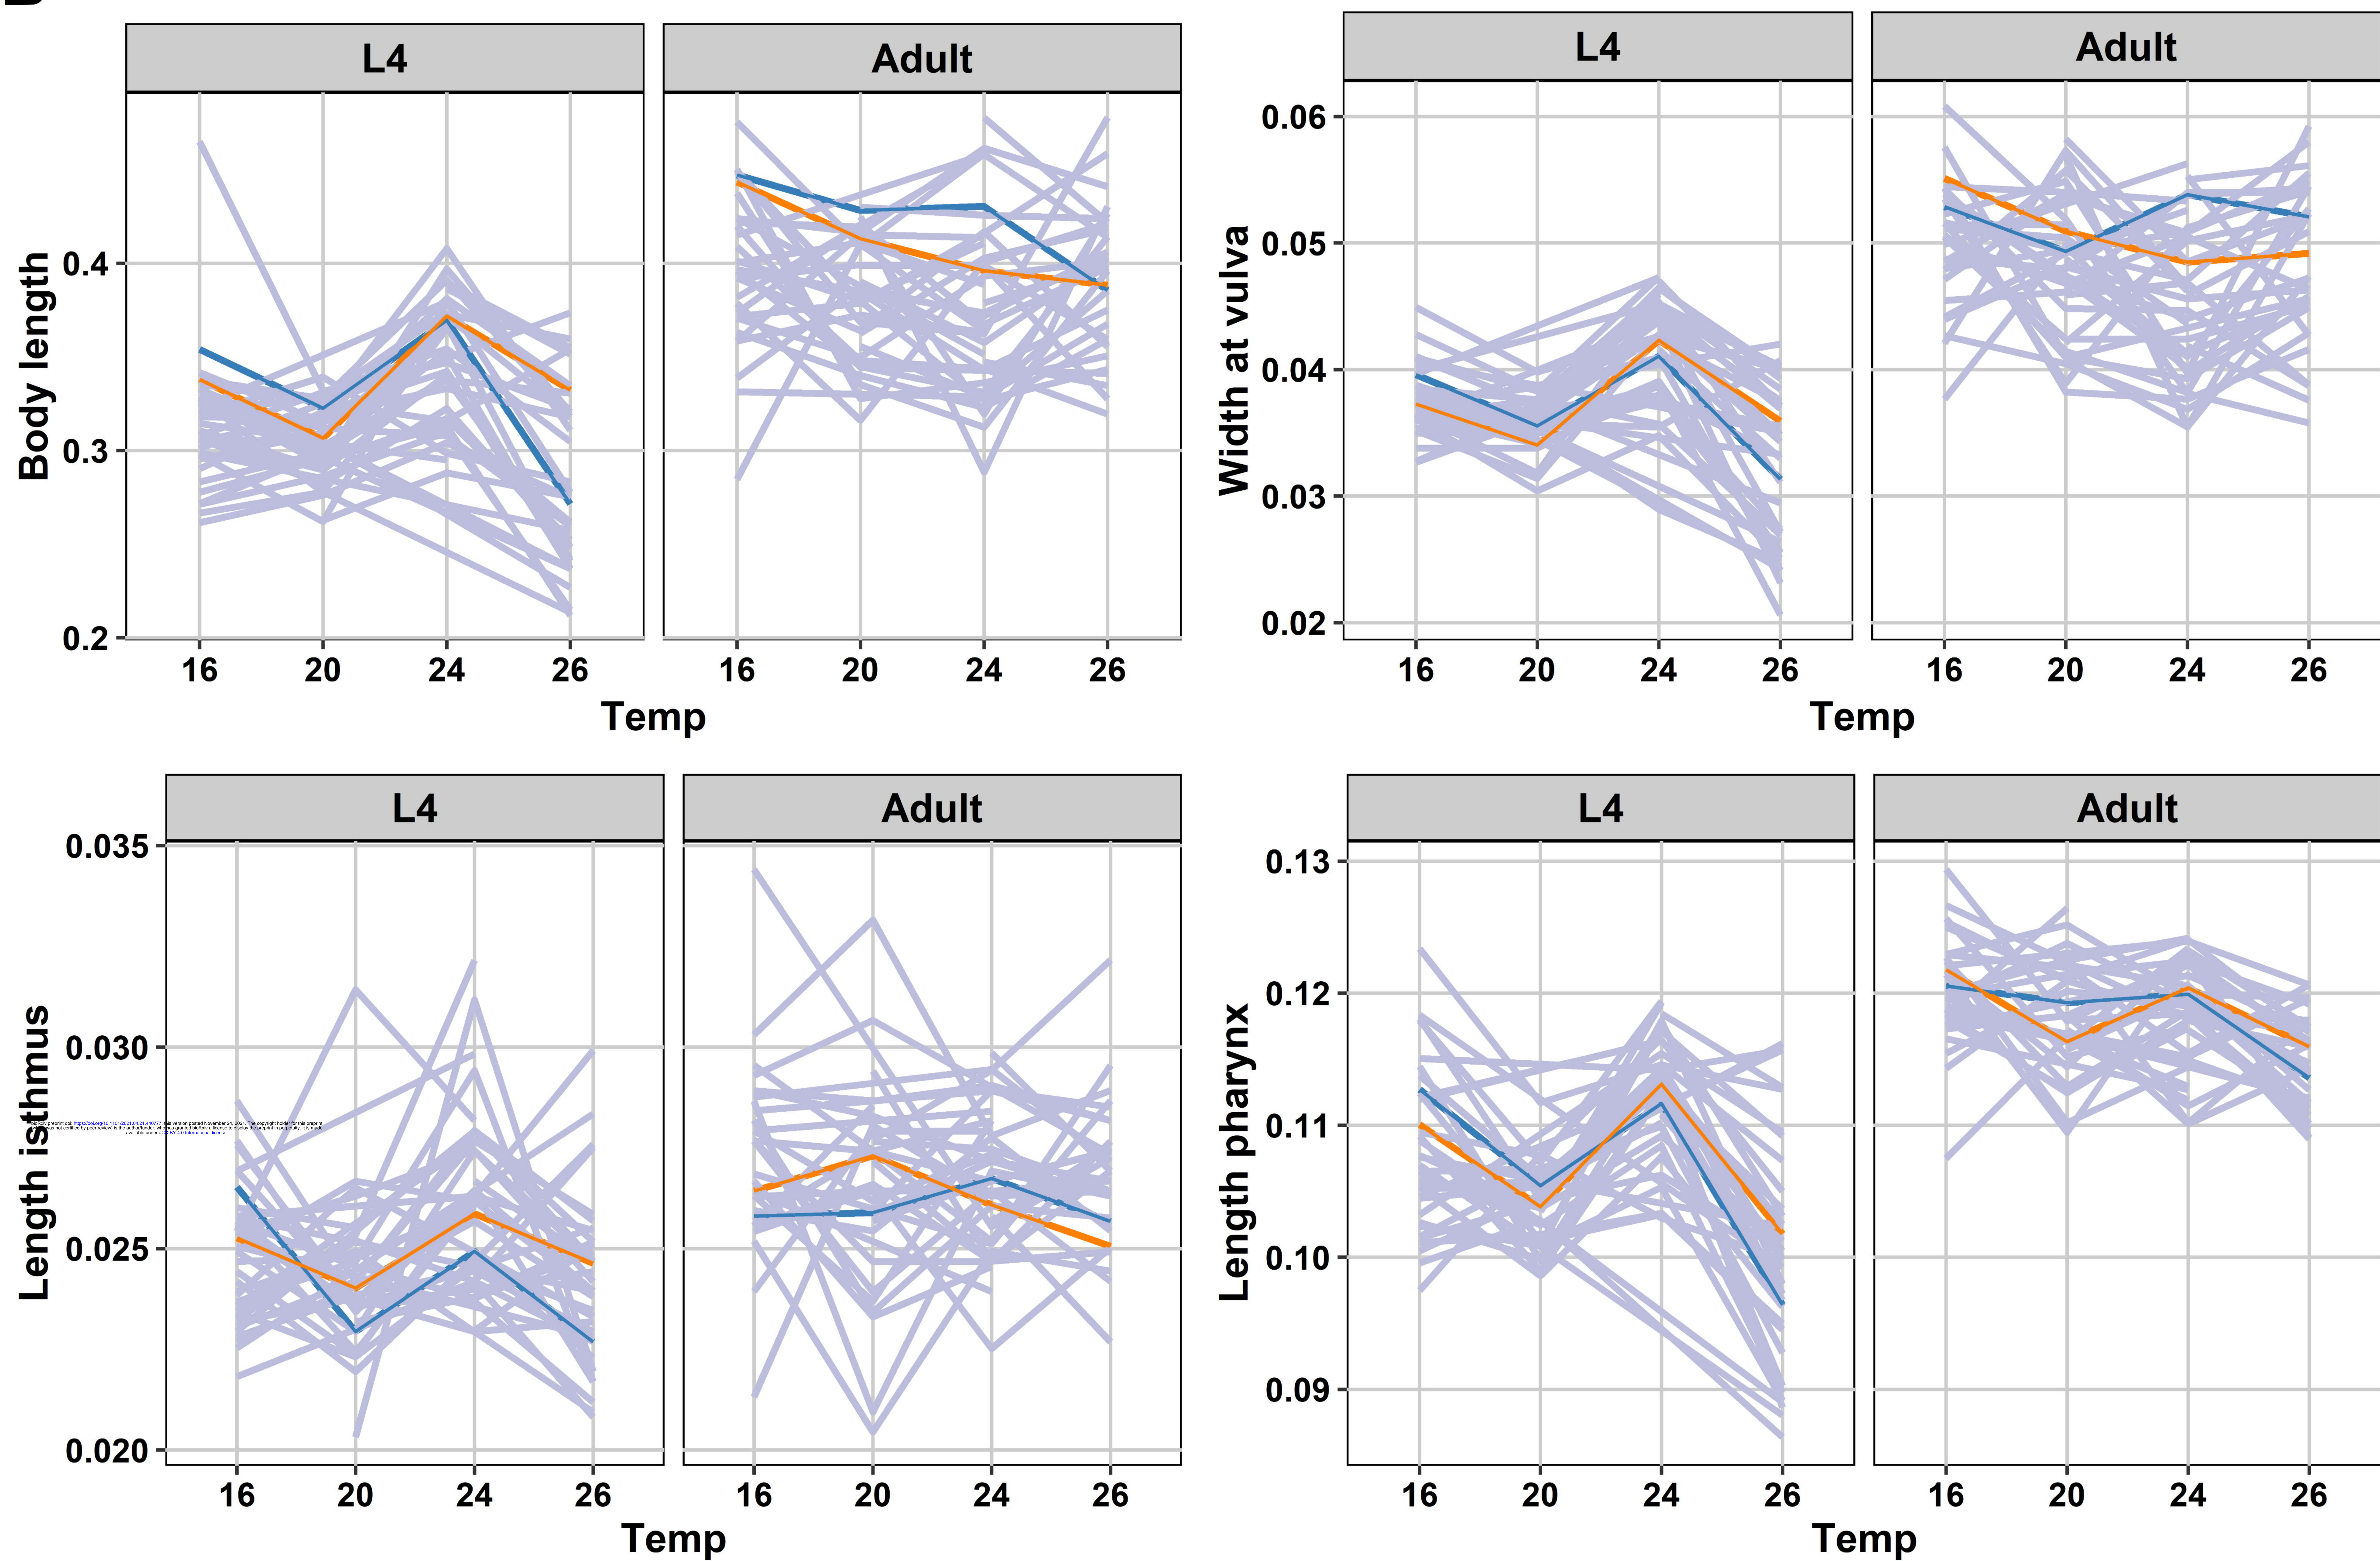

A

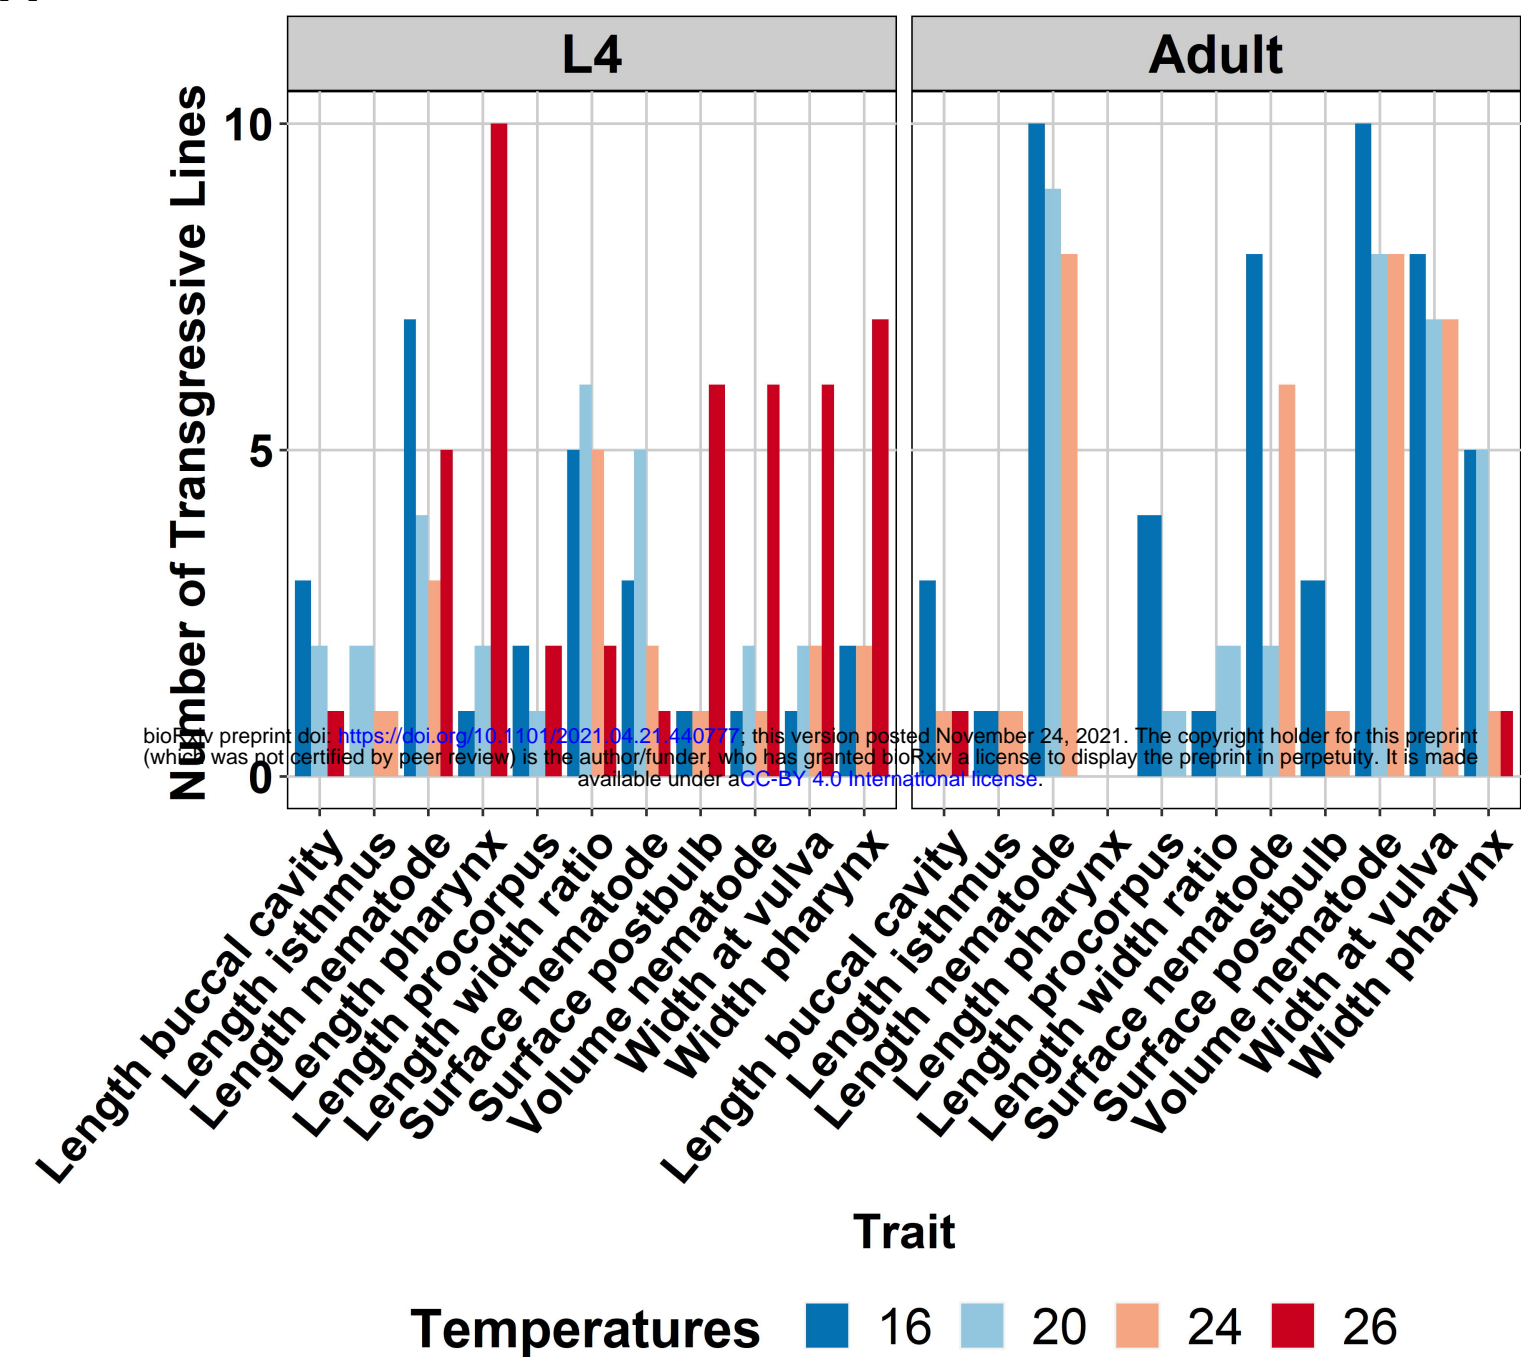

B

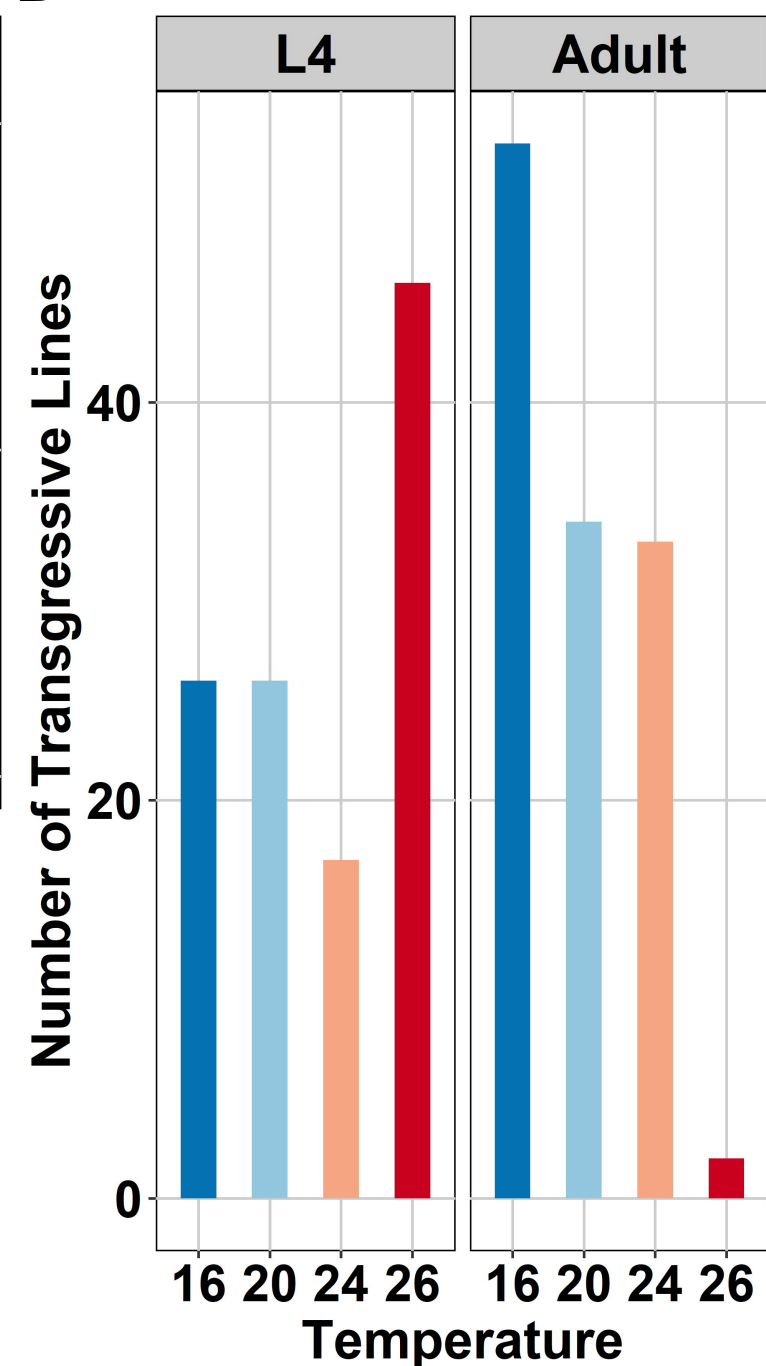

C

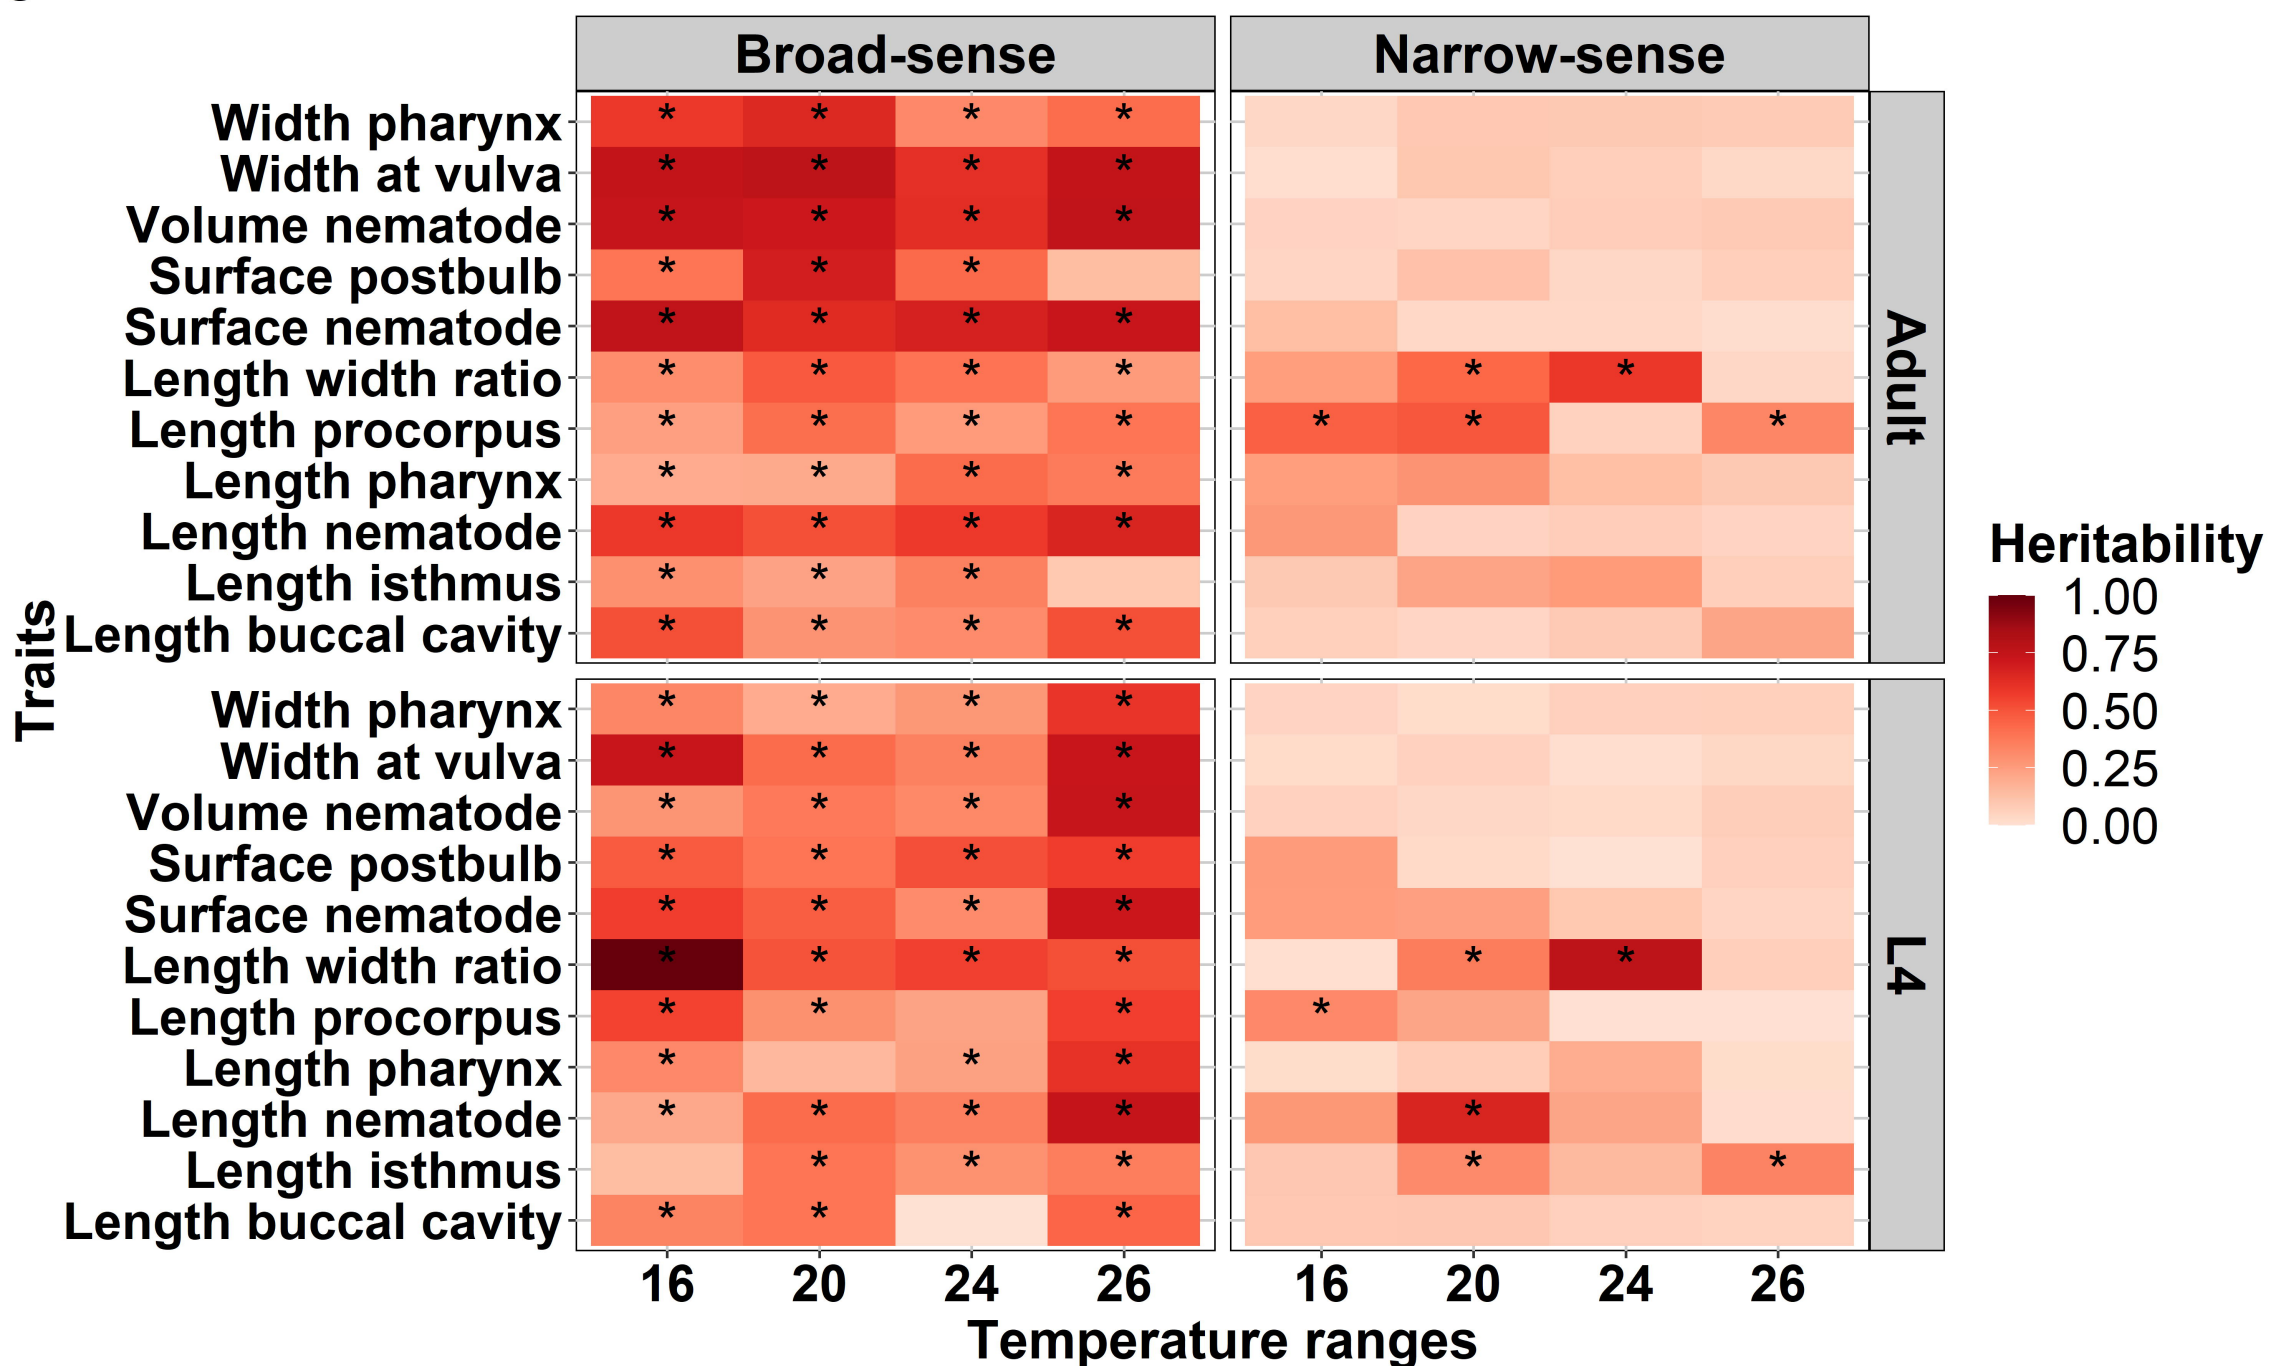

A

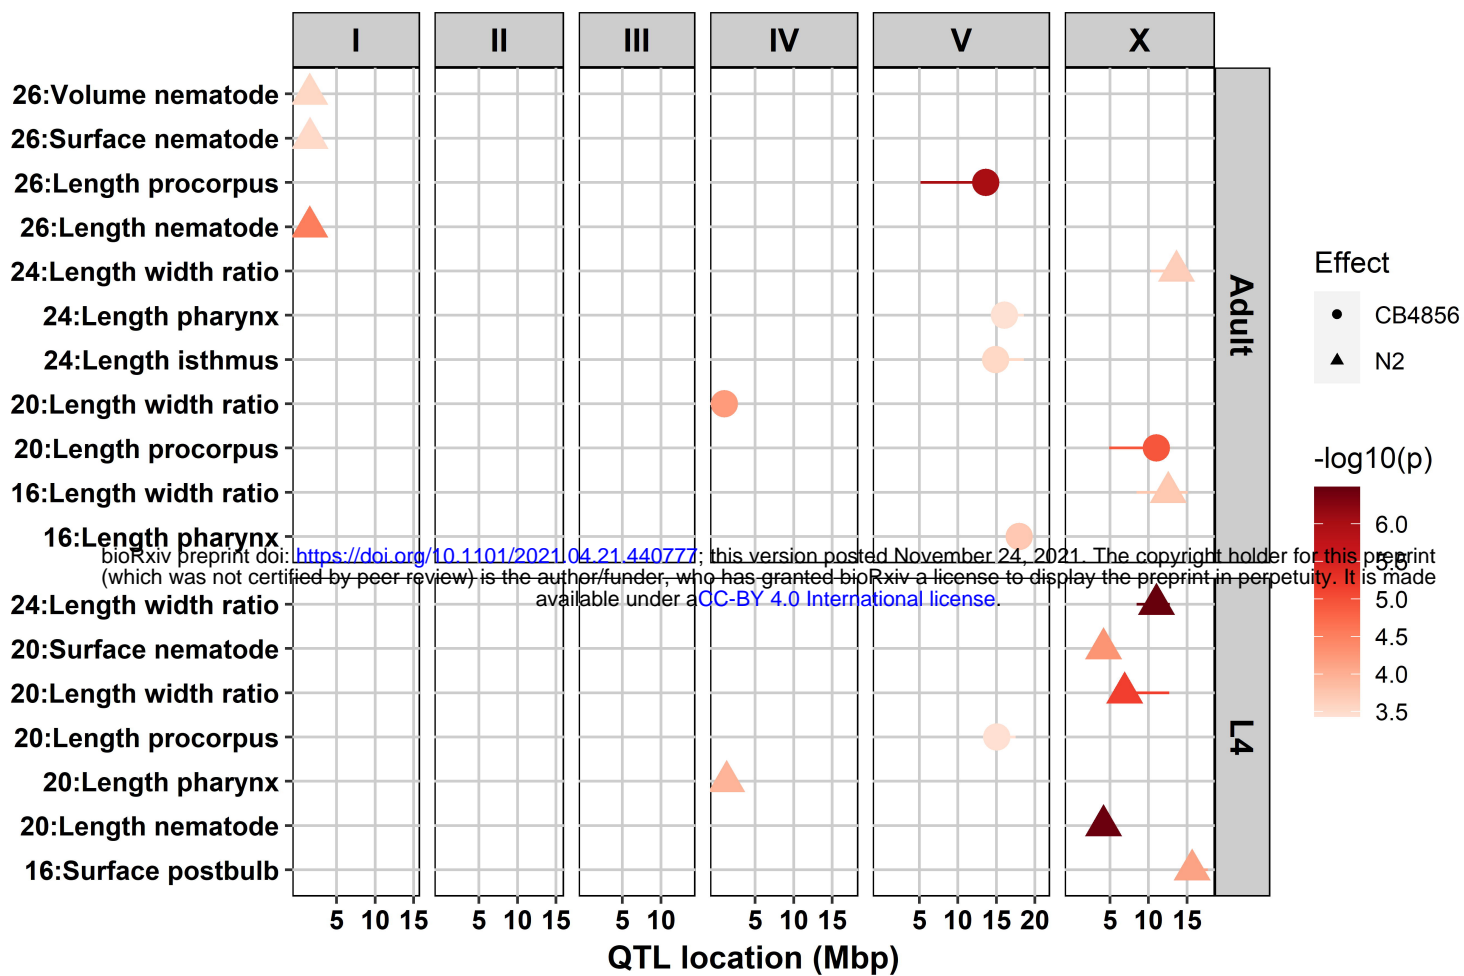

B

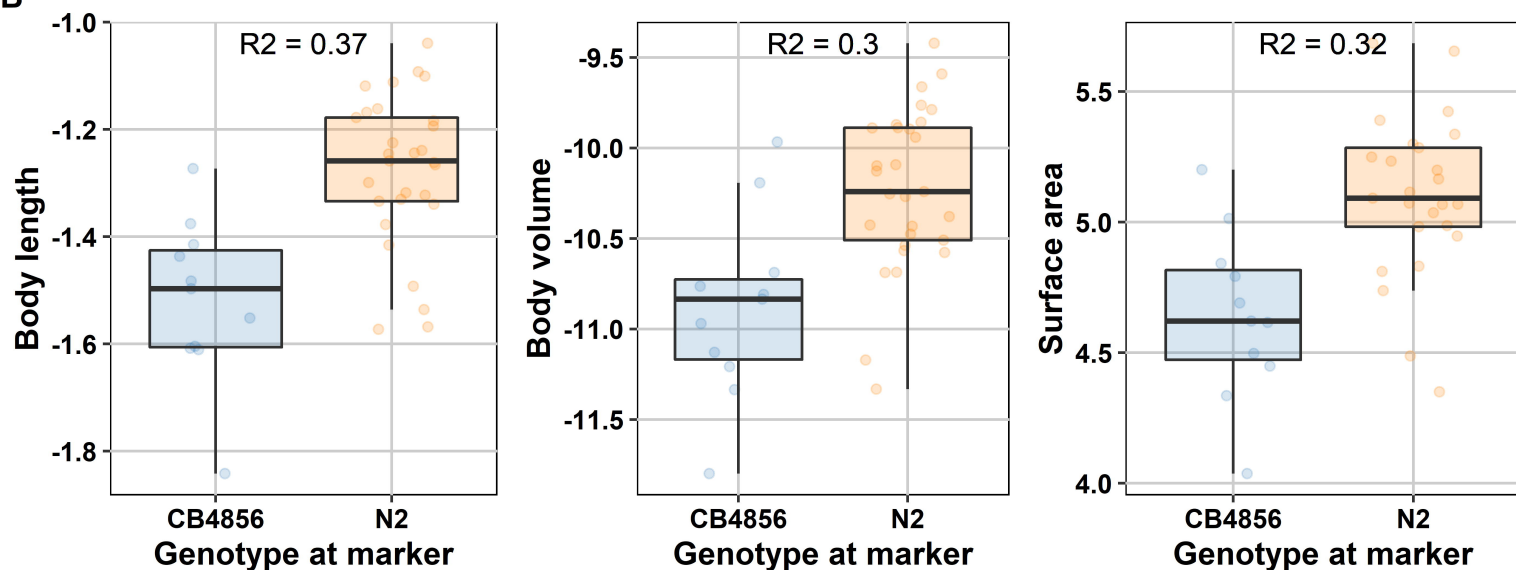

C

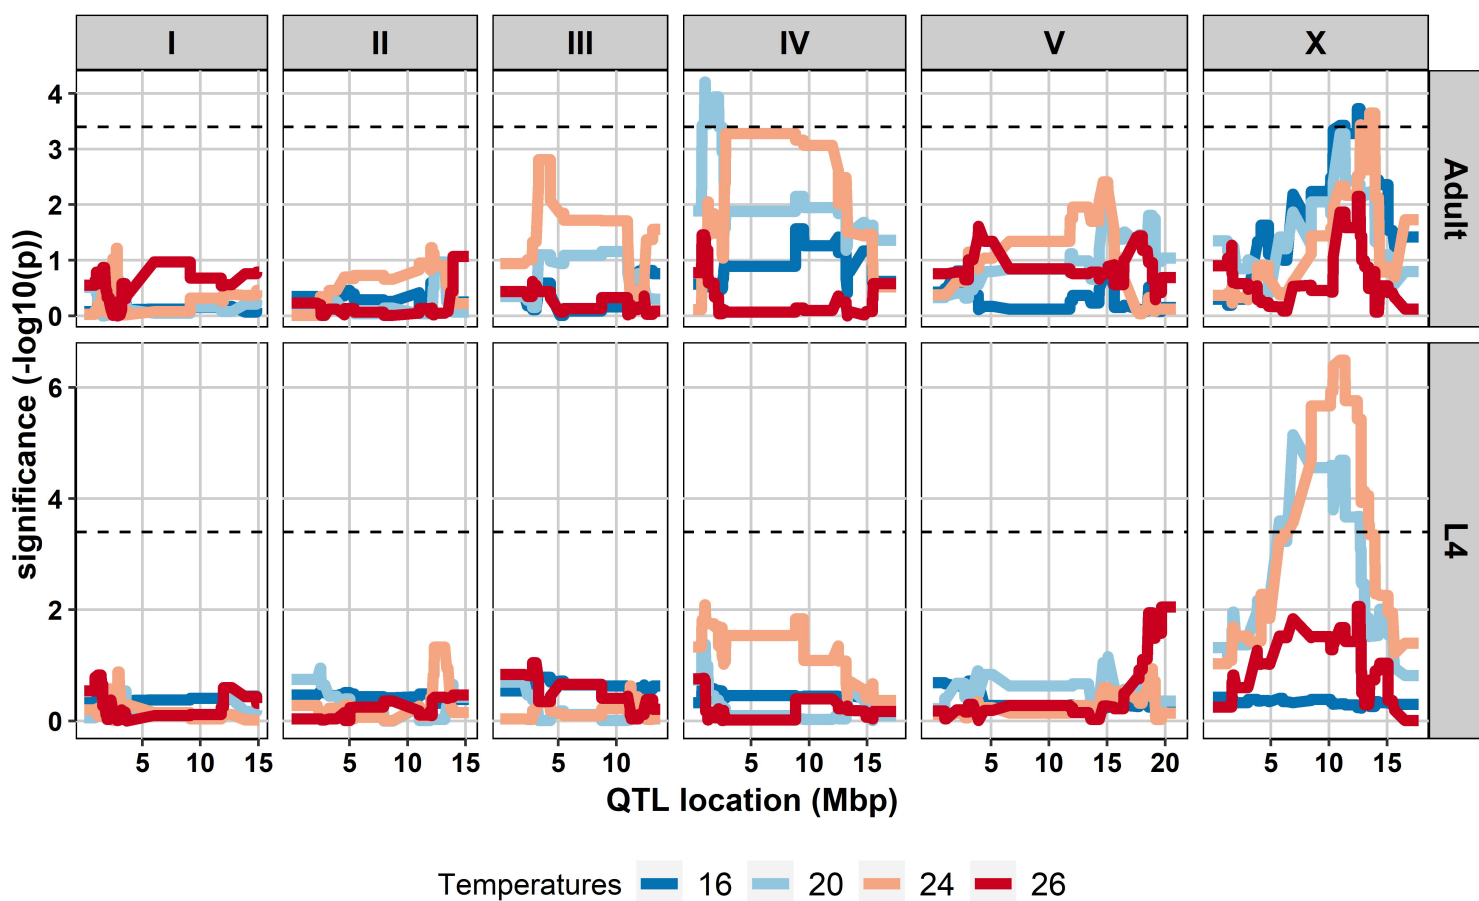

A

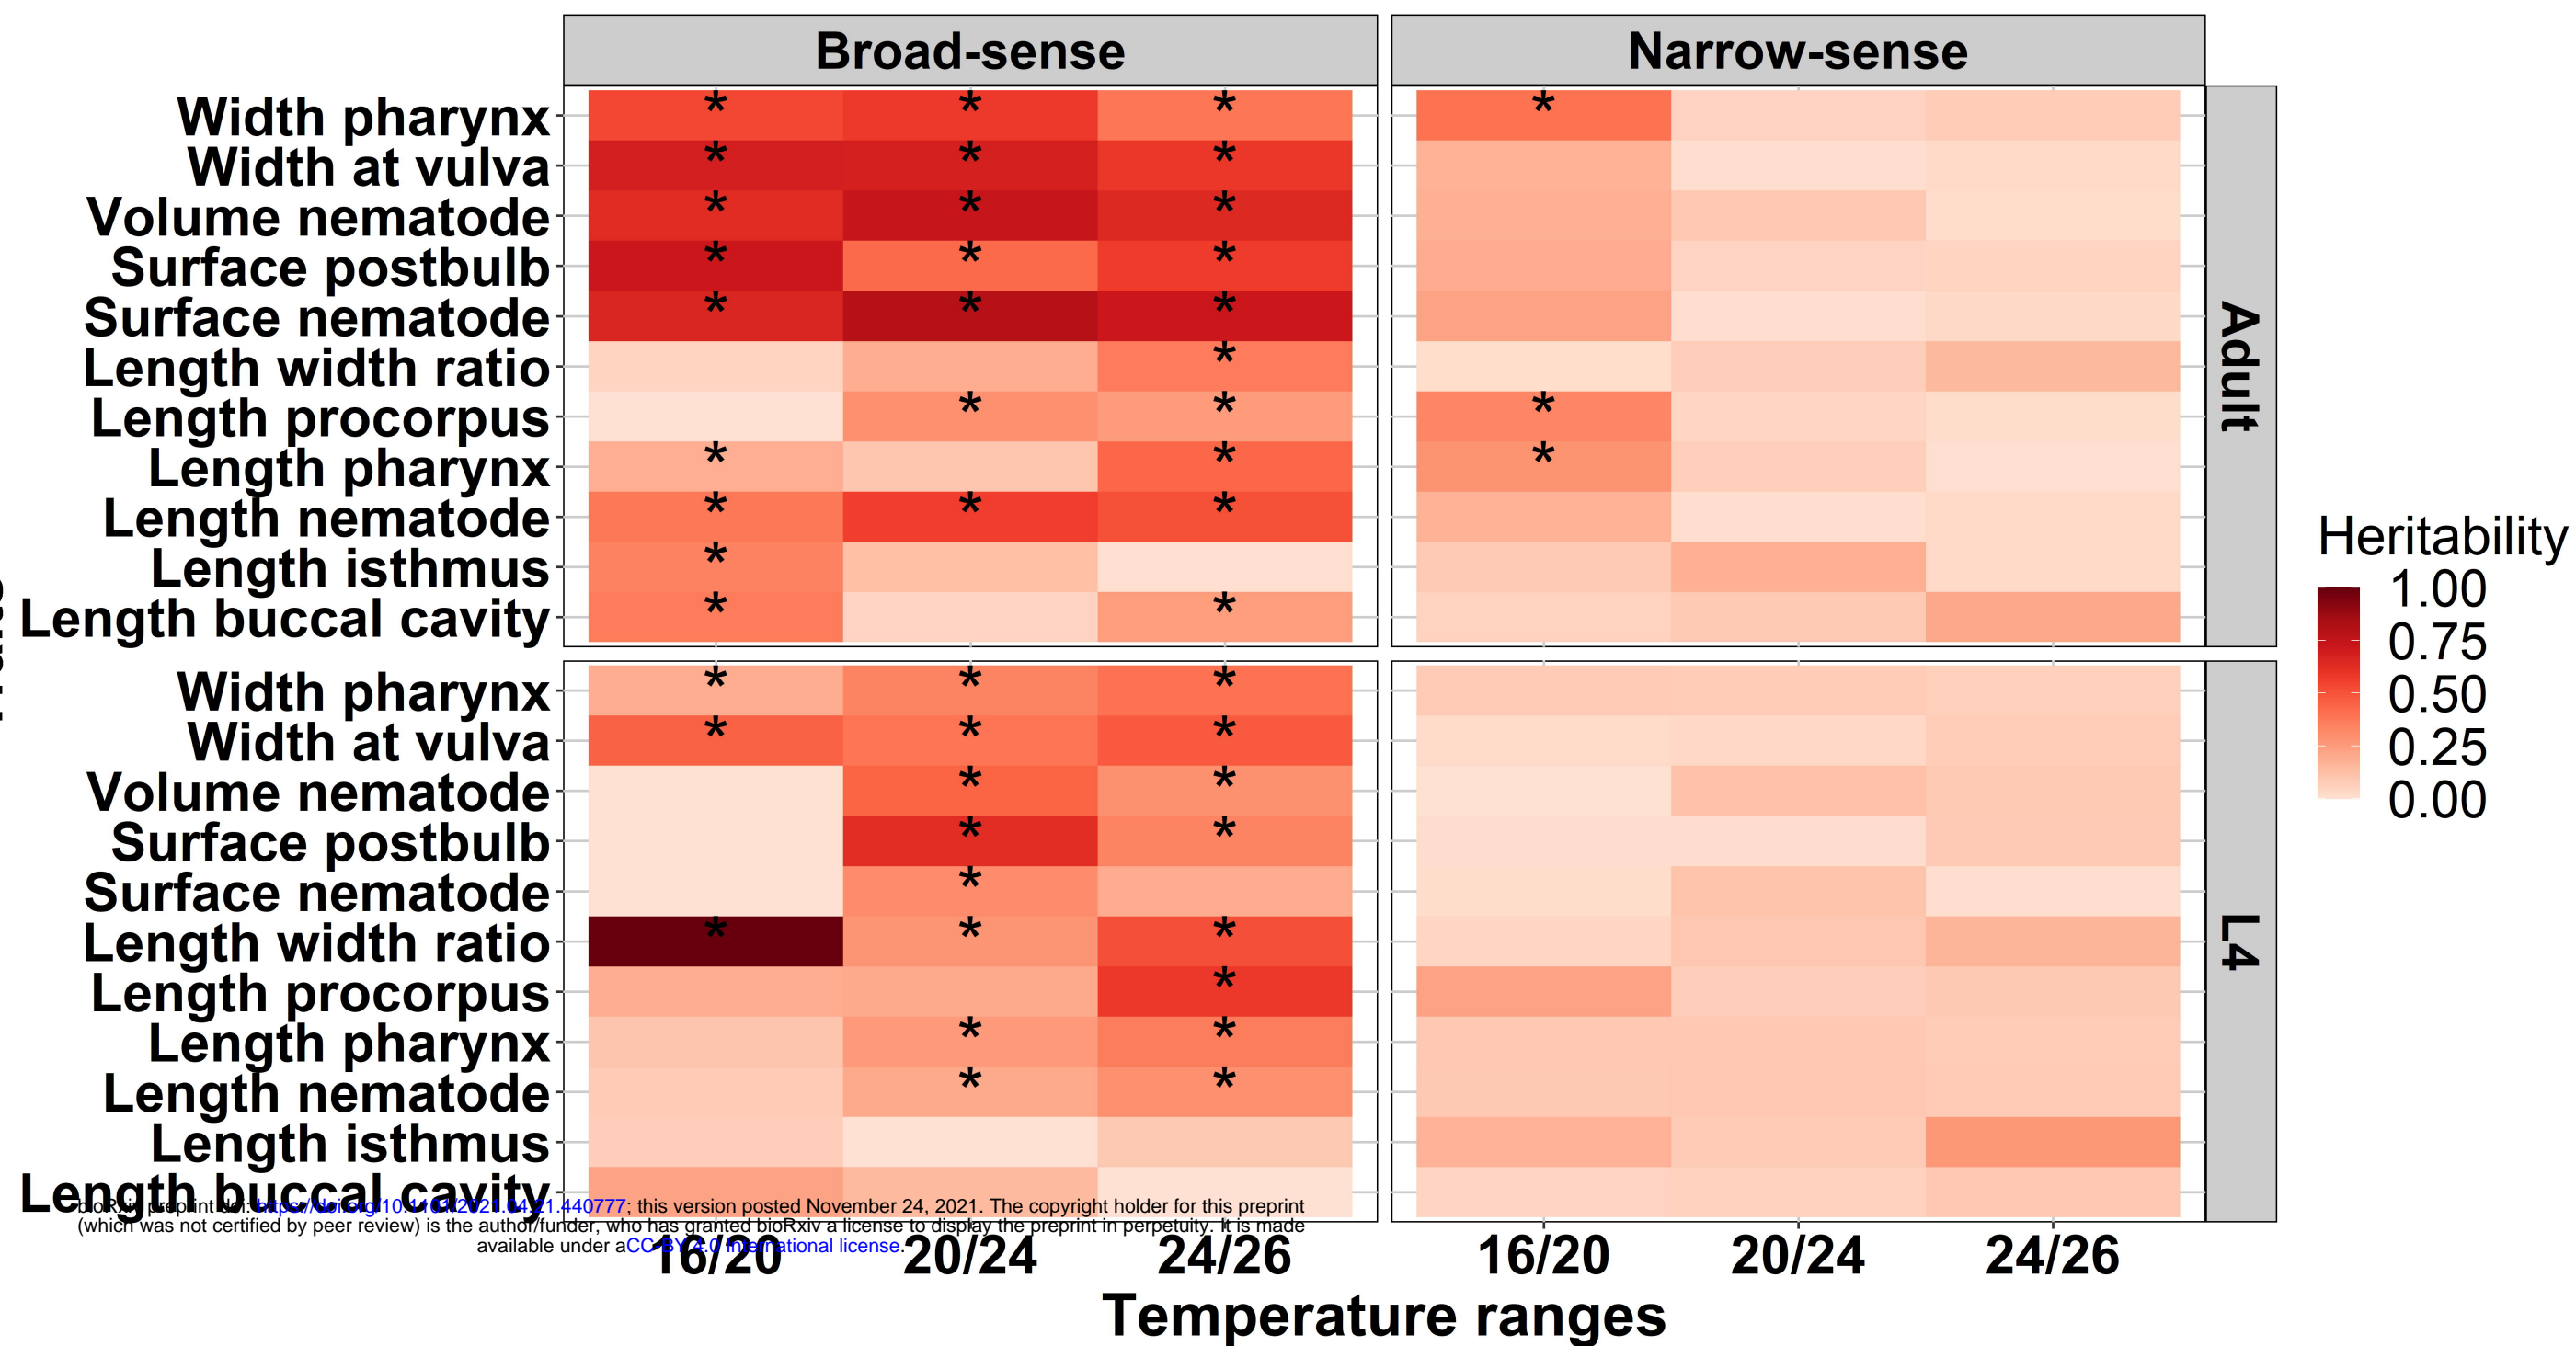

B

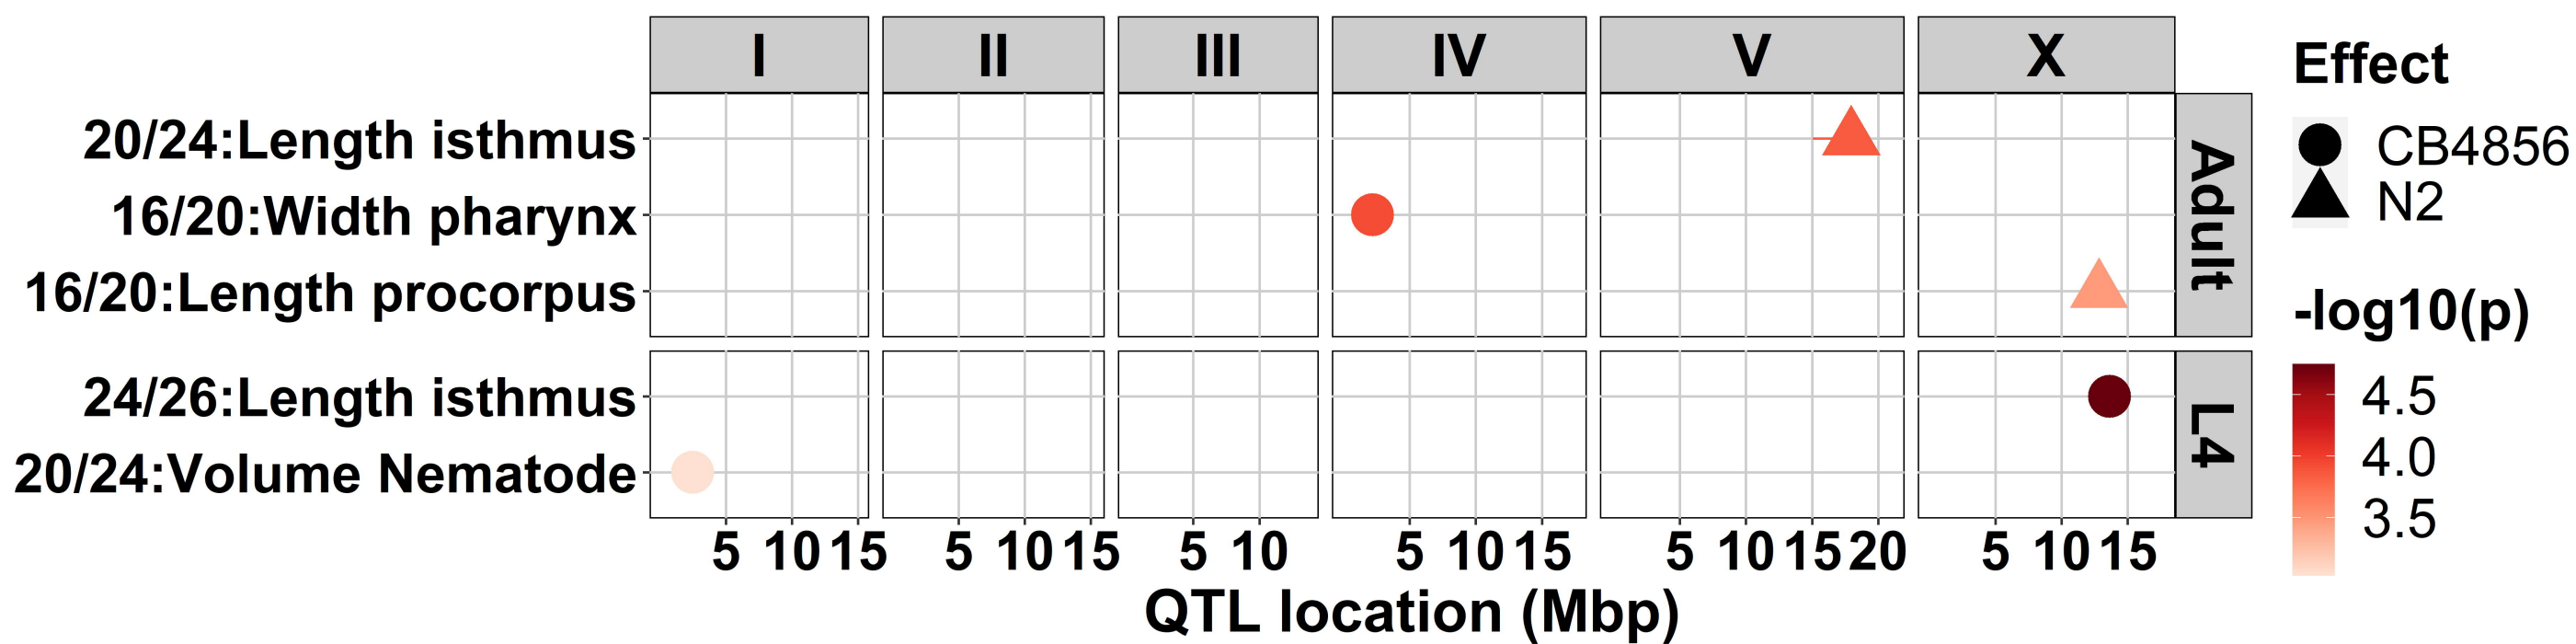

C

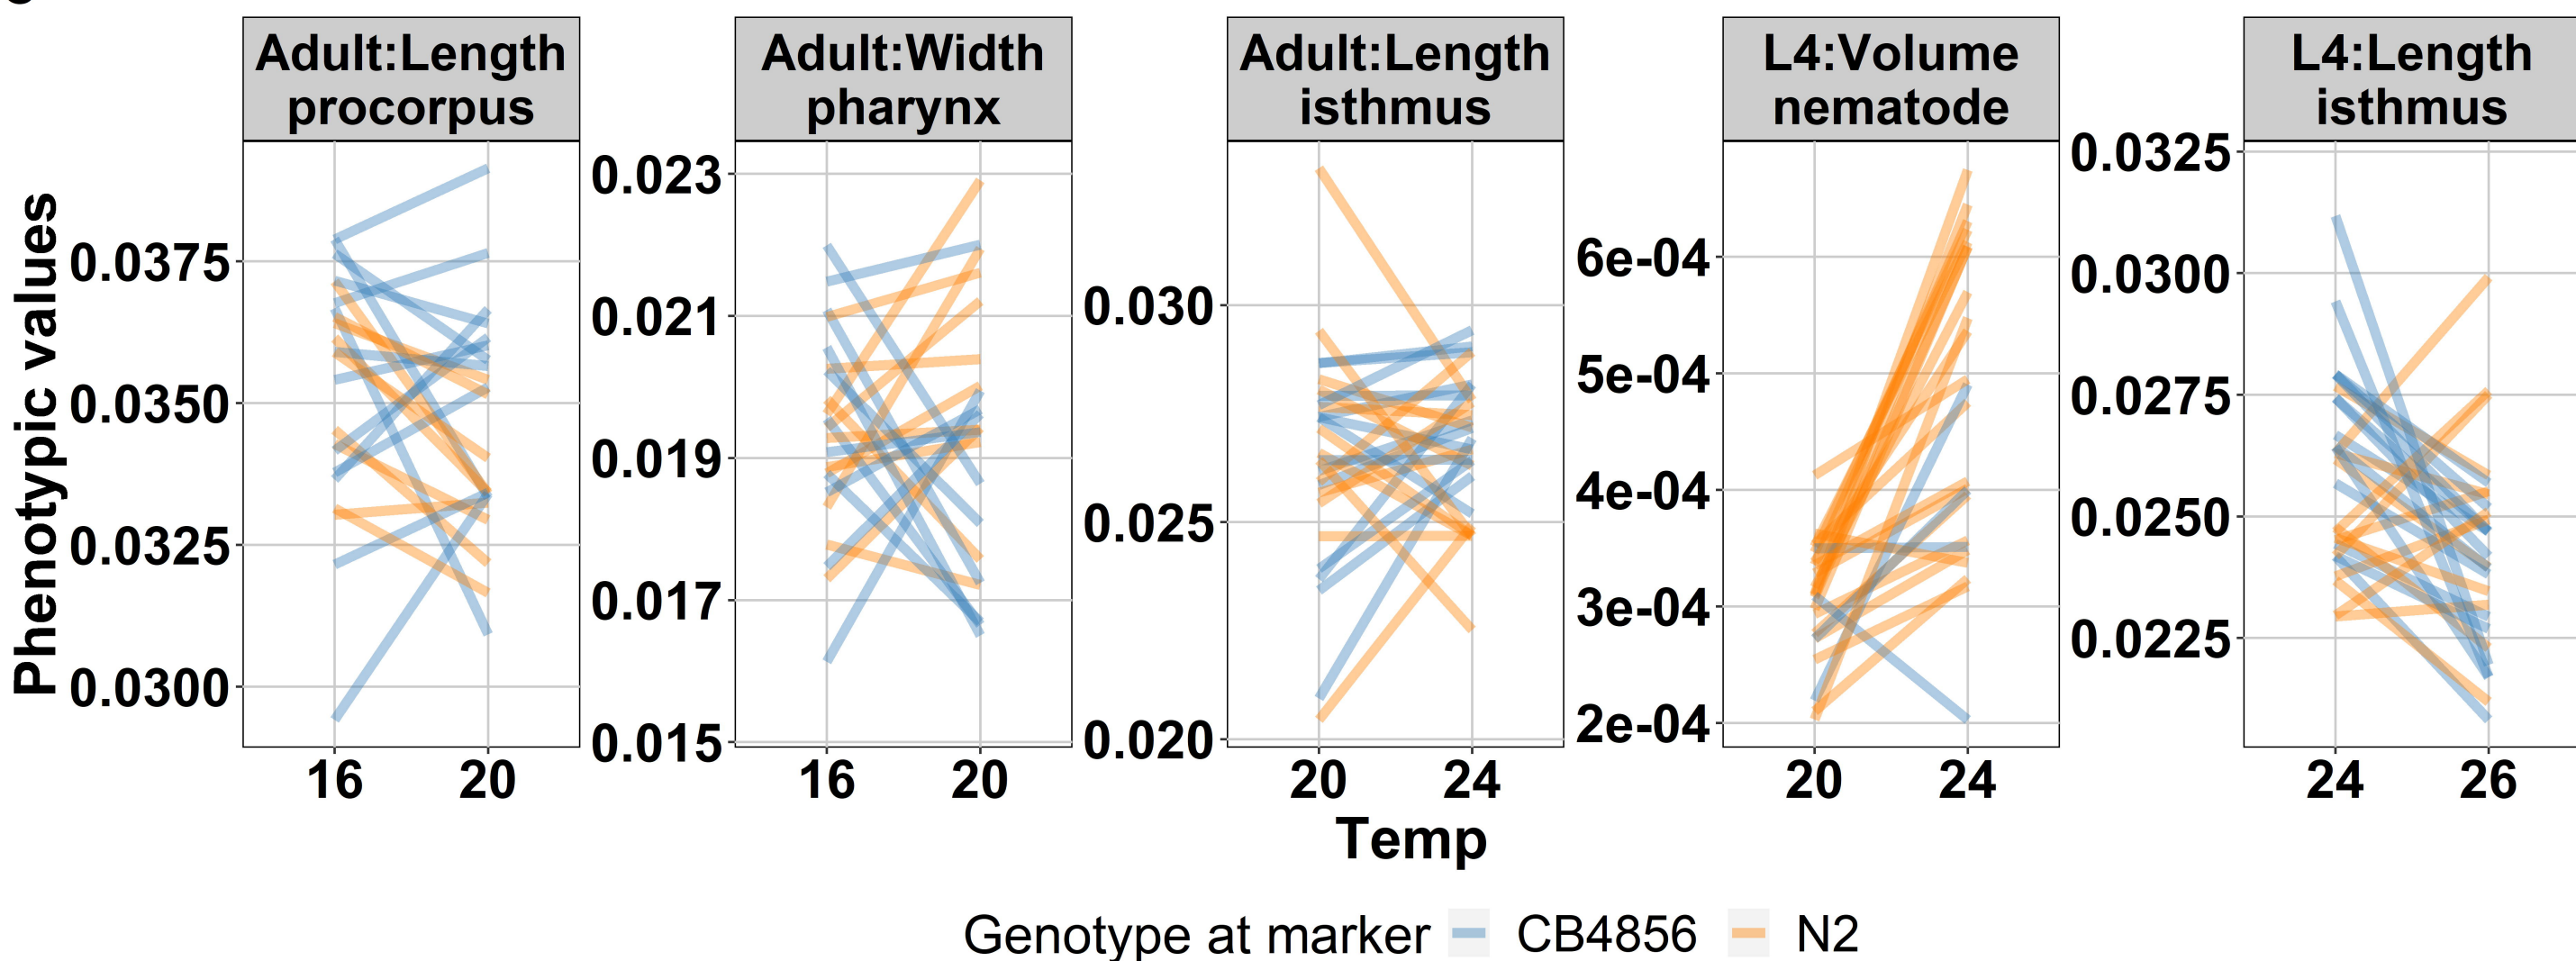

Source: https://www.biorxiv.org/content/10.1101/2021.04.21.440777v3.full.pdf
